# Supplementary material for: Genome-wide association study identifies glutamate ionotropic receptor GRIA4 as a risk gene for comorbid nicotine dependence and major depression
Source: PubMed Central journal article supplement (PMC6172277; doi:10.1038/s41398-018-0258-8), 2018-10-04

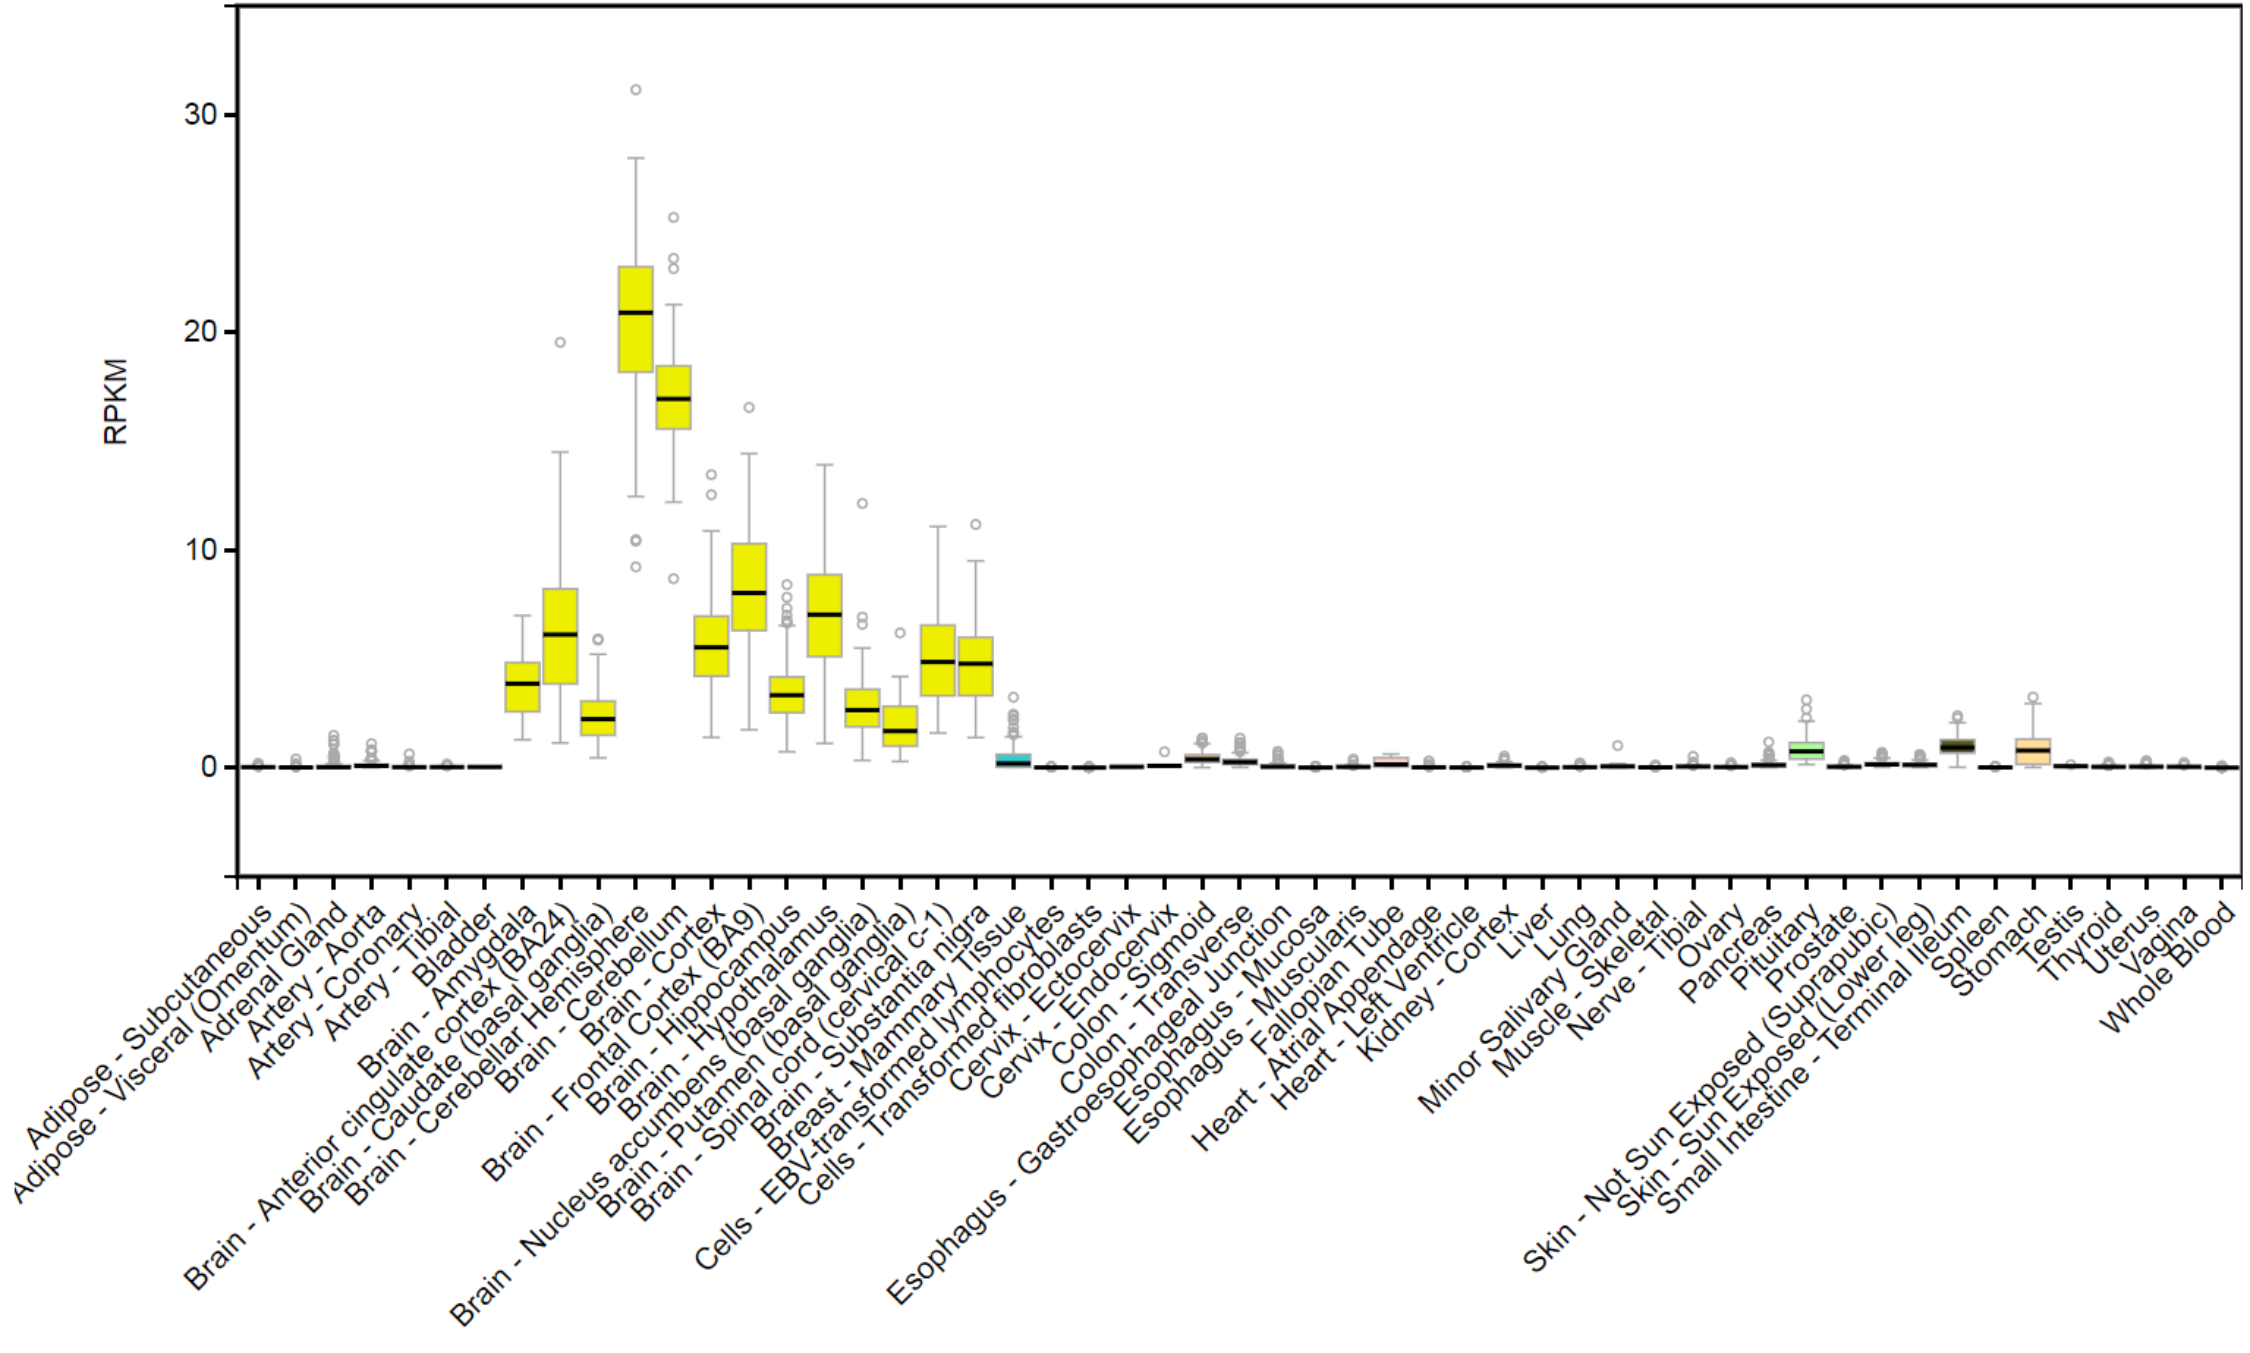

Supplement: 41398_2018_258_MOESM4_ESM.pdf [file 41398_2018_258_MOESM4_ESM.pdf]
