# Supplementary material for: Genome-wide association study identifies glutamate ionotropic receptor GRIA4 as a risk gene for comorbid nicotine dependence and major depression
Source: Transl Psychiatry. 2018 Oct 4;8:208. doi: 10.1038/s41398-018-0258-8 (PMC6172277; doi:10.1038/s41398-018-0258-8)
Supplement: Supplementary file 6 — Supplemental Figure S1 [file 41398_2018_258_MOESM6_ESM.xlsx]

## Sheet: Sheet1
Supplementary Table 1. Top findings (P < 1 x 10-4). A1 is the effect allele, A2 is non-effect allele, EAF is effect allele frequency.
Chr	Position (hg19)	rsID	A1	A2	Genes	Yale-Penn-1				Yale-Penn-2				Meta
						EAF	beta	se	P value	EAF	beta	se	P value	EAF	beta	se	P value
1	6435997	rs112245593	C	CA	ACOT7	0.61	-0.568067	0.136885	3.43305e-05	NA	NA	NA	NA	0.61	-0.5681	0.1369	3.325e-05
1	7012391	rs12141809	C	T	CAMTA1	0.741	0.508398	0.148458	0.000625471	0.758	0.454421	0.237398	0.0558546	0.7458	0.4932	0.1259	8.912e-05
1	8637274	rs200921102	T	TG	RERE	0.026	-1.40772	0.400603	0.000448972	0.024	-1.2411	0.627985	0.0483659	0.0254	-1.3595	0.3377	5.687e-05
1	11019065	rs116795238	A	G	C1orf127	0.019	-0.089952	0.470037	0.848249	0.018	3.01241	0.758587	7.61343e-05	0.0187	0.7707	0.3996	0.05374
1	11020147	rs79139923	A	G	C1orf127	0.981	0.0641517	0.467651	0.8909	0.982	-3.01241	0.758587	7.61343e-05	0.9813	-0.7831	0.3981	0.04917
1	11020334	rs189345666	A	G	C1orf127	0.019	-0.0641517	0.467651	0.8909	0.018	3.01241	0.758587	7.61343e-05	0.0187	0.7831	0.3981	0.04917
1	11385629	rs112736576	A	G		0.071	-1.14003	0.2499	5.30494e-06	NA	NA	NA	NA	0.071	-1.14	0.2499	5.068e-06
1	20399180	rs719542	C	G	PLA2G5	0.171	-0.248687	0.17425	0.153648	0.183	0.998934	0.250976	7.33164e-05	0.1749	0.1571	0.1431	0.2724
1	20399514	rs3767224	C	T	PLA2G5	0.829	0.248687	0.17425	0.153648	0.817	-0.998934	0.250976	7.33164e-05	0.8251	-0.1571	0.1431	0.2724
1	20399643	rs3767225	C	T	PLA2G5	0.171	-0.248687	0.17425	0.153648	0.183	0.988613	0.251007	8.70535e-05	0.1749	0.1537	0.1431	0.283
1	20401355		C	T	PLA2G5	0.151	-0.181789	0.184828	0.325425	0.171	1.02533	0.256981	7.04233e-05	0.1578	0.2298	0.15	0.1257
1	20402504	rs4655147	A	C	PLA2G5	0.861	0.158315	0.194732	0.416298	0.838	-1.05313	0.265795	7.89906e-05	0.853	-0.2648	0.1571	0.09183
1	20402605	rs11573216	A	G	PLA2G5	0.173	-0.265996	0.173779	0.125976	0.184	1.0139	0.250505	5.53626e-05	0.1766	0.1498	0.1428	0.294
1	20402686	rs11573218	A	G	PLA2G5	0.173	-0.263095	0.173811	0.130228	0.184	1.0139	0.250505	5.53626e-05	0.1766	0.1519	0.1428	0.2875
1	20402767	rs11573219	C	T	PLA2G5	0.173	-0.263095	0.173811	0.130228	0.184	1.0139	0.250505	5.53626e-05	0.1766	0.1519	0.1428	0.2875
1	20402793	rs4655148	A	C	PLA2G5	0.827	0.263095	0.173811	0.130228	0.816	-1.0139	0.250505	5.53626e-05	0.8234	-0.1519	0.1428	0.2875
1	22229090	rs6680566	C	T	HSPG2	0.22	0.651185	0.155642	2.96179e-05	0.25	-0.205803	0.227252	0.365337	0.2296	0.3776	0.1284	0.003281
1	22232376	rs10917062	C	T	HSPG2	0.79	-0.65625	0.15824	3.47467e-05	0.773	0.191625	0.237065	0.419079	0.7848	-0.3949	0.1316	0.002695
1	25430696	rs12028403	C	T		0.558	-0.521577	0.128675	5.19638e-05	NA	NA	NA	NA	0.558	-0.5216	0.1287	5.047e-05
1	25450928	rs11248984	C	T		0.549	-0.50335	0.128789	9.5321e-05	NA	NA	NA	NA	0.549	-0.5033	0.1288	9.293e-05
1	25452437	rs11248985	C	T		0.549	-0.507473	0.128593	8.14698e-05	0.543	0.0663621	0.196694	0.735889	0.5472	-0.3356	0.1076	0.001818
1	25458415	rs3855960	A	G		0.456	0.502079	0.128625	9.72701e-05	0.464	-0.0695499	0.196689	0.723704	0.4584	0.3308	0.1077	0.002117
1	25461985	rs1474995	C	G		0.453	0.520187	0.128921	5.62029e-05	0.462	-0.0347462	0.195964	0.859298	0.4557	0.3526	0.1077	0.001063
1	25464820	rs12122408	C	T		0.455	0.50528	0.129036	9.24356e-05	0.468	-0.0782637	0.195959	0.689683	0.4589	0.3288	0.1078	0.002282
1	38067652	rs141762164	A	G		0.024	2.12606	0.416771	3.61887e-07	NA	NA	NA	NA	0.024	2.1261	0.4168	3.374e-07
1	38085739	rs113912835	A	T	RSPO1	0.977	-2.09175	0.421737	7.51271e-07	NA	NA	NA	NA	0.977	-2.0918	0.4217	7.055e-07
1	38606945	rs138410875	C	CGTGCCTTAGA		0.893	-0.838051	0.206854	5.24101e-05	0.878	-0.167845	0.300138	0.576121	0.8882	-0.6222	0.1703	0.0002589
1	38609183	rs78500468	A	G		0.892	-0.88175	0.206382	2.00363e-05	0.878	-0.167845	0.300138	0.576121	0.8875	-0.6526	0.1701	0.0001244
1	38619543	rs748955	A	G		0.892	-0.889073	0.206492	1.72745e-05	0.878	-0.167845	0.300138	0.576121	0.8875	-0.6574	0.1701	0.0001115
1	38619658	rs75748001	C	T		0.893	-0.870418	0.2068	2.65294e-05	0.879	-0.18176	0.301036	0.546111	0.8885	-0.6496	0.1705	0.0001383
1	38623428		C	G		0.107	0.87208	0.20769	2.77232e-05	0.12	0.160427	0.301368	0.594604	0.1112	0.6429	0.171	0.0001702
1	38629110	rs79991709	G	T		0.89	-0.825857	0.203817	5.2289e-05	0.879	-0.166257	0.301024	0.58085	0.8865	-0.6185	0.1688	0.0002475
1	40493965	rs7549080	A	G		0.501	0.282623	0.132192	0.0326123	0.527	0.824411	0.20163	4.64895e-05	0.5088	0.4455	0.1106	5.583e-05
1	49190234	rs1484406	A	G	AGBL4	0.766	-0.616169	0.150274	4.25339e-05	0.784	0.112417	0.243269	0.644093	0.771	-0.4149	0.1278	0.001172
1	49415409	rs7522725	C	T	AGBL4	0.744	0.605952	0.151407	6.45368e-05	0.738	0.175164	0.227235	0.44096	0.7422	0.4735	0.126	0.0001713
1	61929717	rs2474363	A	C		0.585	-0.526725	0.131724	6.54812e-05	NA	NA	NA	NA	0.585	-0.5267	0.1317	6.369e-05
1	62630730	rs149711071	G	T		0.025	-1.57976	0.402435	8.8814e-05	NA	NA	NA	NA	0.025	-1.5798	0.4024	8.655e-05
1	62631592	rs17123167	C	T		0.025	-1.57976	0.402435	8.8814e-05	NA	NA	NA	NA	0.025	-1.5798	0.4024	8.655e-05
1	64842164	rs151016833	A	G		0.036	1.48957	0.346057	1.73671e-05	0.047	0.0459351	0.467616	0.921765	0.0399	0.9787	0.2782	0.0004341
1	64845120	rs77770451	C	T		0.056	1.19315	0.27914	1.98608e-05	0.073	-0.183833	0.38132	0.629831	0.0619	0.7127	0.2252	0.001555
1	64848661	rs79818085	C	T		0.965	-1.49169	0.348484	1.93266e-05	0.953	-0.0459351	0.467616	0.921765	0.9607	-0.9755	0.2794	0.0004813
1	64850990	rs75429702	A	G		0.946	-1.21774	0.283101	1.76011e-05	0.927	0.239892	0.381306	0.529392	0.9392	-0.6998	0.2273	0.00208
1	66989333	rs79472563	A	G		0.978	-0.555256	0.437977	0.204992	0.979	2.72503	0.678905	6.37272e-05	0.9783	0.4087	0.368	0.2667
1	66990359	rs114956309	C	T		0.954	-0.195709	0.306538	0.523238	0.961	2.53649	0.486148	2.16135e-07	0.956	0.5815	0.2593	0.02491
1	66991331		A	G		0.036	0.467827	0.345942	0.176389	0.031	-2.50819	0.540151	3.83335e-06	0.0345	-0.3978	0.2913	0.1721
1	66992716	rs76002143	A	C		0.964	-0.467827	0.345942	0.176389	0.968	2.55819	0.5367	2.12222e-06	0.9652	0.4204	0.2908	0.1483
1	66993955	rs141865560	C	T		0.045	0.215037	0.307995	0.485125	0.039	-2.58048	0.488014	1.48984e-07	0.0433	-0.5813	0.2605	0.02563
1	66996115	rs114565107	G	T		0.044	0.188152	0.310544	0.54465	0.038	-2.64071	0.49241	9.9575e-08	0.0423	-0.6168	0.2627	0.01886
1	66996308	rs199847771	A	AT		0.955	-0.161917	0.309988	0.601483	0.962	2.64071	0.49241	9.9575e-08	0.957	0.6335	0.2623	0.01573
1	66998099	rs78473006	C	T		0.979	-0.457708	0.450915	0.31017	0.979	2.72503	0.678905	6.37272e-05	0.979	0.5165	0.3756	0.1691
1	67003529	rs114657047	A	G	SGIP1	0.032	-0.0315422	0.363997	0.930952	0.029	-2.60214	0.576864	7.14119e-06	0.0311	-0.7636	0.3078	0.01312
1	67007736	rs145060139	C	T	SGIP1	0.968	0.0315422	0.363997	0.930952	0.971	2.60214	0.576864	7.14119e-06	0.9689	0.7636	0.3078	0.01312
1	67009715	rs112048669	A	G	SGIP1	0.97	-0.161579	0.375008	0.666599	0.972	2.63231	0.581352	6.59774e-06	0.9706	0.6594	0.3151	0.03641
1	67009833	rs76450637	A	G	SGIP1	0.97	-0.173547	0.373916	0.64259	0.972	2.63231	0.581352	6.59774e-06	0.9706	0.6475	0.3145	0.03949
1	67016789	rs111992850	A	G	SGIP1	0.97	-0.256134	0.380326	0.500714	0.973	2.77635	0.599041	3.99742e-06	0.9709	0.6151	0.3211	0.05542
1	67019646		A	G	SGIP1	0.022	0.549228	0.441171	0.21327	0.02	-2.74748	0.69952	9.10475e-05	0.0214	-0.3889	0.3732	0.2973
1	67020435	rs143031909	C	T	SGIP1	0.022	0.51231	0.438394	0.24267	0.02	-2.74748	0.69952	9.10475e-05	0.0214	-0.407	0.3715	0.2733
1	68101996	rs17130168	G	T		0.022	-1.813	0.430276	2.5999e-05	NA	NA	NA	NA	0.022	-1.813	0.4303	2.514e-05
1	68106952	rs148334828	G	T		0.976	1.72698	0.414602	3.21028e-05	NA	NA	NA	NA	0.976	1.727	0.4146	3.108e-05
1	68764788	rs7541579	A	G		0.334	-0.020437	0.138497	0.882699	0.322	-0.838042	0.214125	9.63628e-05	0.3305	-0.2616	0.1163	0.02448
1	69943001	rs1120087	C	T		0.63	0.456939	0.133162	0.000609788	0.63	0.385868	0.206594	0.0620586	0.63	0.4361	0.1119	9.774e-05
1	69945031	rs1340749	C	G		0.63	0.463676	0.133179	0.000506711	0.63	0.385868	0.206594	0.0620586	0.63	0.4408	0.1119	8.208e-05
1	69951788		G	T		0.632	0.478268	0.133137	0.000333902	0.631	0.382069	0.20639	0.0644059	0.6317	0.45	0.1119	5.766e-05
1	69953003	rs77222135	G	T		0.367	-0.485266	0.132946	0.000267349	0.368	-0.353671	0.20616	0.086529	0.3673	-0.4466	0.1117	6.407e-05
1	69953561	rs3980971	A	C		0.574	0.518495	0.13101	7.77228e-05	0.565	0.348514	0.201241	0.0835824	0.5713	0.4679	0.1098	2.03e-05
1	69953608	rs1952143	A	T		0.369	-0.472332	0.133232	0.000399328	0.369	-0.382069	0.20639	0.0644059	0.369	-0.4458	0.1119	6.82e-05
1	69954514	rs1578566	C	T		0.631	0.468149	0.133213	0.000448532	0.631	0.378741	0.206449	0.0668382	0.631	0.4419	0.1119	7.895e-05
1	69960199	rs1341794	A	G		0.632	0.474973	0.13314	0.000367008	0.632	0.36633	0.20559	0.0750469	0.632	0.4429	0.1118	7.403e-05
1	79059862	rs145869895	C	T		0.016	-2.10388	0.517015	4.8573e-05	NA	NA	NA	NA	0.016	-2.1039	0.517	4.716e-05
1	81659678	rs4259706	C	T		0.082	0.741179	0.237001	0.00178372	0.089	0.855306	0.350254	0.0147625	0.0842	0.777	0.1963	7.539e-05
1	83428155	rs78239090	A	G		0.989	-2.42017	0.621393	0.000100792	NA	NA	NA	NA	0.989	-2.4202	0.6214	9.83e-05
1	88729683	rs74823926	C	T		0.971	1.5512	0.379428	4.47906e-05	0.969	-0.676301	0.555974	0.22408	0.9704	0.8434	0.3134	0.007121
1	88733665	rs200191134	G	GA		0.029	-1.5512	0.379428	4.47906e-05	0.031	0.725689	0.552429	0.18924	0.0296	-0.8214	0.3128	0.008634
1	88735401	rs534160088	T	TC		0.029	-1.51581	0.378011	6.24511e-05	0.032	0.705468	0.544824	0.195639	0.03	-0.794	0.3106	0.01057
1	88739923	rs17436482	C	T		0.044	-1.20445	0.305696	8.36277e-05	0.045	0.626703	0.459701	0.173068	0.0443	-0.643	0.2546	0.01154
1	88741980	rs115590681	C	T		0.97	1.46494	0.372957	8.7934e-05	0.967	-0.86025	0.537254	0.109617	0.969	0.7088	0.3064	0.02069
1	88743007	rs116070595	C	T		0.03	-1.46494	0.372957	8.7934e-05	0.033	0.86025	0.537254	0.109617	0.031	-0.7088	0.3064	0.02069
1	88747734	rs115194333	C	T		0.97	1.50234	0.370599	5.18809e-05	0.966	-0.757442	0.531359	0.154298	0.9687	0.7628	0.304	0.01209
1	88756953	rs76120044	C	T		0.97	1.44775	0.370815	9.69396e-05	0.966	-0.757442	0.531359	0.154298	0.9687	0.7255	0.3041	0.01704
1	92025262	rs6687904	A	G		0.319	0.0070411	0.1388	0.959546	0.3	-0.892641	0.219143	4.96296e-05	0.3136	-0.2505	0.1173	0.03262
1	92144119	rs138942481	A	C		0.012	-2.36613	0.573005	3.75369e-05	NA	NA	NA	NA	0.012	-2.3661	0.573	3.638e-05
1	92365816	rs11585105	A	G	TGFBR3	0.157	0.47671	0.184587	0.00986106	0.174	0.83688	0.268136	0.00184815	0.1625	0.5925	0.152	9.738e-05
1	92366174	rs17576372	C	T	TGFBR3	0.157	0.47671	0.184587	0.00986106	0.174	0.83688	0.268136	0.00184815	0.1625	0.5925	0.152	9.738e-05
1	92370101	rs66786059	A	G	TGFBR3	0.157	0.496004	0.184146	0.00711564	0.174	0.806426	0.268999	0.00277891	0.1624	0.5951	0.152	9e-05
1	95613499	rs12036706	C	T	TMEM56	0.109	-0.099374	0.206674	0.630682	0.105	-1.29801	0.323721	6.48589e-05	0.1078	-0.4465	0.1742	0.01038
1	95615554	rs12085822	A	G	TMEM56	0.11	-0.0999892	0.206287	0.627924	0.106	-1.30958	0.320117	4.60586e-05	0.1088	-0.4549	0.1734	0.008705
1	95625542	rs140919425	C	T	TMEM56	0.923	0.00856374	0.246989	0.972344	0.932	1.53984	0.385162	6.81108e-05	0.9256	0.4548	0.2079	0.02872
1	95638467	rs58179905	T	TTAG	TMEM56	0.034	1.32549	0.353285	0.00017936	0.04	0.827087	0.502504	0.10006	0.036	1.1606	0.289	5.922e-05
1	95640388	rs12060846	A	G	TMEM56	0.924	0.0330612	0.248259	0.894068	0.93	1.4951	0.382622	9.88743e-05	0.9258	0.4662	0.2083	0.02518
1	95692107	rs74105310	C	G	TMEM56-RWDD3	0.965	-1.25473	0.351299	0.000361175	0.957	-0.834286	0.491809	0.0900969	0.9623	-1.1127	0.2859	9.926e-05
1	95728993	rs74102206	C	T		0.034	1.34733	0.35393	0.000144076	0.041	0.780467	0.501491	0.119922	0.0363	1.1589	0.2892	6.135e-05
1	95946781	rs144173885	A	AT		0.1	0.0421388	0.216255	0.845521	0.09	-1.37744	0.346133	7.35217e-05	0.0972	-0.3564	0.1834	0.05198
1	95948066	rs10489559	A	G		0.9	-0.0421388	0.216255	0.845521	0.91	1.39085	0.345122	5.95596e-05	0.9028	0.3619	0.1833	0.0483
1	95953929	rs147272477	A	G		0.899	-0.00802057	0.216073	0.970392	0.91	1.37327	0.34578	7.60021e-05	0.9021	0.3799	0.1832	0.03816
1	96163819	rs3108716	A	G		0.496	0.449812	0.127906	0.0004444	0.521	0.395047	0.197763	0.0460053	0.5034	0.4337	0.1074	5.396e-05
1	96163846	rs3120039	C	G		0.496	0.449812	0.127906	0.0004444	0.521	0.395047	0.197763	0.0460053	0.5034	0.4337	0.1074	5.396e-05
1	96168026	rs1931248	C	T		0.501	-0.457301	0.127489	0.000340746	0.473	-0.380206	0.198845	0.0561233	0.4928	-0.4348	0.1073	5.086e-05
1	96168101	rs1931249	C	T		0.501	-0.45276	0.127455	0.000388693	0.473	-0.378687	0.198989	0.0572916	0.4929	-0.4312	0.1073	5.876e-05
1	104880306	rs58421001	A	T		0.967	-1.01043	0.35693	0.00467768	0.966	-1.65169	0.557045	0.00309037	0.9667	-1.1971	0.3005	6.798e-05
1	104884799	rs7542095	G	T		0.967	-1.01043	0.35693	0.00467768	0.966	-1.65169	0.557045	0.00309037	0.9667	-1.1971	0.3005	6.798e-05
1	106009417	rs147913969	A	G		0.024	1.22535	0.425579	0.00401886	0.019	1.99685	0.718405	0.00553476	0.0227	1.4258	0.3662	9.865e-05
1	107313610	rs11184985	C	T		0.309	-0.391058	0.139057	0.00495726	0.309	-0.603531	0.211102	0.00432964	0.309	-0.4554	0.1161	8.811e-05
1	108576267	rs9803640	A	C		0.146	-0.772048	0.178947	1.66054e-05	0.14	0.0158582	0.29149	0.956623	0.1444	-0.5564	0.1525	0.0002639
1	108576684	rs6692571	A	G		0.146	-0.772048	0.178947	1.66054e-05	0.14	-0.00526125	0.291633	0.98561	0.1444	-0.5623	0.1525	0.0002271
1	108582810	rs11185240	A	G		0.856	0.743558	0.18023	3.81446e-05	0.863	-0.081063	0.292235	0.781532	0.8579	0.5163	0.1534	0.000763
1	108583025	rs11185241	C	T		0.141	-0.73786	0.182695	5.53039e-05	0.134	0.0571899	0.295142	0.846391	0.1391	-0.5176	0.1553	0.000862
1	108665658	rs11185276	C	T		0.789	0.609871	0.148105	3.94494e-05	NA	NA	NA	NA	0.789	0.6099	0.1481	3.825e-05
1	108666241	rs11185277	A	G		0.736	0.563546	0.141775	7.23288e-05	0.754	0.312786	0.231908	0.177691	0.7409	0.4953	0.121	4.224e-05
1	108666504	rs746833	A	G		0.183	-0.653814	0.163187	6.33568e-05	NA	NA	NA	NA	0.183	-0.6538	0.1632	6.162e-05
1	108667053	rs9803656	C	T		0.183	-0.661669	0.16319	5.17092e-05	NA	NA	NA	NA	0.183	-0.6617	0.1632	5.022e-05
1	108668545	rs9803669	A	T		0.816	0.669544	0.163089	4.16182e-05	NA	NA	NA	NA	0.816	0.6695	0.1631	4.036e-05
1	108672976	rs34036361	C	T		0.827	0.674006	0.167898	6.12971e-05	NA	NA	NA	NA	0.827	0.674	0.1679	5.96e-05
1	109187753	rs114611445	C	T		0.962	1.34769	0.339674	7.45815e-05	NA	NA	NA	NA	0.962	1.3477	0.3397	7.26e-05
1	109197265	rs77492030	A	G	HENMT1	0.037	-1.38682	0.3455	6.1414e-05	NA	NA	NA	NA	0.037	-1.3868	0.3455	5.971e-05
1	109707471	rs143055770	A	T	KIAA1324	0.974	0.96119	0.400862	0.0165642	0.976	2.29497	0.638005	0.000335894	0.9746	1.3387	0.3394	8.013e-05
1	109847929	rs3861916	C	T	MYBPHL	0.909	0.654665	0.224025	0.0035049	0.918	1.10751	0.356409	0.00193504	0.9115	0.7829	0.1897	3.663e-05
1	113498896	rs60958518	G	GGCCGCC	SLC16A1	0.868	0.216597	0.192392	0.260349	0.872	1.19007	0.301031	8.19348e-05	0.8692	0.4989	0.1621	0.002087
1	115859106	rs114985368	A	G	NGF	0.976	1.21574	0.409413	0.00301069	0.973	1.51906	0.581734	0.00914222	0.975	1.3162	0.3348	8.451e-05
1	115860362	rs114714800	G	T	NGF	0.025	-1.20628	0.406287	0.00301479	0.027	-1.49693	0.585498	0.0106992	0.0257	-1.3008	0.3338	9.745e-05
1	115860699	rs79686953	C	G	NGF	0.025	-1.20628	0.406287	0.00301479	0.027	-1.49693	0.585498	0.0106992	0.0257	-1.3008	0.3338	9.745e-05
1	115860842	rs114253799	A	G	NGF	0.025	-1.20628	0.406287	0.00301479	0.027	-1.49693	0.585498	0.0106992	0.0257	-1.3008	0.3338	9.745e-05
1	115860942	rs76665178	C	T	NGF	0.025	-1.20628	0.406287	0.00301479	0.027	-1.49693	0.585498	0.0106992	0.0257	-1.3008	0.3338	9.745e-05
1	118229313	rs61069330	C	T		0.035	1.58319	0.352939	7.5843e-06	0.037	-0.25735	0.523425	0.623053	0.0356	1.0079	0.2926	0.0005724
1	118325775	rs73006400	C	G		0.036	1.62209	0.343209	2.40984e-06	0.034	-0.393549	0.539648	0.46599	0.0354	1.0416	0.2896	0.0003223
1	118336229	rs73008116	C	T		0.964	-1.58041	0.342753	4.20413e-06	0.966	0.393549	0.539648	0.46599	0.9646	-1.013	0.2893	0.0004631
1	120228195	rs12072780	C	T	PHGDH	0.772	0.561259	0.154418	0.000283758	0.772	0.724782	0.239676	0.00255164	0.772	0.6092	0.1298	2.689e-06
1	120234328	rs140306959	C	CACAA	PHGDH	0.224	-0.493684	0.154762	0.00143997	0.224	-0.710531	0.242579	0.00346904	0.224	-0.5564	0.1305	2.002e-05
1	120238945	rs113596296	C	G	PHGDH	0.228	-0.533376	0.15467	0.000572775	0.228	-0.723151	0.240448	0.00269301	0.228	-0.5889	0.1301	5.974e-06
1	120242476	rs12086499	A	C	PHGDH	0.224	-0.49778	0.155077	0.00134415	0.224	-0.686263	0.242236	0.004694	0.224	-0.5526	0.1306	2.328e-05
1	158634652	rs73018281	C	T	SPTA1	0.972	-0.272917	0.385593	0.479144	0.972	2.34361	0.58246	6.11727e-05	0.972	0.5244	0.3215	0.1029
1	158634856	rs7542279	C	T	SPTA1	0.972	-0.272917	0.385593	0.479144	0.972	2.34361	0.58246	6.11727e-05	0.972	0.5244	0.3215	0.1029
1	158636725	rs58195064	A	C	SPTA1	0.028	0.186032	0.388369	0.631973	0.028	-2.34361	0.58246	6.11727e-05	0.028	-0.5925	0.3231	0.06671
1	158638398	rs73018289	A	C	SPTA1	0.972	-0.0262871	0.388291	0.94603	0.972	2.45106	0.586033	3.11027e-05	0.972	0.7295	0.3237	0.02422
1	158639046	rs6427441	C	T	SPTA1	0.972	-0.0262871	0.388291	0.94603	0.972	2.45106	0.586033	3.11027e-05	0.972	0.7295	0.3237	0.02422
1	158640150	rs114803559	A	G	SPTA1	0.969	0.0021576	0.363577	0.995266	0.968	2.20343	0.563338	9.73194e-05	0.9687	0.6495	0.3055	0.0335
1	158653352	rs116321541	C	T	SPTA1	0.028	0.0484405	0.385035	0.899894	0.03	-2.5266	0.58119	1.50433e-05	0.0286	-0.737	0.321	0.02167
1	158654440	rs114036989	A	G	SPTA1	0.972	0.0278497	0.382947	0.942031	0.97	2.63765	0.580069	6.03302e-06	0.9714	0.82	0.3196	0.01029
1	158658476	rs142087212	A	G		0.028	-0.0406279	0.385585	0.916093	0.029	-2.78349	0.587729	2.46052e-06	0.0283	-0.866	0.3224	0.007231
1	158661285	rs147539155	A	G		0.972	-0.0544651	0.389062	0.888678	0.972	2.84769	0.591635	1.68929e-06	0.972	0.8217	0.3251	0.01148
1	158672890	rs200614017	T	TC		0.972	-0.0365872	0.387724	0.924827	0.972	2.70888	0.591857	5.24868e-06	0.972	0.7878	0.3243	0.01513
1	158681311	rs2021660	C	T		0.972	0.0140087	0.384406	0.970932	0.97	2.63595	0.580152	6.13438e-06	0.9714	0.8139	0.3204	0.01109
1	158683055	rs114305868	C	T		0.972	0.0140087	0.384406	0.970932	0.97	2.63595	0.580152	6.13438e-06	0.9714	0.8139	0.3204	0.01109
1	158694248	rs116342313	G	T		0.971	0.0759009	0.378423	0.841049	0.97	2.52624	0.576849	1.30225e-05	0.9707	0.8131	0.3164	0.01017
1	158725776	rs7540963	A	T		0.958	-0.0809158	0.32005	0.800426	0.961	2.2427	0.505805	1.01688e-05	0.9589	0.5834	0.2705	0.03099
1	158744090	rs16841088	A	G		0.09	-0.881575	0.224561	8.87177e-05	NA	NA	NA	NA	0.09	-0.8816	0.2246	8.646e-05
1	160792263	rs551882	A	C	LY9	0.596	-0.110719	0.127624	0.385725	0.59	-0.809141	0.207094	9.90331e-05	0.5943	-0.303	0.1086	0.005297
1	162257491	rs59636124	C	T	NOS1AP	0.071	1.00211	0.248045	5.50011e-05	0.067	0.474369	0.402063	0.238316	0.0699	0.8566	0.2111	4.953e-05
1	162260135	rs375167307	G	GACAGATGAATGC	NOS1AP	0.07	0.956318	0.251591	0.000147395	0.066	0.549231	0.406712	0.177157	0.0689	0.8437	0.214	8.047e-05
1	162918744	rs114490356	C	T		0.052	0.23992	0.290415	0.408808	0.035	-2.29403	0.525591	1.39149e-05	0.048	-0.3528	0.2542	0.1652
1	162937035	rs10917657	A	G		0.836	0.498434	0.172355	0.00386125	0.817	-1.00451	0.257217	9.97656e-05	0.8301	0.0327	0.1432	0.8193
1	166783731	rs112462156	C	T		0.105	-0.196768	0.21018	0.349264	0.115	-1.31675	0.309708	2.3005e-05	0.1082	-0.5499	0.1739	0.001566
1	166784800	rs111556897	G	T		0.903	0.124915	0.218658	0.567861	0.895	1.40235	0.3267	1.92076e-05	0.9005	0.5201	0.1817	0.004206
1	166785841	rs75402425	C	T		0.896	0.20148	0.210811	0.339293	0.886	1.30165	0.310533	2.98837e-05	0.8928	0.5486	0.1744	0.00166
1	166786021	rs78568898	A	G		0.104	-0.194317	0.211006	0.357185	0.114	-1.30165	0.310533	2.98837e-05	0.1072	-0.5441	0.1745	0.001824
1	166790555	rs79860273	A	G		0.097	-0.112734	0.219461	0.607516	0.105	-1.40024	0.325839	1.87968e-05	0.0995	-0.5145	0.182	0.004703
1	166793634	rs111468583	A	G		0.905	0.153468	0.22106	0.487598	0.895	1.38226	0.326257	2.45544e-05	0.9019	0.5401	0.183	0.003165
1	166796064	rs77639778	C	G		0.905	0.165894	0.221315	0.453574	0.895	1.38226	0.326257	2.45544e-05	0.9018	0.5492	0.1832	0.002711
1	172247500		G	GGAAGAAGAAGAA	DNM3	0.791	-0.634713	0.161815	8.99365e-05	0.8	-0.000417628	0.249601	0.998665	0.7937	-0.447	0.1358	0.000994
1	172288658	rs572947037	C	T	DNM3	0.973	-1.5502	0.388765	6.86286e-05	0.983	0.242209	0.766806	0.752163	0.975	-1.1837	0.3467	0.0006409
1	175000031	rs76613147	C	T		0.947	0.0542503	0.284945	0.84902	0.956	1.8539	0.472264	9.18343e-05	0.9494	0.5346	0.244	0.02845
1	177156815	rs556482	A	G	BRINP2	0.164	-0.185703	0.172089	0.280638	0.152	1.12605	0.279974	6.15961e-05	0.1607	0.174	0.1466	0.2353
1	178957829	rs11802968	A	G		0.814	0.65719	0.169596	0.000109266	0.832	0.463956	0.278765	0.0963291	0.8189	0.605	0.1449	2.973e-05
1	178996881	rs57601259	A	G	FAM20B	0.942	1.10195	0.277886	7.5238e-05	0.934	-0.386088	0.392104	0.325006	0.9393	0.6044	0.2267	0.007676
1	193772955	rs2887813	G	T		0.1	0.879622	0.214816	4.35588e-05	0.099	0.458654	0.335241	0.171547	0.0997	0.7571	0.1809	2.841e-05
1	194811343	rs12126644	A	G		0.732	-0.375902	0.146211	0.0101972	0.742	-0.756589	0.231669	0.00112472	0.7348	-0.4843	0.1236	8.959e-05
1	194817105	rs12127306	A	G		0.731	-0.374926	0.146507	0.0105506	0.739	-0.798751	0.230675	0.000555138	0.7333	-0.4967	0.1237	5.902e-05
1	194820660	rs73060425	C	T		0.731	-0.377691	0.146629	0.0100554	0.74	-0.811867	0.231143	0.000461875	0.7336	-0.5023	0.1238	4.98e-05
1	199646950	rs962923	G	T		0.825	0.165247	0.170522	0.332604	0.854	1.09644	0.275804	7.47792e-05	0.833	0.4228	0.145	0.003559
1	199647831	rs201418050	T	TA		0.826	0.162462	0.171134	0.342544	0.855	1.09743	0.275953	7.43301e-05	0.8341	0.4222	0.1454	0.003699
1	202034271	rs9427726	C	T		0.606	0.261753	0.133006	0.0491776	0.591	0.943448	0.203158	3.82572e-06	0.6015	0.4663	0.1113	2.787e-05
1	202037007	rs6661833	A	C		0.615	0.168615	0.133378	0.206276	0.615	0.965778	0.206488	3.26516e-06	0.615	0.4033	0.112	0.0003186
1	202043774	rs7551002	C	T		0.606	0.1857	0.132269	0.160452	0.611	1.00469	0.203878	9.57203e-07	0.6075	0.4283	0.111	0.0001135
1	204943991	rs2246661	C	T	NFASC	0.655	-0.543527	0.133326	4.70667e-05	0.65	0.339527	0.20781	0.102575	0.6535	-0.286	0.1122	0.01081
1	208262192	rs2498025	A	G	PLXNA2	0.539	-0.345046	0.128799	0.00743229	0.532	-0.607691	0.198896	0.00230169	0.5369	-0.4226	0.1081	9.254e-05
1	208263599	rs2478807	A	T	PLXNA2	0.467	0.392341	0.128705	0.00232409	0.473	0.605016	0.197615	0.00225436	0.4688	0.4557	0.1078	2.387e-05
1	208265612	rs2478806	G	T	PLXNA2	0.465	0.395857	0.128563	0.00209817	0.47	0.581164	0.19758	0.00333478	0.4665	0.451	0.1078	2.851e-05
1	208266862	rs2498020	C	T	PLXNA2	0.425	0.361176	0.130916	0.0058415	0.428	0.60537	0.203771	0.00303359	0.4259	0.4325	0.1101	8.605e-05
1	208274114	rs2478819	C	T	PLXNA2	0.465	0.387913	0.128823	0.00262738	0.463	0.51582	0.198842	0.00960757	0.4644	0.4257	0.1081	8.227e-05
1	210039902	rs11119356	A	C		0.91	-0.317803	0.224326	0.156691	0.91	-1.32816	0.336935	8.58792e-05	0.91	-0.6281	0.1867	0.0007687
1	210041206	rs12410900	A	G		0.085	0.329128	0.228768	0.150358	0.086	1.35163	0.342549	8.45099e-05	0.0853	0.6445	0.1902	0.0007045
1	210135762	rs74764963	A	G	SYT14	0.966	0.298013	0.357142	0.404111	0.969	2.19792	0.5563	8.27357e-05	0.9669	0.8525	0.3005	0.004559
1	210171367		G	T	SYT14	0.907	-0.741433	0.221158	0.000812362	0.92	-0.793179	0.367606	0.0311654	0.9105	-0.7552	0.1895	6.747e-05
1	210326313	rs78313107	C	T	SYT14	0.033	-0.340077	0.37011	0.358257	0.03	-2.21773	0.563793	8.8857e-05	0.0321	-0.9056	0.3094	0.003424
1	210366197	rs139474151	C	T		0.033	-0.362903	0.368013	0.324169	0.032	-2.14933	0.546011	8.78292e-05	0.0327	-0.9209	0.3052	0.002546
1	210401341	rs11119446	A	T		0.86	0.467501	0.185158	0.0116335	0.87	1.02786	0.294598	0.000503718	0.8628	0.6262	0.1568	6.487e-05
1	210401713	rs76389247	C	G		0.856	0.461646	0.183866	0.0121073	0.867	0.975878	0.29358	0.000916032	0.8591	0.6065	0.1558	9.931e-05
1	210401901	rs75957166	C	T		0.86	0.467501	0.185158	0.0116335	0.87	1.02786	0.294598	0.000503718	0.8628	0.6262	0.1568	6.487e-05
1	216735534	rs6693327	C	T	ESRRG	0.064	0.0138052	0.264398	0.958363	0.055	-1.81528	0.43993	3.96096e-05	0.0616	-0.4716	0.2266	0.03745
1	216739291	rs11572775	C	T	ESRRG	0.053	-0.160323	0.287782	0.577508	0.053	-1.95161	0.444424	1.23389e-05	0.053	-0.6895	0.2416	0.004311
1	216739326		G	GTT	ESRRG	NA	NA	NA	NA	0.917	1.6591	0.355401	3.40695e-06	0.917	1.6591	0.3554	3.038e-06
1	216740499	rs11572768	A	G	ESRRG	0.053	-0.160323	0.287782	0.577508	0.053	-1.95503	0.445983	1.27743e-05	0.053	-0.6879	0.2418	0.004443
1	216742025	rs11572764	A	T	ESRRG	0.947	0.160323	0.287782	0.577508	0.946	1.92563	0.438795	1.24993e-05	0.9467	0.6913	0.2406	0.004071
1	216751518	rs35508539	A	G	ESRRG	0.053	-0.160323	0.287782	0.577508	0.054	-1.85489	0.437853	2.45969e-05	0.0533	-0.6715	0.2405	0.005233
1	216755815	rs11572747	A	G	ESRRG	0.053	-0.160323	0.287782	0.577508	0.054	-1.85489	0.437853	2.45969e-05	0.0533	-0.6715	0.2405	0.005233
1	216756440	rs11572745	C	T	ESRRG	0.944	0.19678	0.279816	0.481965	0.944	1.81791	0.427612	2.30324e-05	0.944	0.6828	0.2341	0.003542
1	216759043	rs72737313	A	C	ESRRG	0.056	-0.19678	0.279816	0.481965	0.056	-1.81791	0.427612	2.30324e-05	0.056	-0.6828	0.2341	0.003542
1	216759925	rs113866269	C	T	ESRRG	0.055	-0.161104	0.281955	0.56779	0.055	-1.87769	0.429478	1.34613e-05	0.055	-0.6781	0.2357	0.004014
1	216761623	rs72737316	A	T	ESRRG	0.944	0.19678	0.279816	0.481965	0.944	1.81791	0.427612	2.30324e-05	0.944	0.6828	0.2341	0.003542
1	216762646	rs72737323	A	G	ESRRG	0.944	0.19678	0.279816	0.481965	0.944	1.86531	0.429007	1.49969e-05	0.944	0.6948	0.2344	0.003033
1	216767476	rs55635948	C	T	ESRRG	0.061	-0.14082	0.267782	0.59902	0.06	-1.7225	0.412926	3.26186e-05	0.0607	-0.6091	0.2247	0.00671
1	216770715	rs72737326	C	T	ESRRG	0.944	0.229851	0.280237	0.412178	0.944	1.86564	0.429029	1.49614e-05	0.944	0.7191	0.2346	0.002179
1	216771137	rs150316872	T	TA	ESRRG	0.056	-0.229851	0.280237	0.412178	0.056	-1.86564	0.429029	1.49614e-05	0.056	-0.7191	0.2346	0.002179
1	216771649	rs1833039	C	T	ESRRG	0.944	0.229851	0.280237	0.412178	0.944	1.86564	0.429029	1.49614e-05	0.944	0.7191	0.2346	0.002179
1	216773493	rs72737330	C	T	ESRRG	0.056	-0.229851	0.280237	0.412178	0.056	-1.87082	0.427485	1.32021e-05	0.056	-0.7231	0.2344	0.002034
1	216773887		A	G	ESRRG	0.052	-0.0690683	0.289011	0.811139	0.054	-1.72066	0.436227	8.4993e-05	0.0526	-0.5729	0.2409	0.01742
1	216774662	rs114072364	A	G	ESRRG	0.056	-0.229851	0.280237	0.412178	0.056	-1.87082	0.427485	1.32021e-05	0.056	-0.7231	0.2344	0.002034
1	216777379	rs72737332	A	G	ESRRG	0.052	-0.0690683	0.289011	0.811139	0.053	-1.80813	0.438984	4.0884e-05	0.0523	-0.5949	0.2414	0.01372
1	222691975	rs142041403	C	T		0.978	-1.81819	0.432844	2.75292e-05	NA	NA	NA	NA	0.978	-1.8182	0.4328	2.663e-05
1	222718736	rs147689036	A	G	HHIPL2	0.021	1.76208	0.436641	5.6062e-05	NA	NA	NA	NA	0.021	1.7621	0.4366	5.448e-05
1	224547952	rs7513208	A	G	CNIH4	0.801	-0.0248519	0.16096	0.877309	0.795	0.959278	0.242076	7.88171e-05	0.7992	0.2769	0.134	0.03887
1	224564490	rs34467372	T	TTA	CNIH4	0.198	-0.00206986	0.160733	0.989726	0.201	-1.02243	0.242152	2.61551e-05	0.1989	-0.3141	0.1339	0.01899
1	224566216	rs11586729	A	G	CNIH4	0.802	0.00206986	0.160733	0.989726	0.799	0.996892	0.242211	4.14284e-05	0.8011	0.3062	0.1339	0.02223
1	224572573	rs12740255	C	T		0.802	0.00206986	0.160733	0.989726	0.798	0.984858	0.242123	5.08478e-05	0.8008	0.3027	0.1339	0.0238
1	224575018	rs17503938	C	T	WDR26	0.802	0.00206986	0.160733	0.989726	0.799	0.996892	0.242211	4.14284e-05	0.8011	0.3062	0.1339	0.02223
1	229983049	rs6692449	C	T		0.587	0.556162	0.14204	9.25383e-05	0.562	0.315369	0.210982	0.135259	0.5792	0.4811	0.1178	4.449e-05
1	229984050	rs6587357	A	G		0.4	-0.538432	0.143608	0.000181205	0.413	-0.311775	0.212403	0.142427	0.4041	-0.4673	0.119	8.559e-05
1	229984940	rs6696146	A	G		0.402	-0.545831	0.143446	0.000145013	0.414	-0.303132	0.212919	0.154814	0.4057	-0.4701	0.119	7.774e-05
1	229985150	rs67811517	T	TA		0.429	-0.552349	0.141111	9.30145e-05	0.438	-0.199748	0.208115	0.337366	0.4318	-0.4413	0.1168	0.0001578
1	232562732	rs10910460	C	T	SIPA1L2	0.127	0.776436	0.190727	4.82323e-05	NA	NA	NA	NA	0.127	0.7764	0.1907	4.683e-05
1	236565625	rs61833988	C	T	EDARADD	0.662	-0.11709	0.134876	0.385406	0.679	-0.868599	0.207323	3.01558e-05	0.6671	-0.3406	0.1131	0.002592
1	236567438	rs592627	A	C	EDARADD	0.662	-0.125345	0.134951	0.35307	0.676	-0.825334	0.206862	7.04538e-05	0.6662	-0.3343	0.113	0.003098
1	236569952	rs624507	A	G	EDARADD	0.344	0.10926	0.133255	0.412332	0.339	0.812114	0.203236	6.86821e-05	0.3425	0.3206	0.1114	0.004019
1	236573260	rs645507	A	G	EDARADD	0.633	-0.12693	0.130993	0.332645	0.639	-0.811316	0.200044	5.34665e-05	0.6348	-0.3323	0.1096	0.002426
1	236579353	rs597701	C	T	EDARADD	0.593	-0.174219	0.127985	0.173554	0.601	-0.83027	0.197989	2.96473e-05	0.5954	-0.3676	0.1075	0.0006268
1	236585047	rs667228	C	T	EDARADD	0.586	-0.146848	0.127736	0.250404	0.589	-0.906563	0.194896	3.68995e-06	0.5869	-0.3751	0.1068	0.0004459
1	237486945	rs974892	C	T	RYR2	0.688	0.551502	0.140581	8.97229e-05	NA	NA	NA	NA	0.688	0.5515	0.1406	8.744e-05
1	238790796		A	AC		0.689	0.551144	0.13992	8.39887e-05	0.657	0.0268818	0.213445	0.8998	0.6794	0.3936	0.117	0.0007701
1	239240856	rs115769604	A	G		0.964	1.39075	0.340215	4.48647e-05	0.969	0.162362	0.563629	0.77335	0.9653	1.0627	0.2913	0.0002637
1	240744020	rs79662074	A	G	GREM2	0.039	1.30241	0.325855	6.59787e-05	NA	NA	NA	NA	0.039	1.3024	0.3259	6.418e-05
1	246648135	rs12565415	C	T	SMYD3	0.429	-0.565741	0.130569	1.52788e-05	0.435	0.143617	0.202531	0.478404	0.4308	-0.3575	0.1097	0.001124
1	246657165	rs12038711	C	T	SMYD3	0.288	-0.57043	0.14245	6.39238e-05	0.304	-0.213001	0.21792	0.32857	0.2928	-0.4634	0.1192	0.0001016
1	246667176	rs10754519	A	C	SMYD3	0.606	-0.528771	0.134549	8.71909e-05	0.609	-0.0527016	0.210373	0.802235	0.6069	-0.3906	0.1133	0.0005696
1	247287269	rs78802037	C	T	ZNF124	0.369	-0.020906	0.133911	0.875951	0.359	0.789102	0.201089	9.23701e-05	0.3659	0.2279	0.1115	0.04084
1	247393142	rs12145632	C	T		0.041	-1.29703	0.326919	7.46301e-05	NA	NA	NA	NA	0.041	-1.297	0.3269	7.265e-05
2	1322193	rs4927637	A	G	SNTG2	0.881	-0.0529113	0.199442	0.790802	0.887	1.27454	0.308603	3.89844e-05	0.8828	0.3382	0.1675	0.0435
2	6925649	rs1876104	A	C		0.883	0.841341	0.208422	5.578e-05	NA	NA	NA	NA	0.883	0.8413	0.2084	5.42e-05
2	7527614	rs61317150	C	T		0.14	0.0948062	0.186109	0.610508	0.143	-1.13193	0.28909	9.57061e-05	0.1409	-0.2646	0.1565	0.09081
2	10377487	rs79879939	C	G		0.833	0.0842954	0.174435	0.628961	0.854	1.12715	0.274527	4.3237e-05	0.839	0.3842	0.1472	0.009059
2	15776781	rs144825128	A	C		0.02	1.58605	0.452594	0.000465508	0.016	1.49604	0.76771	0.0515813	0.019	1.5628	0.3899	6.112e-05
2	15787379	rs187113115	A	G		0.021	1.5461	0.450571	0.000609889	0.016	1.49604	0.76771	0.0515813	0.0197	1.5333	0.3886	7.955e-05
2	22873486	rs923054	C	T		0.876	-0.837981	0.193742	1.5815e-05	0.873	0.361951	0.295116	0.220281	0.8751	-0.4766	0.162	0.003255
2	22881278	rs58611583	A	G		0.876	-0.841591	0.193448	1.41114e-05	0.87	0.368022	0.293994	0.210906	0.8742	-0.4761	0.1616	0.003217
2	22883689	rs72796597	A	G		0.124	0.843133	0.19396	1.43392e-05	0.131	-0.417177	0.293352	0.155275	0.1261	0.4598	0.1618	0.004488
2	22895192	rs1484675	C	T		0.809	-0.660856	0.16311	5.23704e-05	0.802	0.368052	0.243261	0.130566	0.8068	-0.3417	0.1355	0.01165
2	22895244	rs1484674	G	T		0.193	0.649577	0.162568	6.6303e-05	0.201	-0.36847	0.240628	0.125982	0.1955	0.3305	0.1347	0.01414
2	23704644	rs4665216	A	G	KLHL29	0.709	-0.469926	0.137661	0.000650897	0.698	-0.818087	0.21337	0.00013307	0.7058	-0.5723	0.1157	7.534e-07
2	23705676	rs1465677	A	G	KLHL29	0.726	-0.35342	0.140711	0.0120764	0.703	-0.780673	0.215722	0.000309146	0.7191	-0.4809	0.1179	4.488e-05
2	30891663	rs78798179	A	C		0.02	-1.22705	0.456719	0.00726329	0.019	-2.34099	0.726746	0.00131351	0.0197	-1.5424	0.3867	6.643e-05
2	30892752	rs140609430	A	G		0.021	-1.2355	0.454757	0.0066351	0.019	-2.34099	0.726746	0.00131351	0.0204	-1.5466	0.3855	6.026e-05
2	35623907	rs72862107	A	T		0.071	0.963468	0.253646	0.00014895	0.064	0.537203	0.403232	0.183053	0.069	0.8426	0.2147	8.687e-05
2	35718102	rs146630147	C	CTAAT		0.086	0.87931	0.229904	0.00013404	0.073	0.549423	0.378414	0.146808	0.0825	0.7904	0.1965	5.756e-05
2	36278224	rs305202	A	G		0.146	-0.0608032	0.181275	0.737336	0.153	1.12175	0.271848	3.9595e-05	0.1482	0.3032	0.1508	0.04441
2	36279732	rs78965741	C	T		0.882	0.111923	0.199259	0.574373	0.888	-1.2413	0.313813	8.11893e-05	0.8837	-0.2769	0.1682	0.09974
2	40503013	rs13008638	C	T	SLC8A1	0.593	0.514583	0.131216	9.02408e-05	0.584	-0.0672675	0.198246	0.734438	0.5903	0.3373	0.1094	0.00205
2	45344075	rs115748710	G	T		0.975	-1.76867	0.411131	1.75582e-05	0.977	-0.0416427	0.672355	0.950625	0.9755	-1.2987	0.3508	0.0002135
2	45430823	rs13422973	A	G		0.027	1.57056	0.395509	7.35346e-05	NA	NA	NA	NA	0.027	1.5706	0.3955	7.158e-05
2	46470663	rs139548732	A	G		0.018	-1.91436	0.488338	9.07914e-05	NA	NA	NA	NA	0.018	-1.9144	0.4883	8.849e-05
2	59157443	rs10196460	A	C		0.138	0.723386	0.185505	9.88259e-05	0.14	-0.00884328	0.283152	0.97509	0.1386	0.5035	0.1552	0.001175
2	59175715	rs7570457	C	T		0.13	0.749334	0.190921	8.90606e-05	0.136	-0.0355973	0.288113	0.901691	0.1318	0.5098	0.1591	0.001358
2	59177184	rs3927939	C	G		0.134	0.763261	0.187305	4.74106e-05	0.136	-0.0325951	0.288196	0.909971	0.1346	0.5269	0.1571	0.0007933
2	59181150	rs10193658	C	G		0.865	-0.758553	0.18686	5.06447e-05	0.862	0.0663266	0.286087	0.816704	0.8641	-0.5119	0.1564	0.001068
2	59183439	rs7586333	A	G		0.134	0.764567	0.187714	4.78008e-05	0.137	-0.0599791	0.287618	0.834848	0.1349	0.5183	0.1572	0.0009776
2	59742885	rs78031983	C	G		0.97	-1.69382	0.37642	7.10265e-06	0.98	0.511488	0.722527	0.479146	0.9721	-1.223	0.3338	0.0002487
2	59752940	rs374508201	T	TTC		0.034	1.52053	0.348704	1.34833e-05	0.023	-0.802164	0.672734	0.233361	0.0317	1.0286	0.3096	0.0008917
2	59760776	rs146682329	C	T		0.982	-2.0898	0.4836	1.60949e-05	0.986	0.584978	0.854018	0.493505	0.983	-1.4404	0.4208	0.0006198
2	59769723	rs114043194	A	C		0.018	2.24821	0.496161	6.13139e-06	0.013	-0.476461	0.867962	0.583155	0.0168	1.5772	0.4307	0.0002508
2	59771842	rs142389319	C	T		0.018	2.24821	0.496161	6.13139e-06	0.012	-0.112078	0.897474	0.90064	0.0166	1.6957	0.4342	9.417e-05
2	59772603	rs535400482	G	T		0.018	2.24821	0.496161	6.13139e-06	0.012	-0.112078	0.897474	0.90064	0.0166	1.6957	0.4342	9.417e-05
2	59773158	rs200884905	C	CA		0.982	-2.24821	0.496161	6.13139e-06	0.988	0.112078	0.897474	0.90064	0.9834	-1.6957	0.4342	9.417e-05
2	59774768	rs145607966	A	T		0.018	2.24821	0.496161	6.13139e-06	0.012	-0.112078	0.897474	0.90064	0.0166	1.6957	0.4342	9.417e-05
2	59788003	rs151210297	C	G		0.018	2.24821	0.496161	6.13139e-06	0.012	-0.115922	0.930548	0.900883	0.0167	1.7249	0.4378	8.157e-05
2	60424595	rs62142798	A	G		0.065	1.04517	0.25847	5.41612e-05	NA	NA	NA	NA	0.065	1.0452	0.2585	5.262e-05
2	67075367	rs6761039	C	T		0.855	-0.747437	0.183386	4.7251e-05	0.882	-0.239844	0.306155	0.433554	0.8621	-0.6134	0.1573	9.658e-05
2	76927827	rs72813330	C	T		0.112	0.815036	0.200073	4.76678e-05	NA	NA	NA	NA	0.112	0.815	0.2001	4.627e-05
2	76931250	rs199714699	A	G		0.108	0.792893	0.203155	9.74778e-05	NA	NA	NA	NA	0.108	0.7929	0.2032	9.505e-05
2	81839803	rs115813170	A	G		0.989	0.041984	0.618641	0.945898	0.985	3.72258	0.809805	4.77857e-06	0.9875	1.3984	0.4916	0.004448
2	81850382	rs115988493	A	G		0.979	0.210251	0.439656	0.632537	0.975	2.72662	0.638474	2.1164e-05	0.9777	1.0197	0.3621	0.004864
2	81862545	rs150541702	A	T		0.011	-0.0827756	0.613174	0.892626	0.014	-4.10599	0.83272	9.4324e-07	0.0121	-1.4973	0.4938	0.002426
2	81862550	rs116386635	A	T		0.011	-0.0827756	0.613174	0.892626	0.014	-4.10599	0.83272	9.4324e-07	0.0121	-1.4973	0.4938	0.002426
2	81868694	rs116379118	A	T		NA	NA	NA	NA	0.986	4.10599	0.83272	9.4324e-07	0.986	4.106	0.8327	8.189e-07
2	82057814	rs377721444	C	CAAAA		0.012	1.66921	0.573704	0.00365061	0.013	2.44383	0.863818	0.00475155	0.0123	1.9063	0.4779	6.638e-05
2	82070975	rs138036748	G	T		0.012	1.68905	0.578611	0.00354031	0.013	2.44383	0.863818	0.00475155	0.0123	1.9228	0.4807	6.34e-05
2	82120966	rs139229776	A	C		0.988	-1.62471	0.568582	0.00430438	0.987	-2.44675	0.866314	0.00482253	0.9877	-1.8722	0.4753	8.195e-05
2	84439048	rs73942532	A	T		0.058	0.0461835	0.27793	0.868036	0.053	-1.73797	0.440061	8.32723e-05	0.0566	-0.4626	0.235	0.04902
2	84535187	rs41524749	A	G		0.102	0.145952	0.213877	0.495042	0.086	-1.41066	0.354759	7.44811e-05	0.0977	-0.269	0.1832	0.1419
2	103201364	rs66583835	G	GA		0.649	-0.349971	0.134676	0.00941313	0.629	-0.660269	0.205066	0.00131993	0.643	-0.4435	0.1126	8.163e-05
2	111752956	rs111873927	A	T	ACOXL	0.986	-2.16099	0.537035	5.8879e-05	NA	NA	NA	NA	0.986	-2.161	0.537	5.723e-05
2	113322511	rs72946401	A	G	POLR1B	0.089	-0.202451	0.229953	0.378722	0.09	1.39453	0.355376	9.23887e-05	0.0893	0.2689	0.1931	0.1637
2	117478436	rs114966814	C	T		0.064	1.03583	0.262988	8.40973e-05	0.064	0.0915583	0.409851	0.82327	0.064	0.7604	0.2213	0.0005913
2	118959620	rs13027885	C	T		0.909	-0.669965	0.225817	0.00303636	0.917	-0.985484	0.359609	0.00623395	0.9113	-0.7592	0.1912	7.191e-05
2	118962023	rs6737192	C	T		0.909	-0.653657	0.225581	0.00379125	0.917	-0.994351	0.356764	0.00540789	0.9113	-0.751	0.1907	8.194e-05
2	127743305	rs74337157	G	T		0.025	-1.70806	0.405784	2.64925e-05	NA	NA	NA	NA	0.025	-1.7081	0.4058	2.562e-05
2	130116583		A	C		NA	NA	NA	NA	0.987	-3.38658	0.838753	5.76885e-05	0.987	-3.3866	0.8388	5.399e-05
2	130119534	rs146036655	A	G		NA	NA	NA	NA	0.013	3.46543	0.881556	8.97967e-05	0.013	3.4654	0.8816	8.458e-05
2	130123885	rs139044892	C	T		0.989	-0.534228	0.601696	0.374693	0.987	-3.46543	0.881556	8.97967e-05	0.9884	-1.4658	0.497	0.003184
2	130129374	rs556796426	A	C		NA	NA	NA	NA	0.987	-3.46543	0.881556	8.97967e-05	0.987	-3.4654	0.8816	8.458e-05
2	130134248	rs143573217	A	C		NA	NA	NA	NA	0.013	3.46543	0.881556	8.97967e-05	0.013	3.4654	0.8816	8.458e-05
2	130744125	rs138242553	A	C		0.974	-1.58637	0.398133	6.94849e-05	NA	NA	NA	NA	0.974	-1.5864	0.3981	6.761e-05
2	130751153	rs181531339	A	C		0.026	1.58637	0.398133	6.94849e-05	NA	NA	NA	NA	0.026	1.5864	0.3981	6.761e-05
2	130751324	rs139229183	A	G		0.027	1.54608	0.391338	7.99922e-05	NA	NA	NA	NA	0.027	1.5461	0.3913	7.79e-05
2	130754266	rs190925408	A	G		0.974	-1.60711	0.400909	6.27922e-05	NA	NA	NA	NA	0.974	-1.6071	0.4009	6.106e-05
2	130756009	rs115916617	C	T		0.973	-1.54608	0.391338	7.99922e-05	NA	NA	NA	NA	0.973	-1.5461	0.3913	7.79e-05
2	130756604	rs539555455	A	G		0.027	1.54608	0.391338	7.99922e-05	NA	NA	NA	NA	0.027	1.5461	0.3913	7.79e-05
2	130776259	rs116245609	A	G		0.972	-1.55196	0.390046	7.11362e-05	NA	NA	NA	NA	0.972	-1.552	0.39	6.923e-05
2	130786918	rs181108863	A	G		0.972	-1.51656	0.387096	9.16833e-05	NA	NA	NA	NA	0.972	-1.5166	0.3871	8.936e-05
2	132847981	rs12616236	A	G		0.556	0.523775	0.129772	5.59249e-05	0.543	0.050127	0.204567	0.806471	0.5523	0.3879	0.1096	0.000401
2	132848651	rs4325810	G	T		0.444	-0.524489	0.129705	5.41558e-05	0.457	-0.050127	0.204567	0.806471	0.4477	-0.3885	0.1095	0.0003907
2	132849126	rs9677709	C	T		0.556	0.524489	0.129705	5.41558e-05	0.543	0.050127	0.204567	0.806471	0.5523	0.3885	0.1095	0.0003907
2	132849219	rs62164204	C	T		0.444	-0.524489	0.129705	5.41558e-05	0.457	-0.050127	0.204567	0.806471	0.4477	-0.3885	0.1095	0.0003907
2	132850649	rs10427231	A	C		0.446	-0.51387	0.12973	7.66324e-05	NA	NA	NA	NA	0.446	-0.5139	0.1297	7.461e-05
2	132851985	rs10188637	A	G		0.444	-0.520812	0.129742	6.13436e-05	NA	NA	NA	NA	0.444	-0.5208	0.1297	5.965e-05
2	132852016	rs10182737	C	T		0.444	-0.520812	0.129742	6.13436e-05	NA	NA	NA	NA	0.444	-0.5208	0.1297	5.965e-05
2	134597590	rs75149065	A	C		0.983	2.20432	0.501532	1.15155e-05	0.985	-0.870885	0.844014	0.302373	0.9835	1.4018	0.4312	0.001149
2	149479281	rs869175119	C	CTT	EPC2	0.227	-0.598676	0.153164	9.51677e-05	NA	NA	NA	NA	0.227	-0.5987	0.1532	9.278e-05
2	150247715	rs16826936	A	G	LYPD6	0.044	-1.41923	0.312356	5.78359e-06	NA	NA	NA	NA	0.044	-1.4192	0.3124	5.529e-06
2	155172515	rs6720057	A	G	GALNT13	0.042	1.08477	0.319368	0.000692571	0.042	0.950409	0.495175	0.0551966	0.042	1.0453	0.2684	9.831e-05
2	155188070	rs7584615	C	T	GALNT13	0.96	-1.22949	0.326571	0.00017036	0.957	-1.04448	0.491065	0.0336426	0.9591	-1.1728	0.2719	1.612e-05
2	155188758	rs75651220	C	T	GALNT13	0.04	1.22949	0.326571	0.00017036	0.043	1.04448	0.491065	0.0336426	0.0409	1.1728	0.2719	1.612e-05
2	155196225	rs11686487	A	G	GALNT13	0.961	-1.26432	0.334057	0.000157373	0.957	-1.04448	0.491065	0.0336426	0.9597	-1.1948	0.2762	1.521e-05
2	155199065	rs145767882	G	GTATAT	GALNT13	0.037	1.411	0.34354	4.12868e-05	0.043	1.04448	0.491065	0.0336426	0.039	1.2906	0.2815	4.547e-06
2	155204133	rs17811332	A	G	GALNT13	0.963	-1.42413	0.344307	3.64341e-05	0.957	-1.04448	0.491065	0.0336426	0.961	-1.299	0.2819	4.07e-06
2	155208173	rs148686217	C	T	GALNT13	0.962	-1.31954	0.337896	9.65795e-05	0.959	-0.874235	0.498001	0.0794506	0.9611	-1.1792	0.2796	2.474e-05
2	165564456	rs116701782	C	T	COBLL1	0.982	1.22858	0.463846	0.00812972	0.983	2.3868	0.742508	0.00134416	0.9823	1.5537	0.3934	7.832e-05
2	165578103	rs114785656	C	T	COBLL1	0.983	1.12863	0.488813	0.0210262	0.984	3.09646	0.801323	0.000117892	0.9833	1.6623	0.4173	6.792e-05
2	167500218	rs116415115	C	T		0.929	0.9586	0.253757	0.000161908	0.933	0.58157	0.397294	0.143523	0.9302	0.8494	0.2139	7.139e-05
2	167506384	rs115269072	A	G		0.929	0.9586	0.253757	0.000161908	0.932	0.621348	0.394433	0.115473	0.9299	0.8599	0.2134	5.595e-05
2	167506619	rs114104189	A	G		0.929	0.9586	0.253757	0.000161908	0.932	0.621348	0.394433	0.115473	0.9299	0.8599	0.2134	5.595e-05
2	167506658	rs114642395	C	T		0.071	-0.9586	0.253757	0.000161908	0.068	-0.621348	0.394433	0.115473	0.0701	-0.8599	0.2134	5.595e-05
2	167509625	rs115329607	A	G		0.929	0.9586	0.253757	0.000161908	0.932	0.621348	0.394433	0.115473	0.9299	0.8599	0.2134	5.595e-05
2	167512399	rs116055968	C	T		0.071	-0.9586	0.253757	0.000161908	0.069	-0.643836	0.393426	0.102021	0.0704	-0.8661	0.2132	4.874e-05
2	167518006	rs114764712	A	G		0.929	0.966589	0.253488	0.000140418	0.931	0.643836	0.393426	0.102021	0.9296	0.8719	0.2131	4.281e-05
2	167531411	rs115095656	C	T		0.928	0.94489	0.25296	0.000191528	0.93	0.594869	0.390702	0.128151	0.9286	0.8415	0.2123	7.401e-05
2	167533725	rs116822256	C	T		0.928	0.939801	0.252317	0.00019975	0.93	0.594869	0.390702	0.128151	0.9286	0.8383	0.212	7.656e-05
2	167534459	rs114885727	A	G		0.065	-0.97518	0.263694	0.000221707	0.064	-0.747942	0.406127	0.0657924	0.0647	-0.9078	0.2212	4.05e-05
2	167538081	rs115526738	C	T		0.928	0.94489	0.25296	0.000191528	0.93	0.575905	0.389695	0.139735	0.9286	0.8355	0.2122	8.225e-05
2	169226124	rs10497339	C	G		0.423	0.534401	0.131711	5.11014e-05	0.432	0.000768749	0.204988	0.997008	0.4256	0.3785	0.1108	0.0006366
2	169226358	rs7597462	A	T		0.422	0.530516	0.132026	6.03069e-05	0.432	-0.0438254	0.206012	0.831574	0.4249	0.3633	0.1112	0.001082
2	169227645	rs10930322	A	G		0.575	-0.520652	0.132493	8.73058e-05	0.562	0.0294686	0.20519	0.885829	0.5712	-0.3588	0.1113	0.001267
2	169227855	rs10930323	C	T		0.578	-0.534551	0.132651	5.74525e-05	0.564	0.0205907	0.205156	0.920072	0.5739	-0.3709	0.1114	0.0008701
2	169824074	rs79835267	C	T	ABCB11	0.891	0.822353	0.206454	6.98675e-05	0.898	-0.18459	0.33065	0.576775	0.893	0.5399	0.1751	0.002049
2	169896560	rs55655969	A	G		0.946	-1.12018	0.281373	7.04818e-05	NA	NA	NA	NA	0.946	-1.1202	0.2814	6.859e-05
2	180262046	rs143663895	C	T		0.025	1.75194	0.404997	1.57751e-05	NA	NA	NA	NA	0.025	1.7519	0.405	1.52e-05
2	180859038	rs398080856	G	GA	CWC22	0.044	-0.236798	0.313696	0.450398	0.048	1.91571	0.451109	2.35069e-05	0.0453	0.4648	0.2575	0.07111
2	180999555	rs71713402	T	TG		0.603	-0.37024	0.128266	0.00392792	0.637	-0.621884	0.203747	0.00232533	0.6127	-0.4417	0.1085	4.725e-05
2	184805923	rs59295062	C	CAAAA		0.4	0.506496	0.129869	9.86294e-05	NA	NA	NA	NA	0.4	0.5065	0.1299	9.618e-05
2	185005977	rs1534212	A	G		0.44	0.539909	0.13744	8.77857e-05	0.42	-0.159437	0.203595	0.43373	0.4337	0.321	0.1139	0.004837
2	185006368	rs1534210	A	G		0.56	-0.539909	0.13744	8.77857e-05	0.58	0.159437	0.203595	0.43373	0.5663	-0.321	0.1139	0.004837
2	185008683	rs1526213	A	G		0.56	-0.539909	0.13744	8.77857e-05	0.58	0.159437	0.203595	0.43373	0.5663	-0.321	0.1139	0.004837
2	185008841	rs2369206	C	T		0.44	0.539909	0.13744	8.77857e-05	0.42	-0.159437	0.203595	0.43373	0.4337	0.321	0.1139	0.004837
2	185014237	rs2369211	A	C		0.44	0.539909	0.13744	8.77857e-05	0.42	-0.170714	0.204015	0.402902	0.4338	0.3181	0.114	0.005263
2	185014903	rs7560949	C	T		0.44	0.539909	0.13744	8.77857e-05	0.42	-0.159437	0.203595	0.43373	0.4337	0.321	0.1139	0.004837
2	185017243	rs398090924	G	GA		0.553	-0.536579	0.137006	9.21872e-05	0.577	0.204375	0.204344	0.317455	0.5604	-0.3068	0.1138	0.007018
2	185017926	rs2049527	C	T		0.56	-0.539909	0.13744	8.77857e-05	0.58	0.159437	0.203595	0.43373	0.5663	-0.321	0.1139	0.004837
2	185022434	rs1526207	C	T		0.44	0.539909	0.13744	8.77857e-05	0.42	-0.159437	0.203595	0.43373	0.4337	0.321	0.1139	0.004837
2	185023353	rs12993726	G	T		0.56	-0.539909	0.13744	8.77857e-05	0.58	0.159437	0.203595	0.43373	0.5663	-0.321	0.1139	0.004837
2	185023666	rs1608970	A	G		0.56	-0.539909	0.13744	8.77857e-05	0.58	0.159437	0.203595	0.43373	0.5663	-0.321	0.1139	0.004837
2	185024204	rs2887424	A	G		0.441	0.540538	0.137557	8.73418e-05	0.42	-0.159437	0.203595	0.43373	0.4344	0.3212	0.114	0.004838
2	185025183	rs4666651	C	T		0.56	-0.539909	0.13744	8.77857e-05	0.58	0.159437	0.203595	0.43373	0.5663	-0.321	0.1139	0.004837
2	185025566	rs1852287	A	G		0.44	0.539909	0.13744	8.77857e-05	0.42	-0.159437	0.203595	0.43373	0.4337	0.321	0.1139	0.004837
2	185025613	rs1852286	C	T		0.44	0.539909	0.13744	8.77857e-05	0.42	-0.159437	0.203595	0.43373	0.4337	0.321	0.1139	0.004837
2	185025957	rs12463579	C	G		0.44	0.539909	0.13744	8.77857e-05	0.42	-0.159437	0.203595	0.43373	0.4337	0.321	0.1139	0.004837
2	185034025	rs2091360	A	G		0.559	-0.541081	0.137576	8.6114e-05	0.58	0.151711	0.203459	0.45603	0.5656	-0.3237	0.114	0.004506
2	185034097	rs71011018	G	GC		0.441	0.541081	0.137576	8.6114e-05	0.42	-0.151711	0.203459	0.45603	0.4344	0.3237	0.114	0.004506
2	185037429	rs1918002	C	T		0.441	0.53601	0.137527	9.96655e-05	0.42	-0.151711	0.203459	0.45603	0.4344	0.3203	0.1139	0.004932
2	185038545	rs1526203	A	G		0.441	0.53601	0.137527	9.96655e-05	0.42	-0.151711	0.203459	0.45603	0.4344	0.3203	0.1139	0.004932
2	185038934	rs34544967	A	AAT		0.442	0.549549	0.137342	6.47649e-05	0.42	-0.151711	0.203459	0.45603	0.4351	0.33	0.1138	0.003741
2	185038946	rs5836909	A	AT		0.442	0.540917	0.137118	8.196e-05	0.42	-0.151711	0.203459	0.45603	0.4351	0.3246	0.1137	0.004309
2	185039190	rs1526200	A	G		0.559	-0.53601	0.137527	9.96655e-05	0.58	0.151711	0.203459	0.45603	0.5656	-0.3203	0.1139	0.004932
2	185043361	rs1997132	C	T		0.441	0.542511	0.137361	8.04057e-05	0.42	-0.151711	0.203459	0.45603	0.4344	0.3252	0.1138	0.004289
2	185044988	rs4550634	A	T		0.441	0.542511	0.137361	8.04057e-05	0.42	-0.151711	0.203459	0.45603	0.4344	0.3252	0.1138	0.004289
2	186206925	rs181550427	G	T		0.985	-0.041441	0.542643	0.939132	0.988	3.53895	0.89216	7.75214e-05	0.9858	0.9254	0.4636	0.04592
2	186212699	rs190948756	C	T		0.985	-0.041441	0.542643	0.939132	0.988	3.53895	0.89216	7.75214e-05	0.9858	0.9254	0.4636	0.04592
2	190392728	rs561908466	G	GC		0.989	2.35329	0.602104	9.5285e-05	NA	NA	NA	NA	0.989	2.3533	0.6021	9.29e-05
2	190392878	rs563675532	T	TTA		0.012	-2.44035	0.586944	3.31913e-05	NA	NA	NA	NA	0.012	-2.4403	0.5869	3.214e-05
2	195861164	rs10201542	G	T		0.399	-0.103631	0.137965	0.452638	0.4	-0.858432	0.214506	6.69882e-05	0.3993	-0.3245	0.116	0.005165
2	205257059	rs10804137	A	G		0.616	0.0419665	0.130316	0.74745	0.623	-0.798947	0.20344	9.12231e-05	0.618	-0.2027	0.1097	0.06473
2	205259562	rs397820860	A	AG		0.609	0.0626711	0.1297	0.628993	0.619	-0.814853	0.201572	5.65203e-05	0.6119	-0.1943	0.1091	0.0749
2	206401794	rs11684023	A	T	PARD3B	0.865	0.532925	0.190281	0.00513668	0.866	0.870588	0.283152	0.00215891	0.8653	0.638	0.1579	5.356e-05
2	206417755		A	AGAA	PARD3B	0.442	0.0905938	0.139079	0.514857	0.467	0.814721	0.206592	8.52719e-05	0.4498	0.3164	0.1154	0.006094
2	206424405	rs6748169	C	T	PARD3B	0.854	0.504182	0.184794	0.00640835	0.851	0.845705	0.273171	0.00201127	0.8531	0.6114	0.1531	6.483e-05
2	206425201		C	CTGTTT	PARD3B	0.146	-0.504182	0.184794	0.00640835	0.148	-0.865214	0.274293	0.00165166	0.1466	-0.6169	0.1533	5.693e-05
2	206429760	rs2878751	A	G	PARD3B	0.146	-0.484482	0.183991	0.00850911	0.148	-0.858175	0.274691	0.00182925	0.1466	-0.6002	0.1529	8.623e-05
2	206432944	rs78013379	A	G	PARD3B	0.119	-0.553348	0.200829	0.00590464	0.116	-0.88455	0.303382	0.00362076	0.1181	-0.6543	0.1675	9.348e-05
2	206433053	rs7349394	A	G	PARD3B	0.853	0.494966	0.183893	0.00715705	0.851	0.986846	0.274392	0.000336685	0.8524	0.6474	0.1528	2.254e-05
2	206812483	rs78077701	G	T		0.981	-1.85435	0.460334	5.78131e-05	NA	NA	NA	NA	0.981	-1.8543	0.4603	5.619e-05
2	211398363	rs73073527	C	T	CPS1	0.074	0.0214888	0.248258	0.931029	0.067	-1.54495	0.395344	9.87339e-05	0.072	-0.4215	0.2102	0.04498
2	213533430	rs151210615	A	G		0.106	-0.694416	0.209262	0.000917899	0.106	-0.749908	0.327336	0.022153	0.106	-0.7105	0.1763	5.581e-05
2	219233452	rs7586267	A	G		0.872	0.0899667	0.190808	0.637322	0.844	-1.1387	0.269427	2.56926e-05	0.8626	-0.3204	0.1557	0.03961
2	232406078	rs116416722	C	T		0.946	-0.894604	0.290608	0.00210308	0.946	-1.11827	0.44671	0.0124445	0.946	-0.9611	0.2436	7.963e-05
2	236215352	rs111690187	C	T		0.901	0.1236	0.216049	0.56731	0.891	-1.3337	0.314462	2.40778e-05	0.8978	-0.3437	0.1781	0.05359
2	238373350		G	T		0.502	0.508828	0.130486	9.88543e-05	0.492	0.0823053	0.207918	0.692288	0.4992	0.3883	0.1105	0.0004425
2	238824767	rs6725170	C	T		0.624	0.524967	0.130909	6.23965e-05	NA	NA	NA	NA	0.624	0.525	0.1309	6.068e-05
2	240226439	rs10177607	C	T	HDAC4	0.263	0.538232	0.146726	0.000249134	0.256	0.436449	0.22314	0.050722	0.2609	0.5075	0.1226	3.478e-05
2	240228163	rs7559295	A	G	HDAC4	0.281	0.49475	0.14345	0.000571791	0.271	0.427282	0.219306	0.051626	0.278	0.4745	0.12	7.723e-05
2	240229377	rs10187532	C	T	HDAC4	0.282	0.500425	0.143317	0.000487934	0.272	0.413845	0.219397	0.0595172	0.279	0.4745	0.12	7.657e-05
2	240230131	rs71663022	C	CAG	HDAC4	0.28	0.510152	0.143618	0.000388956	0.27	0.415861	0.21929	0.0581665	0.277	0.4818	0.1201	6.057e-05
2	240234667	rs10209850	C	T	HDAC4	0.719	-0.506541	0.14395	0.000440874	0.732	-0.424563	0.220641	0.0545809	0.7229	-0.4821	0.1206	6.374e-05
2	240251291	rs68080737	A	G	HDAC4	0.154	0.702819	0.179047	8.88761e-05	0.153	0.178443	0.273969	0.51497	0.1537	0.5459	0.1499	0.0002703
2	240259671	rs2018414	A	G	HDAC4	0.377	0.524175	0.133644	9.00389e-05	0.388	0.203903	0.203643	0.316908	0.3803	0.4278	0.1117	0.0001289
2	241853331	rs56331064	A	G		0.13	-0.671984	0.190966	0.000440885	0.129	-0.541418	0.305102	0.0762459	0.1297	-0.6352	0.1619	8.7e-05
3	328266	rs331875	C	G	CHL1	0.745	-0.281257	0.147218	0.0561819	0.766	0.935567	0.237156	8.48093e-05	0.7508	0.0572	0.1251	0.6474
3	329485	rs331877	A	G	CHL1	0.752	-0.309293	0.149248	0.0383331	0.771	0.956832	0.235773	5.28856e-05	0.7574	0.0529	0.1261	0.6748
3	329529	rs331878	A	C	CHL1	0.73	-0.245926	0.145223	0.0904921	0.75	0.92548	0.230103	6.15909e-05	0.7357	0.0878	0.1228	0.4749
3	331113	rs66577194	A	AT	CHL1	0.256	0.305238	0.147112	0.0380974	0.237	-0.922705	0.235997	9.79448e-05	0.2507	-0.0384	0.1248	0.7585
3	340113	rs332480	A	G	CHL1	0.809	-0.271548	0.162297	0.0944172	0.838	1.07464	0.268757	6.79273e-05	0.8167	0.0882	0.1389	0.5256
3	342788	rs414329	C	T	CHL1	0.783	-0.436848	0.156542	0.00529965	0.82	1.08459	0.256843	2.60983e-05	0.793	-0.0248	0.1337	0.8531
3	482367	rs111549579	A	G		0.87	-0.758483	0.191992	8.00445e-05	NA	NA	NA	NA	0.87	-0.7585	0.192	7.796e-05
3	483151	rs112627113	A	C		0.126	0.778412	0.19492	6.69252e-05	NA	NA	NA	NA	0.126	0.7784	0.1949	6.511e-05
3	1161939	rs34918453	A	G	CNTN6	0.927	1.01268	0.25209	6.05977e-05	NA	NA	NA	NA	0.927	1.0127	0.2521	5.891e-05
3	1300377	rs3755634	C	T	CNTN6	0.418	0.511923	0.131136	9.71298e-05	0.408	-0.316834	0.20103	0.115297	0.415	0.2645	0.1098	0.01602
3	1301789	rs9835517	A	G	CNTN6	0.484	-0.533272	0.131615	5.23377e-05	0.487	0.212129	0.199553	0.288003	0.4849	-0.3073	0.1099	0.005157
3	2641942	rs62232683	A	G	CNTN4	0.103	-0.873339	0.213839	4.55963e-05	0.098	0.142905	0.342463	0.676549	0.1016	-0.5883	0.1814	0.001182
3	3277138	rs67462182	A	C		0.048	-1.12061	0.294091	0.00014198	0.046	-0.746158	0.467418	0.110696	0.0474	-1.0144	0.2489	4.596e-05
3	3277266	rs73012998	A	G		0.048	-1.12061	0.294091	0.00014198	0.047	-0.689504	0.465428	0.138772	0.0477	-0.9976	0.2486	6.006e-05
3	3277378	rs66818011	A	G		0.952	1.12061	0.294091	0.00014198	0.953	0.689504	0.465428	0.138772	0.9523	0.9976	0.2486	6.006e-05
3	6797607	rs9855323	A	G		0.536	0.0115964	0.128963	0.928357	0.545	0.796143	0.198337	6.36656e-05	0.5387	0.2447	0.1081	0.0236
3	6797861	rs111365549	A	C		0.439	-0.0116549	0.12966	0.928383	0.435	-0.791204	0.198049	6.89423e-05	0.4378	-0.2455	0.1085	0.02361
3	7298345	rs7626293	A	C	GRM7	0.89	-0.808793	0.204445	7.82558e-05	0.867	0.330912	0.283597	0.243525	0.8821	-0.419	0.1658	0.01151
3	7299581	rs115008053	A	G	GRM7	0.923	-0.972293	0.240972	5.62169e-05	NA	NA	NA	NA	0.923	-0.9723	0.241	5.463e-05
3	7301559	rs3900134	G	T	GRM7	0.109	0.799319	0.204879	9.80771e-05	0.134	-0.388678	0.282286	0.168821	0.1176	0.3894	0.1658	0.01884
3	7303427	rs114814316	C	T	GRM7	0.081	1.00099	0.234883	2.10194e-05	NA	NA	NA	NA	0.081	1.001	0.2349	2.029e-05
3	7313187	rs191024462	A	G	GRM7	0.924	-0.948135	0.242264	9.32633e-05	0.914	0.22246	0.348631	0.523542	0.9207	-0.5669	0.1989	0.004376
3	10429745	rs150518119	A	G	ATP2B2	0.967	1.46564	0.353328	3.46068e-05	0.97	-0.0870437	0.578159	0.880355	0.9678	1.0434	0.3015	0.0005382
3	10434710	rs116029760	C	T	ATP2B2	0.967	1.52892	0.355039	1.72171e-05	0.97	0.0299924	0.581772	0.958894	0.9678	1.1222	0.3031	0.0002133
3	10435008	rs76233630	C	G	ATP2B2	0.033	-1.52892	0.355039	1.72171e-05	0.03	-0.0299924	0.581772	0.958894	0.0322	-1.1222	0.3031	0.0002133
3	10555200	rs114522697	A	T	ATP2B2	0.057	-1.07438	0.271598	7.83396e-05	NA	NA	NA	NA	0.057	-1.0744	0.2716	7.629e-05
3	10558454	rs74595702	C	G	ATP2B2	0.963	1.36854	0.337834	5.25188e-05	NA	NA	NA	NA	0.963	1.3685	0.3378	5.101e-05
3	10564322	rs115688958	A	G	ATP2B2	0.044	-1.14291	0.309076	0.000221975	0.032	-1.06763	0.552988	0.053779	0.0411	-1.125	0.2698	3.049e-05
3	11269122	rs11128544	A	G	HRH1	0.304	-0.569625	0.139985	4.85934e-05	0.316	0.100596	0.214469	0.639127	0.3076	-0.3694	0.1172	0.001626
3	11270027	rs6442240	A	G	HRH1	0.471	-0.577381	0.130367	9.86698e-06	0.472	0.30662	0.199773	0.125107	0.4713	-0.3134	0.1092	0.004102
3	12531747	rs143173105	A	AT	TSEN2	0.888	-0.0802711	0.205472	0.696075	0.893	1.2578	0.318763	8.44871e-05	0.8895	0.3125	0.1727	0.07038
3	12561698		C	T	TSEN2	0.887	0.0265053	0.205578	0.897423	0.894	1.31469	0.319798	4.2284e-05	0.889	0.4032	0.1729	0.01973
3	12562449	rs57466115	C	T	TSEN2	0.102	0.0767183	0.214895	0.721118	0.094	-1.47677	0.341504	1.66719e-05	0.0997	-0.3639	0.1819	0.0454
3	12563920	rs397959742	A	AC	TSEN2	0.898	-0.0767183	0.214895	0.721118	0.906	1.47677	0.341504	1.66719e-05	0.9003	0.3639	0.1819	0.0454
3	12567857	rs115643298	A	G	TSEN2	0.898	-0.0767183	0.214895	0.721118	0.906	1.44782	0.341673	2.44756e-05	0.9003	0.3554	0.1819	0.05072
3	12568362	rs7649852	G	T	TSEN2	0.102	0.0767183	0.214895	0.721118	0.094	-1.44782	0.341673	2.44756e-05	0.0997	-0.3554	0.1819	0.05072
3	12569968	rs6797577	C	T	TSEN2	0.898	-0.0767183	0.214895	0.721118	0.906	1.44782	0.341673	2.44756e-05	0.9003	0.3554	0.1819	0.05072
3	12648205	rs572934031	A	AT	RAF1	0.918	0.0316137	0.235826	0.893369	0.923	1.44552	0.368152	9.15158e-05	0.9195	0.443	0.1986	0.0257
3	12715171	rs573239666	A	T		0.142	0.00604191	0.185077	0.97396	0.138	-1.15816	0.283956	4.85222e-05	0.1408	-0.3411	0.1551	0.02782
3	12721425	rs17037135	A	G		0.887	-0.107038	0.202734	0.597564	0.894	1.32776	0.321198	3.83607e-05	0.889	0.3017	0.1714	0.07842
3	13321852	rs357116	A	G		0.583	-0.509799	0.128939	7.89872e-05	NA	NA	NA	NA	0.583	-0.5098	0.1289	7.692e-05
3	13441020	rs11920743	C	G	NUP210	0.516	0.519214	0.129881	6.57786e-05	0.523	0.0132514	0.197853	0.946613	0.5181	0.3668	0.1086	0.0007285
3	13442900	rs73132587	C	T	NUP210	0.525	0.546954	0.130535	2.88196e-05	0.527	0.0145863	0.197968	0.941278	0.5256	0.3856	0.109	0.0004022
3	13443327	rs9851563	A	G	NUP210	0.485	-0.523298	0.13004	5.88287e-05	0.477	-0.0114363	0.197734	0.953889	0.4826	-0.3688	0.1086	0.0006888
3	13443393	rs9813572	A	T	NUP210	0.537	0.51049	0.129959	8.78676e-05	0.548	-0.114725	0.20035	0.567014	0.5403	0.3253	0.109	0.002846
3	13446117	rs17038131	A	C	NUP210	0.482	-0.512162	0.130203	8.59005e-05	0.476	-0.00430733	0.197851	0.982635	0.4802	-0.3587	0.1088	0.0009743
3	13447830	rs9817987	C	T	NUP210	0.485	-0.523298	0.13004	5.88287e-05	0.477	-0.0114363	0.197734	0.953889	0.4826	-0.3688	0.1086	0.0006888
3	13448094	rs73132598	A	G	NUP210	0.485	-0.523298	0.13004	5.88287e-05	0.477	-0.0114363	0.197734	0.953889	0.4826	-0.3688	0.1086	0.0006888
3	13448942	rs7621547	C	T	NUP210	0.521	0.557062	0.130335	1.98887e-05	0.526	0.0217113	0.197843	0.912636	0.5225	0.395	0.1088	0.0002839
3	13449190	rs7624018	C	T	NUP210	0.521	0.557062	0.130335	1.98887e-05	0.526	0.0217113	0.197843	0.912636	0.5225	0.395	0.1088	0.0002839
3	13449191	rs7646019	A	G	NUP210	0.521	0.557062	0.130335	1.98887e-05	0.526	0.0217113	0.197843	0.912636	0.5225	0.395	0.1088	0.0002839
3	13449517	rs9828122	C	T	NUP210	0.479	-0.557062	0.130335	1.98887e-05	0.474	-0.0217113	0.197843	0.912636	0.4775	-0.395	0.1088	0.0002839
3	13450019	rs6802950	A	G	NUP210	0.521	0.561829	0.130366	1.69641e-05	0.526	0.00944775	0.198023	0.961955	0.5225	0.3948	0.1089	0.000288
3	13450157	rs6442384	A	G	NUP210	0.476	-0.540716	0.130558	3.56011e-05	0.473	-0.0145863	0.197968	0.941278	0.4751	-0.3812	0.109	0.0004688
3	13450655	rs28569149	A	G	NUP210	0.479	-0.557062	0.130335	1.98887e-05	0.474	-0.0217113	0.197843	0.912636	0.4775	-0.395	0.1088	0.0002839
3	13450743	rs28399096	C	T	NUP210	0.479	-0.557062	0.130335	1.98887e-05	0.474	-0.0217113	0.197843	0.912636	0.4775	-0.395	0.1088	0.0002839
3	13451461	rs11926015	C	T	NUP210	0.521	0.557062	0.130335	1.98887e-05	0.526	0.0217113	0.197843	0.912636	0.5225	0.395	0.1088	0.0002839
3	13451486	rs11926068	C	G	NUP210	0.479	-0.557062	0.130335	1.98887e-05	0.474	-0.0217113	0.197843	0.912636	0.4775	-0.395	0.1088	0.0002839
3	13451519	rs572532631	A	ATT	NUP210	0.48	-0.566897	0.130345	1.41935e-05	0.476	-0.0249442	0.196784	0.899154	0.4788	-0.4016	0.1087	0.0002191
3	13451860	rs112251244	C	T	NUP210	0.521	0.557062	0.130335	1.98887e-05	0.526	0.0217113	0.197843	0.912636	0.5225	0.395	0.1088	0.0002839
3	13452140	rs112018539	A	G	NUP210	0.479	-0.557062	0.130335	1.98887e-05	0.474	-0.0217113	0.197843	0.912636	0.4775	-0.395	0.1088	0.0002839
3	13452225	rs111563495	A	G	NUP210	0.479	-0.557062	0.130335	1.98887e-05	0.474	-0.0217113	0.197843	0.912636	0.4775	-0.395	0.1088	0.0002839
3	13452262	rs200133735	C	CA	NUP210	0.521	0.557062	0.130335	1.98887e-05	0.526	0.0217113	0.197843	0.912636	0.5225	0.395	0.1088	0.0002839
3	13452375	rs151028692	A	G	NUP210	0.521	0.557062	0.130335	1.98887e-05	0.526	0.0217113	0.197843	0.912636	0.5225	0.395	0.1088	0.0002839
3	13452741	rs7639336	A	G	NUP210	0.521	0.557062	0.130335	1.98887e-05	0.526	0.0217113	0.197843	0.912636	0.5225	0.395	0.1088	0.0002839
3	13453450	rs7620099	C	T	NUP210	0.521	0.557062	0.130335	1.98887e-05	0.526	0.0217113	0.197843	0.912636	0.5225	0.395	0.1088	0.0002839
3	13453495	rs7620337	A	G	NUP210	0.48	-0.550129	0.130182	2.46316e-05	0.474	-0.0217113	0.197843	0.912636	0.4782	-0.3905	0.1088	0.0003301
3	13454419	rs9881841	C	T	NUP210	0.526	0.551788	0.129906	2.2372e-05	0.532	0.0437389	0.198661	0.82578	0.5278	0.3996	0.1087	0.0002374
3	13454548	rs9882003	C	T	NUP210	0.526	0.551788	0.129906	2.2372e-05	0.532	0.0437389	0.198661	0.82578	0.5278	0.3996	0.1087	0.0002374
3	13454826	rs58336762	C	T	NUP210	0.526	0.551788	0.129906	2.2372e-05	0.532	0.0437389	0.198661	0.82578	0.5278	0.3996	0.1087	0.0002374
3	13455916	rs9812693	C	T	NUP210	0.526	0.551788	0.129906	2.2372e-05	0.532	0.0437389	0.198661	0.82578	0.5278	0.3996	0.1087	0.0002374
3	13456159	rs7640932	C	T	NUP210	0.474	-0.551788	0.129906	2.2372e-05	0.468	-0.0437389	0.198661	0.82578	0.4722	-0.3996	0.1087	0.0002374
3	13456382	rs7629627	G	T	NUP210	0.526	0.551788	0.129906	2.2372e-05	0.532	0.0437389	0.198661	0.82578	0.5278	0.3996	0.1087	0.0002374
3	13456803	rs9817742	C	T	NUP210	0.526	0.551788	0.129906	2.2372e-05	0.532	0.0437389	0.198661	0.82578	0.5278	0.3996	0.1087	0.0002374
3	13456840	rs9817766	C	T	NUP210	0.526	0.551788	0.129906	2.2372e-05	0.532	0.0437389	0.198661	0.82578	0.5278	0.3996	0.1087	0.0002374
3	13457751	rs9823289	A	G	NUP210	0.474	-0.551788	0.129906	2.2372e-05	0.468	-0.0437389	0.198661	0.82578	0.4722	-0.3996	0.1087	0.0002374
3	13457785	rs111727542	C	CTG	NUP210	0.474	-0.551788	0.129906	2.2372e-05	0.468	-0.0437389	0.198661	0.82578	0.4722	-0.3996	0.1087	0.0002374
3	13458136	rs73813583	C	T	NUP210	0.474	-0.551788	0.129906	2.2372e-05	0.468	-0.0437389	0.198661	0.82578	0.4722	-0.3996	0.1087	0.0002374
3	13458784	rs13324502	A	G	NUP210	0.526	0.551788	0.129906	2.2372e-05	0.532	0.0437389	0.198661	0.82578	0.5278	0.3996	0.1087	0.0002374
3	13459103	rs9832581	C	T	NUP210	0.526	0.551788	0.129906	2.2372e-05	0.532	0.0437389	0.198661	0.82578	0.5278	0.3996	0.1087	0.0002374
3	13459234	rs6769612	A	G	NUP210	0.526	0.551788	0.129906	2.2372e-05	0.532	0.0437389	0.198661	0.82578	0.5278	0.3996	0.1087	0.0002374
3	13460019	rs113945613	C	T	NUP210	0.474	-0.557133	0.12987	1.85301e-05	0.468	-0.0437389	0.198661	0.82578	0.4722	-0.4034	0.1087	0.0002063
3	13461430	rs6782979	C	T	NUP210	0.529	0.52421	0.12996	5.65173e-05	0.534	0.0206123	0.198661	0.917382	0.5305	0.3733	0.1088	0.0005985
3	13462683	rs9870242	C	T		0.534	0.525114	0.129685	5.29151e-05	0.537	0.0499382	0.199442	0.802332	0.5349	0.3839	0.1087	0.0004138
3	13485776	rs9881210	A	T		0.548	-0.525197	0.1305	5.8738e-05	0.549	-0.226241	0.203138	0.265636	0.5483	-0.4379	0.1098	6.664e-05
3	13492063	rs777812316	A	AAAAG		0.542	-0.517524	0.131047	8.05268e-05	0.547	-0.202752	0.203439	0.319164	0.5435	-0.4252	0.1102	0.0001135
3	13492287	rs11926813	A	G		0.541	-0.516029	0.131033	8.4284e-05	0.547	-0.202752	0.203439	0.319164	0.5428	-0.4242	0.1102	0.0001179
3	13498505	rs7635220	A	G		0.56	-0.535951	0.13165	4.82155e-05	0.561	-0.169802	0.204716	0.407028	0.5603	-0.4288	0.1107	0.0001076
3	13498834	rs773935397	T	TCATAAAAAG		0.56	-0.515583	0.131738	9.32376e-05	0.559	-0.147048	0.20465	0.47258	0.5597	-0.4076	0.1108	0.0002335
3	17277928	rs56110448	A	G	TBC1D5	0.945	-1.14336	0.281193	4.92326e-05	NA	NA	NA	NA	0.945	-1.1434	0.2812	4.78e-05
3	17853367	rs58494604	A	G	TBC1D5	0.046	1.22938	0.305002	5.72176e-05	NA	NA	NA	NA	0.046	1.2294	0.305	5.561e-05
3	17868000	rs10510480	C	T	TBC1D5	0.035	1.39651	0.348239	6.2385e-05	NA	NA	NA	NA	0.035	1.3965	0.3482	6.066e-05
3	17884043	rs73038214	A	C	TBC1D5	0.049	1.23234	0.29981	4.07286e-05	NA	NA	NA	NA	0.049	1.2323	0.2998	3.95e-05
3	21382735	rs73819910	C	T		0.022	-1.4498	0.429993	0.000758091	0.023	-1.87316	0.648794	0.00396274	0.0223	-1.579	0.3584	1.056e-05
3	21389529	rs73819911	C	T		0.022	-1.4498	0.429993	0.000758091	0.024	-1.85679	0.643376	0.00397684	0.0226	-1.5755	0.3575	1.049e-05
3	21410539	rs192540122	G	T		0.978	1.31654	0.433666	0.00242274	0.976	1.63459	0.643589	0.0112264	0.9774	1.4159	0.3596	8.255e-05
3	21410541	rs138728650	A	G		0.022	-1.31654	0.433666	0.00242274	0.024	-1.66938	0.637461	0.00894388	0.0226	-1.4282	0.3586	6.803e-05
3	21431744	rs56063158	C	T		0.027	-1.30015	0.389555	0.000857266	0.026	-1.34808	0.618473	0.0294888	0.0267	-1.3138	0.3296	6.728e-05
3	21432296	rs73819917	A	C		0.027	-1.30015	0.389555	0.000857266	0.026	-1.34808	0.618473	0.0294888	0.0267	-1.3138	0.3296	6.728e-05
3	21435869	rs527985674	G	T		0.973	1.30015	0.389555	0.000857266	0.974	1.29735	0.623467	0.0376741	0.9733	1.2994	0.3304	8.387e-05
3	21435872	rs539804207	A	AG		0.974	1.42996	0.397254	0.000324671	0.976	1.36278	0.650993	0.0365398	0.9745	1.4117	0.3391	3.139e-05
3	21435873		T	TAGA		0.974	1.42996	0.397254	0.000324671	0.976	1.36278	0.650993	0.0365398	0.9745	1.4117	0.3391	3.139e-05
3	21437694		A	G		0.027	-1.30015	0.389555	0.000857266	0.026	-1.375	0.61777	0.0262304	0.0267	-1.3214	0.3295	6.064e-05
3	21440829	rs73819921	A	G		0.027	-1.30015	0.389555	0.000857266	0.026	-1.28913	0.622751	0.0386766	0.0267	-1.2971	0.3303	8.589e-05
3	21443808	rs190980297	A	G		0.024	-1.41547	0.413994	0.000638149	0.025	-1.23356	0.63347	0.0517494	0.0243	-1.361	0.3466	8.589e-05
3	21444599	rs59204147	A	AAAT		0.973	1.30015	0.389555	0.000857266	0.974	1.28913	0.622751	0.0386766	0.9733	1.2971	0.3303	8.589e-05
3	21466972		A	C	ZNF385D	0.042	-1.43672	0.328042	1.2359e-05	NA	NA	NA	NA	0.042	-1.4367	0.328	1.189e-05
3	24209840	rs2596626	C	G	THRB	0.923	-0.993207	0.246214	5.64482e-05	0.907	-0.0225066	0.354244	0.949353	0.9178	-0.677	0.2022	0.000812
3	30169629	rs1911072	C	T		0.674	0.0102359	0.137826	0.940804	0.657	-0.893593	0.208279	1.93865e-05	0.6688	-0.265	0.1149	0.02113
3	30174833	rs1434002	A	G		0.347	0.00214048	0.135389	0.987387	0.359	0.940085	0.206992	6.18955e-06	0.3506	0.2832	0.1133	0.01245
3	32919070	rs72852836	C	T	TRIM71	0.967	-1.49977	0.360636	3.30545e-05	NA	NA	NA	NA	0.967	-1.4998	0.3606	3.201e-05
3	32919746	rs6765566	C	T	TRIM71	0.967	-1.49977	0.360636	3.30545e-05	NA	NA	NA	NA	0.967	-1.4998	0.3606	3.201e-05
3	32923331	rs72852844	G	T	TRIM71	0.966	-1.49754	0.359885	3.26976e-05	NA	NA	NA	NA	0.966	-1.4975	0.3599	3.166e-05
3	36718006	rs554808348	C	T		0.971	-1.47592	0.366056	5.69198e-05	NA	NA	NA	NA	0.971	-1.4759	0.3661	5.532e-05
3	37540192	rs267516	A	T	ITGA9	0.648	-0.444928	0.134155	0.000924086	0.636	-0.451319	0.207243	0.0296353	0.6445	-0.4468	0.1126	7.263e-05
3	40803044	rs112481925	A	C		0.184	-0.0483555	0.167874	0.773334	0.163	-1.09128	0.274985	7.69559e-05	0.1783	-0.3315	0.1433	0.02069
3	41824432	rs17081304	C	T	ULK4	0.262	-0.0478671	0.152239	0.753226	0.27	-0.908887	0.22899	7.67585e-05	0.2645	-0.3118	0.1268	0.01392
3	41984041	rs1717022	A	G	ULK4	0.108	0.843577	0.210767	6.44635e-05	NA	NA	NA	NA	0.108	0.8436	0.2108	6.27e-05
3	43082687	rs537753518	A	G	KRBOX1	0.037	-1.31266	0.344025	0.000139039	0.03	-0.883536	0.588023	0.133238	0.0352	-1.2032	0.2969	5.075e-05
3	43086334	rs76865623	A	C	KRBOX1	0.963	1.39731	0.34413	5.04406e-05	0.969	0.93347	0.583729	0.110071	0.9645	1.2777	0.2964	1.633e-05
3	43089469	rs80202300	A	T	KRBOX1	0.963	1.37671	0.345048	6.79406e-05	0.969	0.93347	0.583729	0.110071	0.9646	1.2619	0.297	2.153e-05
3	43092261	rs147919533	A	G	KRBOX1	0.037	-1.37671	0.345048	6.79406e-05	0.031	-0.93347	0.583729	0.110071	0.0354	-1.2619	0.297	2.153e-05
3	43195283	rs75635021	A	T		0.96	1.1162	0.32771	0.000669176	0.967	1.26745	0.561019	0.0240639	0.9618	1.1547	0.283	4.493e-05
3	43208650	rs114369676	C	T		0.975	1.45335	0.413703	0.000450648	0.98	1.35772	0.719985	0.059588	0.9762	1.4296	0.3587	6.734e-05
3	43219239	rs139709490	A	G		0.049	-1.01624	0.301019	0.00074638	0.048	-1.00667	0.465779	0.0308872	0.0487	-1.0134	0.2528	6.11e-05
3	43231506	rs139663004	A	AC		0.197	0.586338	0.166297	0.000429483	0.176	0.547447	0.268609	0.0417777	0.1912	0.5756	0.1414	4.688e-05
3	43296122	rs75682341	A	G		0.032	-1.15686	0.369133	0.00174382	0.02	-2.02111	0.703127	0.00412404	0.0294	-1.3436	0.3268	3.94e-05
3	43327714	rs145900249	G	GC		0.974	1.34376	0.413548	0.00117157	0.984	1.72687	0.783668	0.0277584	0.9762	1.4272	0.3657	9.533e-05
3	43377989	rs115649530	A	G	SNRK	0.974	1.32942	0.407446	0.00111751	0.983	1.7657	0.762958	0.0208337	0.976	1.4262	0.3594	7.239e-05
3	43452646	rs75982802	C	T	SNRK	0.026	-1.35535	0.408868	0.000929522	0.018	-1.92165	0.753529	0.0108992	0.0242	-1.4842	0.3594	3.63e-05
3	43453831	rs76947522	C	T	SNRK	0.974	1.35535	0.408868	0.000929522	0.982	1.92165	0.753529	0.0108992	0.9758	1.4842	0.3594	3.63e-05
3	43576633	rs138306541	G	T	ANO10	0.026	-1.31626	0.410098	0.0013454	0.018	-1.88471	0.753572	0.012526	0.0242	-1.4461	0.3602	5.952e-05
3	44273131	rs4377471	C	T		0.507	-0.166175	0.129973	0.201178	0.523	0.84651	0.193767	1.36644e-05	0.512	0.1481	0.1079	0.1701
3	44561068	rs11921660	C	T		0.946	0.749202	0.284766	0.00856552	0.939	1.30035	0.408203	0.00148497	0.9437	0.9296	0.2336	6.881e-05
3	44586420	rs138269051	A	G		0.919	0.677957	0.23569	0.0040543	0.912	0.953448	0.351976	0.00685527	0.9168	0.7632	0.1958	9.727e-05
3	45583297		C	T	LARS2	NA	NA	NA	NA	0.89	-1.29804	0.319162	5.09649e-05	0.89	-1.298	0.3192	4.761e-05
3	50542207	rs72938738	A	G		0.091	0.899781	0.227086	7.62457e-05	0.098	0.00609656	0.344923	0.985901	0.0931	0.6295	0.1897	0.0009029
3	50542545	rs72938740	A	G		0.091	0.899781	0.227086	7.62457e-05	0.098	0.00609656	0.344923	0.985901	0.0931	0.6295	0.1897	0.0009029
3	50544172	rs112514555	C	T		0.913	-0.915247	0.230059	7.13131e-05	0.905	0.00248188	0.347988	0.994311	0.9106	-0.6361	0.1919	0.0009174
3	50547418	rs58124375	A	G		0.086	0.925987	0.231446	6.48855e-05	0.095	-0.00248188	0.347988	0.994311	0.0888	0.6412	0.1927	0.0008767
3	50555674	rs72938750	A	G		0.089	0.941653	0.228307	3.83287e-05	0.096	-0.00789147	0.34693	0.981857	0.0911	0.6547	0.1907	0.0005972
3	50565136	rs76119642	A	G		0.089	0.941653	0.228307	3.83287e-05	0.095	-0.0434821	0.347623	0.900479	0.0908	0.6448	0.1908	0.000728
3	50567832	rs113955450	A	G		0.089	0.956281	0.228434	2.93102e-05	0.095	-0.0434821	0.347623	0.900479	0.0908	0.6548	0.1909	0.0006041
3	50571640	rs61638172	A	G		0.086	0.917822	0.231333	7.45974e-05	0.094	-0.0615905	0.349709	0.860232	0.0884	0.6197	0.1929	0.001319
3	50571879	rs796438318	C	CATG		0.087	0.931204	0.230633	5.55731e-05	0.095	-0.0389434	0.348194	0.910967	0.0894	0.6354	0.1923	0.0009518
3	50581106	rs59896933	A	G		0.087	0.931204	0.230633	5.55731e-05	0.094	-0.00421222	0.348767	0.990366	0.0891	0.6466	0.1924	0.0007761
3	55425999	rs578140230	C	CA		0.795	-0.0573811	0.16114	0.721798	0.764	-0.981573	0.238574	4.16886e-05	0.7853	-0.3469	0.1335	0.009378
3	55441527	rs3846037	C	T		0.854	-0.0221922	0.182175	0.903053	0.812	-1.03244	0.258277	6.82575e-05	0.84	-0.3578	0.1489	0.01623
3	55772373	rs7612735	A	G	ERC2	0.902	-0.0590389	0.219419	0.787898	0.891	-1.2638	0.320941	8.73382e-05	0.8985	-0.4428	0.1811	0.0145
3	56547960	rs150099289	A	G		0.044	-0.0104534	0.318059	0.973784	0.032	-2.1688	0.545128	7.38257e-05	0.041	-0.5586	0.2747	0.04202
3	58194051	rs3732631	A	C	DNASE1L3	0.184	-0.691199	0.167496	3.79712e-05	0.193	-0.153289	0.250802	0.541194	0.1868	-0.5253	0.1393	0.0001625
3	58194689	rs4681820	A	G	DNASE1L3	0.183	-0.693668	0.167374	3.51659e-05	0.191	-0.108942	0.25135	0.664789	0.1855	-0.514	0.1393	0.0002244
3	58194709	rs4681666	A	G	DNASE1L3	0.185	-0.703385	0.16674	2.5445e-05	0.191	-0.102705	0.25128	0.68282	0.1868	-0.5198	0.1389	0.0001833
3	58195231	rs3772990	A	C	DNASE1L3	0.817	0.706128	0.167559	2.59262e-05	0.809	0.124671	0.251229	0.61982	0.8145	0.5271	0.1394	0.000156
3	58195466	rs17059007	A	G	DNASE1L3	0.183	-0.720652	0.167567	1.76601e-05	0.191	-0.108942	0.25135	0.664789	0.1855	-0.5324	0.1394	0.0001341
3	58195711	rs4681668	A	G	DNASE1L3	0.193	-0.641231	0.163827	9.30999e-05	0.2	-0.123203	0.248576	0.62025	0.1951	-0.4844	0.1368	0.0003988
3	58196639	rs2292677	C	T	DNASE1L3	0.808	0.687783	0.164555	3.01651e-05	0.803	0.0838307	0.249584	0.737023	0.8065	0.5048	0.1374	0.0002384
3	58198715	rs13098114	C	T	DNASE1L3	0.172	-0.729352	0.171662	2.22581e-05	0.183	-0.0574021	0.256122	0.822705	0.1754	-0.5211	0.1426	0.0002581
3	58199211	rs12494394	C	T	DNASE1L3	0.828	0.725616	0.171607	2.43582e-05	0.817	0.0574021	0.256122	0.822705	0.8246	0.5186	0.1426	0.0002753
3	58199348	rs4681822	C	G	DNASE1L3	0.827	0.733846	0.171442	1.93323e-05	0.816	0.043071	0.255253	0.866033	0.8236	0.5191	0.1423	0.0002649
3	58199524	rs13099544	G	T	DNASE1L3	0.172	-0.725616	0.171607	2.43582e-05	0.183	-0.0574021	0.256122	0.822705	0.1754	-0.5186	0.1426	0.0002753
3	58199532	rs13077144	G	T	DNASE1L3	0.826	0.719683	0.170974	2.64912e-05	0.815	0.0641443	0.254984	0.801426	0.8226	0.5164	0.142	0.0002767
3	58199535		T	TTA	DNASE1L3	0.831	0.708306	0.173129	4.42292e-05	0.821	-0.0355434	0.257717	0.890331	0.8279	0.477	0.1437	0.000903
3	58199630	rs4681823	A	T	DNASE1L3	0.828	0.725616	0.171607	2.43582e-05	0.817	0.0574021	0.256122	0.822705	0.8246	0.5186	0.1426	0.0002753
3	58199669	rs4681824	G	T	DNASE1L3	0.193	-0.652975	0.16394	6.99251e-05	0.199	0.0179978	0.247697	0.942089	0.1948	-0.4486	0.1367	0.001033
3	58209571	rs1515460	A	G		0.234	-0.621403	0.153704	5.43519e-05	0.234	0.0276361	0.228818	0.903889	0.234	-0.4196	0.1276	0.001007
3	58544000	rs71625631	C	CTTT		0.359	0.534815	0.134614	7.29318e-05	NA	NA	NA	NA	0.359	0.5348	0.1346	7.099e-05
3	61851788	rs651565	C	T	PTPRG	0.246	-0.524291	0.148427	0.000419171	0.25	-0.485767	0.231908	0.0364268	0.2472	-0.5131	0.125	4.056e-05
3	61869506	rs79567518	C	T	PTPRG	0.8	0.555952	0.159265	0.000489767	0.794	0.501894	0.250743	0.0455667	0.7983	0.5404	0.1344	5.825e-05
3	68381241	rs188284010	C	T	FAM19A1	0.968	-0.388604	0.368977	0.292351	0.968	2.25161	0.57091	8.51766e-05	0.968	0.3893	0.3099	0.209
3	68382243	rs116009035	A	T	FAM19A1	0.968	-0.349747	0.369944	0.344541	0.968	2.25161	0.57091	8.51766e-05	0.968	0.4195	0.3105	0.1766
3	68448693		A	C	FAM19A1	0.933	-0.426827	0.256908	0.0967548	0.942	1.68437	0.419416	6.31613e-05	0.9355	0.1492	0.2191	0.4959
3	70259087	rs12714760	C	T		0.971	-0.0863292	0.392223	0.825809	0.97	2.50054	0.583283	1.96769e-05	0.9707	0.7192	0.3255	0.02714
3	71492318	rs55705945	C	T	FOXP1	0.525	-0.0844911	0.132033	0.522279	0.518	-0.828405	0.199282	3.47245e-05	0.5229	-0.3114	0.1101	0.004663
3	71492922		C	T	FOXP1	0.522	-0.0385067	0.131886	0.770333	0.515	-0.835193	0.19895	2.90745e-05	0.5199	-0.2817	0.1099	0.01038
3	73834909	rs112949609	C	G		0.981	0.90797	0.47462	0.0558526	0.984	3.11958	0.791624	8.62904e-05	0.9818	1.4928	0.4071	0.0002453
3	73855177	rs56207916	C	T		0.96	0.867226	0.322328	0.00718025	0.963	1.6804	0.512915	0.00108461	0.9608	1.0974	0.2729	5.789e-05
3	73885658	rs111529310	A	C		0.979	1.11237	0.438224	0.0111956	0.982	3.27238	0.761743	1.89155e-05	0.9797	1.6495	0.3799	1.409e-05
3	73892490	rs141121639	A	C		0.022	-0.991512	0.431378	0.0216142	0.019	-2.99384	0.736223	5.10857e-05	0.0212	-1.5033	0.3722	5.37e-05
3	74681017	rs60275811	G	T		0.199	-0.176012	0.158644	0.267329	0.212	-1.04851	0.243031	1.74311e-05	0.2029	-0.4367	0.1328	0.001011
3	74681077	rs35391731	A	T		0.199	-0.176012	0.158644	0.267329	0.212	-1.04851	0.243031	1.74311e-05	0.2029	-0.4367	0.1328	0.001011
3	74691449	rs11715446	A	G		0.195	-0.159629	0.159706	0.317638	0.21	-1.05785	0.242572	1.41482e-05	0.1995	-0.4312	0.1334	0.001225
3	74691769	rs9856528	A	G		0.18	-0.15709	0.164504	0.339703	0.19	-1.05207	0.253954	3.69105e-05	0.183	-0.4216	0.1381	0.00226
3	74698652	rs61521547	G	GTGTC		0.178	-0.0962813	0.16685	0.563954	0.185	-1.14299	0.258146	1.04616e-05	0.1801	-0.4047	0.1401	0.003876
3	74698679	rs9852306	G	T		0.164	-0.0917878	0.171658	0.592895	0.178	-1.11125	0.263552	2.68309e-05	0.1682	-0.3954	0.1438	0.005973
3	74700977	rs1447823	C	T		0.267	-0.0846769	0.14343	0.554995	0.275	-0.89889	0.225525	7.16409e-05	0.2693	-0.3192	0.121	0.008362
3	75944671	rs185371927	C	G		0.017	-1.91088	0.489724	9.78594e-05	NA	NA	NA	NA	0.017	-1.9109	0.4897	9.542e-05
3	75957476	rs201055566	G	GTTCT	ROBO2	0.019	-1.90603	0.463517	4.04318e-05	NA	NA	NA	NA	0.019	-1.906	0.4635	3.921e-05
3	77274092	rs9828698	C	T	ROBO2	0.031	1.18214	0.371603	0.00148411	0.03	1.4758	0.569204	0.00964597	0.0307	1.2699	0.3112	4.482e-05
3	79857471	rs1502306	C	G		0.976	-0.751538	0.418765	0.0728262	0.975	2.4746	0.633598	9.9632e-05	0.9757	0.2293	0.3494	0.5116
3	84139974	rs114712833	C	T		0.986	-0.311082	0.539624	0.564341	0.982	-2.98495	0.73341	5.03402e-05	0.9846	-1.2502	0.4346	0.004023
3	84185140	rs76345589	C	G		0.985	-0.261814	0.522675	0.616476	0.98	-3.10637	0.70013	1.00338e-05	0.9832	-1.2798	0.4188	0.002246
3	85182707	rs538021190	C	CCACTGGTGTATTTACA	CADM2	0.097	0.72816	0.219068	0.000900081	0.088	0.808373	0.357689	0.0240146	0.0945	0.75	0.1868	5.948e-05
3	86762237	rs75481562	C	T		0.028	1.45783	0.391417	0.000199897	0.029	1.41763	0.5847	0.015486	0.0283	1.4454	0.3253	8.84e-06
3	95679600	rs9850700	A	C		0.446	-0.211938	0.135809	0.11875	0.428	0.818374	0.2043	6.59218e-05	0.4405	0.1038	0.1131	0.3586
3	95681000	rs12639574	C	T		0.446	-0.212659	0.135611	0.116967	0.428	0.818374	0.2043	6.59218e-05	0.4405	0.1027	0.113	0.3635
3	95681113	rs9860553	A	C		0.445	-0.212168	0.135717	0.118102	0.428	0.836139	0.204427	4.62087e-05	0.4398	0.1085	0.1131	0.3371
3	95682080	rs4553988	G	T		0.554	0.214009	0.135924	0.1155	0.572	-0.836139	0.204427	4.62087e-05	0.5595	-0.1079	0.1132	0.3403
3	95682097	rs4264745	C	T		0.554	0.214009	0.135924	0.1155	0.572	-0.836139	0.204427	4.62087e-05	0.5595	-0.1079	0.1132	0.3403
3	95683253	rs398062589	C	CTG		0.446	-0.204529	0.135972	0.132654	0.429	0.827231	0.203994	5.35831e-05	0.4408	0.1129	0.1131	0.3185
3	99224011	rs73144669	A	G		0.916	0.976918	0.230754	2.38022e-05	0.917	0.273705	0.359381	0.446461	0.9163	0.7716	0.1942	7.069e-05
3	99241548	rs77768854	C	T		0.931	1.04151	0.254268	4.33081e-05	0.933	0.241906	0.395346	0.540739	0.9316	0.8075	0.2139	0.0001593
3	99246396	rs12488298	A	G		0.932	1.03746	0.25376	4.47749e-05	0.933	0.245038	0.395435	0.535603	0.9323	0.8063	0.2136	0.0001597
3	99247368	rs73134343	A	G		0.932	1.03746	0.25376	4.47749e-05	0.933	0.245038	0.395435	0.535603	0.9323	0.8063	0.2136	0.0001597
3	99248498	rs2063638	C	T		0.932	1.03746	0.25376	4.47749e-05	0.933	0.252595	0.396681	0.524405	0.9323	0.8095	0.2138	0.0001524
3	99252074	rs17775207	A	C		0.932	1.03746	0.25376	4.47749e-05	0.934	0.25854	0.398789	0.516916	0.9326	0.813	0.2141	0.0001463
3	99253445	rs1513297	A	G		0.932	1.03746	0.25376	4.47749e-05	0.934	0.286757	0.396177	0.469334	0.9326	0.8191	0.2137	0.0001266
3	99254625	rs10935836	A	G		0.932	1.03746	0.25376	4.47749e-05	0.934	0.286757	0.396177	0.469334	0.9326	0.8191	0.2137	0.0001266
3	99255124	rs17775314	A	G		0.932	1.03746	0.25376	4.47749e-05	0.934	0.275023	0.397297	0.488933	0.9326	0.8165	0.2139	0.0001345
3	99255318	rs12488332	C	T		0.932	1.03746	0.25376	4.47749e-05	0.934	0.275023	0.397297	0.488933	0.9326	0.8165	0.2139	0.0001345
3	99268026	rs368950397	T	TAAC		0.067	-1.00713	0.256559	8.88096e-05	0.066	-0.258028	0.395298	0.514056	0.0667	-0.7851	0.2152	0.0002641
3	99268430		A	G		0.067	-1.00713	0.256559	8.88096e-05	0.066	-0.258028	0.395298	0.514056	0.0667	-0.7851	0.2152	0.0002641
3	113857277	rs1961462	A	G	DRD3	0.871	0.587496	0.190838	0.00210228	0.875	0.728823	0.302032	0.0159795	0.8721	0.6278	0.1613	9.963e-05
3	126316456	rs1520845	C	T	TXNRD3	0.489	-0.510989	0.130112	8.81574e-05	0.489	0.0613965	0.197608	0.756088	0.489	-0.3379	0.1087	0.001876
3	126317149	rs2201006	C	G	TXNRD3	0.489	-0.510989	0.130112	8.81574e-05	0.489	0.0613965	0.197608	0.756088	0.489	-0.3379	0.1087	0.001876
3	126319413	rs869287110	C	CTT	TXNRD3	0.489	-0.50777	0.129789	9.37948e-05	0.491	0.0601921	0.197168	0.760208	0.4896	-0.3361	0.1084	0.001935
3	126320176	rs1112614	G	T	TXNRD3	0.489	-0.510989	0.130112	8.81574e-05	0.489	0.0613965	0.197608	0.756088	0.489	-0.3379	0.1087	0.001876
3	126328101	rs9856833	A	G	TXNRD3	0.511	0.510989	0.130112	8.81574e-05	0.511	-0.0613965	0.197608	0.756088	0.511	0.3379	0.1087	0.001876
3	126328745	rs9857786	A	G	TXNRD3	0.511	0.510989	0.130112	8.81574e-05	0.511	-0.0613965	0.197608	0.756088	0.511	0.3379	0.1087	0.001876
3	126329277	rs1520846	A	G	TXNRD3	0.511	0.510989	0.130112	8.81574e-05	0.511	-0.0613965	0.197608	0.756088	0.511	0.3379	0.1087	0.001876
3	126333757	rs4679273	C	T	TXNRD3	0.489	-0.516124	0.130155	7.52471e-05	0.489	0.0613965	0.197608	0.756088	0.489	-0.3414	0.1087	0.001685
3	126333991		A	G	TXNRD3	0.511	0.516124	0.130155	7.52471e-05	0.511	-0.0613965	0.197608	0.756088	0.511	0.3414	0.1087	0.001685
3	126334760	rs10934787	A	C	TXNRD3	0.511	0.516124	0.130155	7.52471e-05	0.511	-0.0613965	0.197608	0.756088	0.511	0.3414	0.1087	0.001685
3	127019110	rs2358567	A	G		0.159	-0.697978	0.176974	8.22804e-05	0.152	0.034482	0.277359	0.901082	0.157	-0.4861	0.1492	0.001122
3	127027256	rs67201865	A	T		0.839	0.696085	0.175943	7.81638e-05	0.846	-0.0970964	0.27724	0.726236	0.841	0.4684	0.1486	0.001617
3	127028285	rs143919510	A	T		0.838	0.69494	0.17584	7.95439e-05	0.844	-0.127648	0.276377	0.64427	0.8397	0.4579	0.1484	0.002025
3	127028329		C	T		0.161	-0.696085	0.175943	7.81638e-05	0.156	0.127648	0.276377	0.64427	0.1596	-0.4585	0.1484	0.002006
3	127028582	rs73208746	G	T		0.161	-0.691544	0.175965	8.71698e-05	0.156	0.115031	0.276809	0.677812	0.1596	-0.4594	0.1485	0.001977
3	127028901	rs11914723	A	G		0.839	0.696085	0.175943	7.81638e-05	0.843	-0.112865	0.276151	0.682832	0.8402	0.4625	0.1484	0.001827
3	127028929	rs11922489	C	T		0.839	0.696085	0.175943	7.81638e-05	0.843	-0.112865	0.276151	0.682832	0.8402	0.4625	0.1484	0.001827
3	127029072	rs2358574	A	G		0.161	-0.696085	0.175943	7.81638e-05	0.157	0.112865	0.276151	0.682832	0.1598	-0.4625	0.1484	0.001827
3	127029080	rs4026935	C	G		0.839	0.696085	0.175943	7.81638e-05	0.843	-0.112865	0.276151	0.682832	0.8402	0.4625	0.1484	0.001827
3	127029318	rs4026934	A	G		0.841	0.69332	0.176811	9.03835e-05	0.844	-0.100223	0.27658	0.717148	0.8419	0.4631	0.149	0.001879
3	127029465	rs4026933	A	C		0.161	-0.696085	0.175943	7.81638e-05	0.157	0.112865	0.276151	0.682832	0.1598	-0.4625	0.1484	0.001827
3	127029559	rs4026932	A	G		0.161	-0.696085	0.175943	7.81638e-05	0.157	0.112865	0.276151	0.682832	0.1598	-0.4625	0.1484	0.001827
3	127029681	rs56070970	A	G		0.161	-0.696085	0.175943	7.81638e-05	0.157	0.112865	0.276151	0.682832	0.1598	-0.4625	0.1484	0.001827
3	127029791	rs4408835	C	T		0.841	0.69332	0.176811	9.03835e-05	0.844	-0.100223	0.27658	0.717148	0.8419	0.4631	0.149	0.001879
3	127030745	rs4485673	A	G		0.161	-0.696085	0.175943	7.81638e-05	0.157	0.0983498	0.275961	0.721616	0.1598	-0.4665	0.1484	0.001664
3	128597567	rs73862571	C	T		0.014	2.20037	0.542677	5.16948e-05	0.011	-1.41396	0.969321	0.144926	0.0133	1.3379	0.4735	0.004723
3	128608357	rs57542754	A	G	ACAD9	0.986	-2.20037	0.542677	5.16948e-05	0.989	1.41396	0.969321	0.144926	0.9867	-1.3379	0.4735	0.004723
3	128608948	rs142163257	T	TA	ACAD9	0.014	2.20037	0.542677	5.16948e-05	0.011	-1.41396	0.969321	0.144926	0.0133	1.3379	0.4735	0.004723
3	128670167	rs56217553	A	G	KIAA1257	0.014	2.09701	0.535186	9.15009e-05	0.011	-1.41396	0.969321	0.144926	0.0133	1.2768	0.4685	0.006428
3	128679719	rs183951009	C	T	KIAA1257	0.014	2.09701	0.535186	9.15009e-05	0.011	-1.41396	0.969321	0.144926	0.0133	1.2768	0.4685	0.006428
3	128681939	rs375640304	G	T	KIAA1257	0.015	2.0879	0.528038	7.89008e-05	NA	NA	NA	NA	0.015	2.0879	0.528	7.684e-05
3	128686584	rs75972972	C	T	KIAA1257	0.986	-2.09701	0.535186	9.15009e-05	0.989	1.41396	0.969321	0.144926	0.9867	-1.2768	0.4685	0.006428
3	128695033	rs73865522	A	C	KIAA1257	0.986	-2.09701	0.535186	9.15009e-05	0.989	1.41396	0.969321	0.144926	0.9867	-1.2768	0.4685	0.006428
3	128705239	rs77286061	C	T	KIAA1257	0.014	2.09701	0.535186	9.15009e-05	0.01	-1.47188	0.989386	0.13712	0.0131	1.2891	0.4707	0.006171
3	128711018		A	G	KIAA1257	0.014	2.09701	0.535186	9.15009e-05	0.01	-1.47188	0.989386	0.13712	0.0131	1.2891	0.4707	0.006171
3	128723995	rs376931734	G	GGACA	EFCC1	0.014	2.31487	0.543165	2.10052e-05	NA	NA	NA	NA	0.014	2.3149	0.5432	2.028e-05
3	128724826	rs73865536	G	T	EFCC1	0.014	2.31487	0.543165	2.10052e-05	NA	NA	NA	NA	0.014	2.3149	0.5432	2.028e-05
3	128730416	rs55743728	A	G	EFCC1	0.987	-2.37629	0.553618	1.83366e-05	NA	NA	NA	NA	0.987	-2.3763	0.5536	1.768e-05
3	128731437	rs73865538	C	T	EFCC1	0.987	-2.37629	0.553618	1.83366e-05	NA	NA	NA	NA	0.987	-2.3763	0.5536	1.768e-05
3	129121081	rs6789863	A	G	EFCAB12	0.044	1.24941	0.317356	8.47053e-05	0.037	-0.667777	0.508608	0.18947	0.042	0.7122	0.2692	0.008168
3	129132424	rs12636927	A	G	EFCAB12	0.897	-0.845186	0.21189	6.82573e-05	0.891	-0.120485	0.312979	0.700339	0.8951	-0.6174	0.1755	0.0004334
3	129142354	rs9852506	A	G	EFCAB12	0.112	0.800265	0.203649	8.73135e-05	0.115	0.125	0.303816	0.680834	0.1129	0.5909	0.1692	0.0004772
3	129142476	rs9872390	A	T	EFCAB12	0.112	0.800265	0.203649	8.73135e-05	0.115	0.125	0.303816	0.680834	0.1129	0.5909	0.1692	0.0004772
3	129142477	rs9872391	A	T	EFCAB12	0.112	0.800265	0.203649	8.73135e-05	0.115	0.125	0.303816	0.680834	0.1129	0.5909	0.1692	0.0004772
3	137003783	rs11916892	A	G		0.879	-0.822508	0.200752	4.3118e-05	NA	NA	NA	NA	0.879	-0.8225	0.2008	4.183e-05
3	138201821	rs12636936	A	G		0.077	0.99885	0.243563	4.24095e-05	NA	NA	NA	NA	0.077	0.9989	0.2436	4.114e-05
3	138353187	rs75632551	A	G		0.042	-1.27329	0.320477	7.2886e-05	0.04	-0.345602	0.510836	0.498837	0.0414	-1.0113	0.2715	0.0001952
3	138404327	rs143090130	G	T	PIK3CB	0.038	-1.36878	0.334805	4.47844e-05	0.038	-0.595116	0.528962	0.260805	0.038	-1.1475	0.2829	4.988e-05
3	138425521	rs150223205	C	T	PIK3CB	0.962	1.3404	0.337175	7.21975e-05	0.962	0.595116	0.528962	0.260805	0.962	1.1251	0.2843	7.59e-05
3	138428066	rs146436453	C	T	PIK3CB	0.038	-1.36878	0.334805	4.47844e-05	0.038	-0.595116	0.528962	0.260805	0.038	-1.1475	0.2829	4.988e-05
3	138461961	rs150938387	C	T	PIK3CB	0.962	1.3404	0.337175	7.21975e-05	0.962	0.698636	0.531649	0.189085	0.962	1.1563	0.2847	4.887e-05
3	138468768	rs138978658	C	T	PIK3CB	0.038	-1.3404	0.337175	7.21975e-05	0.038	-0.698636	0.531649	0.189085	0.038	-1.1563	0.2847	4.887e-05
3	138470762	rs147423433	A	G	PIK3CB	0.962	1.36878	0.334805	4.47844e-05	0.962	0.698636	0.531649	0.189085	0.962	1.1785	0.2833	3.186e-05
3	138477845	rs368398458	C	CCAAA	PIK3CB	0.038	-1.3002	0.336361	0.000113593	0.038	-0.698636	0.531649	0.189085	0.038	-1.1282	0.2842	7.211e-05
3	138494709	rs377752674	T	TTTCAAATATAACA	PIK3CB	0.962	1.3404	0.337175	7.21975e-05	0.962	0.698636	0.531649	0.189085	0.962	1.1563	0.2847	4.887e-05
3	138506041	rs77937342	A	G	PIK3CB	0.963	1.37858	0.338813	4.86619e-05	0.964	0.850799	0.540163	0.115522	0.9633	1.2296	0.287	1.837e-05
3	138507788	rs200910587	A	AAG	PIK3CB	0.038	-1.3404	0.337175	7.21975e-05	0.036	-0.850799	0.540163	0.115522	0.0374	-1.2031	0.286	2.595e-05
3	138510968	rs139115057	C	T	PIK3CB	0.038	-1.3404	0.337175	7.21975e-05	0.036	-0.817528	0.543174	0.132584	0.0374	-1.195	0.2865	3.028e-05
3	138511754	rs139796788	A	G	PIK3CB	0.962	1.3404	0.337175	7.21975e-05	0.964	0.817528	0.543174	0.132584	0.9626	1.195	0.2865	3.028e-05
3	138521926	rs149499335	G	T	PIK3CB	0.963	1.37231	0.337894	5.02402e-05	0.964	0.817528	0.543174	0.132584	0.9633	1.2175	0.2869	2.2e-05
3	138525413	rs80193867	C	T	PIK3CB	0.037	-1.37231	0.337894	5.02402e-05	0.035	-0.788384	0.546348	0.1493	0.0364	-1.2108	0.2874	2.518e-05
3	138559196	rs140496936	A	C		0.96	1.28648	0.327015	8.57484e-05	NA	NA	NA	NA	0.96	1.2865	0.327	8.355e-05
3	138559711	rs148017940	A	T		0.04	-1.28648	0.327015	8.57484e-05	NA	NA	NA	NA	0.04	-1.2865	0.327	8.355e-05
3	138561737	rs80288486	G	T		0.96	1.28648	0.327015	8.57484e-05	NA	NA	NA	NA	0.96	1.2865	0.327	8.355e-05
3	141212459	rs60789293	C	CAGT	RASA2	0.141	-0.717035	0.183057	9.19776e-05	NA	NA	NA	NA	0.141	-0.717	0.1831	8.965e-05
3	143364875	rs529715582	C	T	SLC9A9	0.012	2.21729	0.594306	0.000194914	0.012	1.38907	0.909616	0.127021	0.012	1.9695	0.4975	7.539e-05
3	143368843	rs6771200	C	T	SLC9A9	0.012	2.2018	0.59927	0.000243509	0.012	1.38907	0.909616	0.127021	0.012	1.9558	0.5004	9.296e-05
3	145338647	rs10470329	A	G		0.944	1.11408	0.278749	6.60297e-05	0.939	-0.333889	0.406557	0.411674	0.9424	0.6511	0.2299	0.004627
3	145683040	rs489563	G	T		0.169	0.57269	0.17894	0.00138869	0.177	0.766636	0.259029	0.00314506	0.1716	0.6353	0.1472	1.593e-05
3	145683128	rs629017	G	T		0.831	-0.57269	0.17894	0.00138869	0.823	-0.766636	0.259029	0.00314506	0.8284	-0.6353	0.1472	1.593e-05
3	145683422	rs9850746	C	T		0.83	-0.540885	0.179082	0.00254985	0.822	-0.70498	0.258267	0.00643994	0.8274	-0.5942	0.1472	5.404e-05
3	145684536	rs6781994	G	T		0.831	-0.565814	0.179302	0.00161988	0.823	-0.711488	0.258366	0.00598674	0.8284	-0.6132	0.1473	3.147e-05
3	145685644	rs12695803	C	T		0.83	-0.55802	0.178484	0.00178904	0.823	-0.691965	0.259162	0.00769531	0.8277	-0.6011	0.147	4.327e-05
3	145687569	rs397876028	A	AT		0.8	-0.497399	0.167975	0.00309285	0.792	-0.625564	0.243266	0.0102541	0.7974	-0.5388	0.1382	9.705e-05
3	145689070	rs1398781	A	G		0.169	0.552583	0.179386	0.0020889	0.178	0.670176	0.258041	0.00952335	0.1719	0.5909	0.1473	6.027e-05
3	145689416	rs397728019	C	CA		0.829	-0.52324	0.177637	0.00325249	0.819	-0.698614	0.255565	0.00636362	0.8257	-0.5804	0.1459	6.924e-05
3	145695354	rs1039472	G	T		0.831	-0.550951	0.179534	0.00217164	0.822	-0.664799	0.257944	0.0100851	0.8281	-0.5881	0.1474	6.577e-05
3	145695407	rs397758869	T	TCTC		0.169	0.550951	0.179534	0.00217164	0.179	0.668049	0.256638	0.00936167	0.1723	0.5894	0.1471	6.157e-05
3	145720124	rs13063388	C	T		0.174	0.521001	0.177275	0.00332253	0.175	0.680298	0.260704	0.0091899	0.1743	0.5714	0.1466	9.714e-05
3	145722272	rs9289711	A	G		0.826	-0.521001	0.177275	0.00332253	0.825	-0.680298	0.260704	0.0091899	0.8257	-0.5714	0.1466	9.714e-05
3	146045154	rs116709647	A	G		0.065	0.861217	0.25742	0.000832887	0.066	1.01112	0.395957	0.0107934	0.0653	0.9058	0.2158	2.707e-05
3	146070049	rs74518508	A	G		0.051	1.01123	0.295273	0.00062498	0.043	1.12568	0.475565	0.0181012	0.0488	1.0431	0.2509	3.209e-05
3	146076717	rs149816600	C	T		0.948	-1.06169	0.291414	0.000274548	0.957	-1.1244	0.47549	0.0182149	0.9505	-1.0788	0.2485	1.412e-05
3	146081579	rs60908102	C	T		0.052	0.992911	0.29045	0.000639368	0.043	1.15477	0.475641	0.0153476	0.0496	1.0369	0.2479	2.879e-05
3	146084566	rs6764979	A	G		0.051	0.977816	0.294411	0.000908575	0.043	1.15477	0.475641	0.0153476	0.0488	1.0268	0.2503	4.099e-05
3	146085360	rs149744456	C	T		0.949	-0.977816	0.294411	0.000908575	0.957	-1.15477	0.475641	0.0153476	0.9512	-1.0268	0.2503	4.099e-05
3	146093243	rs116838674	C	T		0.041	0.950856	0.326204	0.00358854	0.038	1.3667	0.509953	0.00746965	0.0401	1.0716	0.2748	9.632e-05
3	146252435	rs532381780	C	CA	PLSCR1	0.98	1.85675	0.45341	4.34995e-05	0.981	0.142734	0.723085	0.843553	0.9803	1.373	0.3841	0.0003512
3	148629055	rs35450058	A	T		0.672	-0.538979	0.136636	8.20523e-05	0.669	-0.266979	0.205589	0.194347	0.6711	-0.4556	0.1138	6.227e-05
3	149816725	rs116532525	G	T		0.041	-1.29331	0.325632	7.33137e-05	NA	NA	NA	NA	0.041	-1.2933	0.3256	7.136e-05
3	149819744	rs16862467	A	G		0.041	-1.29697	0.325587	6.97911e-05	NA	NA	NA	NA	0.041	-1.297	0.3256	6.791e-05
3	149820856	rs114005806	A	G		0.039	-1.38139	0.333487	3.54933e-05	0.036	0.0641369	0.549714	0.90714	0.0382	-0.9925	0.2851	0.0004995
3	155727479	rs3075196	T	TAACAC		0.546	-0.419863	0.131925	0.00147693	0.566	-0.489094	0.203559	0.0164367	0.5519	-0.4403	0.1107	6.964e-05
3	169934975		A	AT		0.942	-1.08153	0.276769	9.55682e-05	0.945	0.141307	0.442879	0.749738	0.9428	-0.7381	0.2347	0.001662
3	169944978	rs60166737	C	G	PRKCI	0.094	0.953504	0.220023	1.52266e-05	NA	NA	NA	NA	0.094	0.9535	0.22	1.467e-05
3	171550202	rs9817267	A	G		0.485	0.446981	0.129259	0.000552931	0.523	0.517912	0.195037	0.0080331	0.4966	0.4686	0.1077	1.365e-05
3	172421059	rs481645	A	C	NCEH1	0.554	-0.506129	0.128773	8.70323e-05	0.533	0.0511107	0.205633	0.803752	0.5481	-0.3492	0.1091	0.001378
3	172421997	rs1105151	C	T	NCEH1	0.554	-0.513759	0.128847	6.86634e-05	0.534	0.0569969	0.205611	0.781672	0.5484	-0.3528	0.1092	0.001231
3	175308149	rs113556881	A	G	NAALADL2	0.865	-0.765178	0.193404	7.8148e-05	NA	NA	NA	NA	0.865	-0.7652	0.1934	7.61e-05
3	175309635	rs112060682	A	G	NAALADL2	0.857	-0.752147	0.188664	6.88581e-05	NA	NA	NA	NA	0.857	-0.7521	0.1887	6.7e-05
3	175309671	rs77897566	C	T	NAALADL2	0.143	0.752147	0.188664	6.88581e-05	NA	NA	NA	NA	0.143	0.7521	0.1887	6.7e-05
3	175309726	rs112491930	A	G	NAALADL2	0.857	-0.752147	0.188664	6.88581e-05	NA	NA	NA	NA	0.857	-0.7521	0.1887	6.7e-05
3	175310045	rs78601348	A	G	NAALADL2	0.855	-0.749301	0.188318	7.11383e-05	NA	NA	NA	NA	0.855	-0.7493	0.1883	6.923e-05
3	175310261	rs112576065	C	T	NAALADL2	0.145	0.749301	0.188318	7.11383e-05	NA	NA	NA	NA	0.145	0.7493	0.1883	6.923e-05
3	175310285	rs112847942	C	T	NAALADL2	0.145	0.749301	0.188318	7.11383e-05	NA	NA	NA	NA	0.145	0.7493	0.1883	6.923e-05
3	175310349	rs140019167	A	T	NAALADL2	0.855	-0.749301	0.188318	7.11383e-05	NA	NA	NA	NA	0.855	-0.7493	0.1883	6.923e-05
3	175310498	rs569819197	A	G	NAALADL2	0.143	0.752534	0.188744	6.8754e-05	NA	NA	NA	NA	0.143	0.7525	0.1887	6.69e-05
3	175311896	rs111959856	A	G	NAALADL2	0.843	-0.747387	0.181021	3.76345e-05	NA	NA	NA	NA	0.843	-0.7474	0.181	3.648e-05
3	175317600	rs79578809	C	T	NAALADL2	0.144	0.749794	0.188431	7.10702e-05	NA	NA	NA	NA	0.144	0.7498	0.1884	6.917e-05
3	178350522	rs13092609	A	T	KCNMB2	0.934	0.946318	0.251343	0.000170229	0.925	0.520605	0.373258	0.163366	0.9312	0.8135	0.2085	9.538e-05
3	178353935	rs13095759	C	T	KCNMB2	0.066	-0.941632	0.251736	0.000187614	0.077	-0.564205	0.37171	0.129332	0.0695	-0.823	0.2084	7.872e-05
3	181303188	rs200330156	A	AT		0.054	-1.15238	0.287567	6.31449e-05	NA	NA	NA	NA	0.054	-1.1524	0.2876	6.141e-05
3	183544607	rs35586421	A	G		0.188	0.435956	0.165265	0.00839167	0.194	0.76989	0.245363	0.00174715	0.1899	0.5402	0.1371	8.121e-05
3	185077676	rs73052886	A	G	MAP3K13	0.061	0.154873	0.266417	0.561076	0.047	1.88876	0.481068	9.16042e-05	0.0577	0.5618	0.2331	0.01592
3	185078851	rs73052891	A	T	MAP3K13	0.939	-0.138127	0.2668	0.6047	0.953	-1.88876	0.481068	9.16042e-05	0.9423	-0.5499	0.2333	0.01843
3	185082795	rs113959686	G	T	MAP3K13	0.945	-0.162276	0.277681	0.559004	0.956	-2.07488	0.495072	2.99633e-05	0.9476	-0.62	0.2422	0.01047
3	185085644	rs73052892	A	C	MAP3K13	0.945	-0.180983	0.278793	0.516289	0.957	-2.0128	0.502962	6.69903e-05	0.9478	-0.6115	0.2438	0.01214
3	185566639	rs113974081	C	T		0.409	0.677072	0.129053	1.67651e-07	NA	NA	NA	NA	0.409	0.6771	0.1291	1.551e-07
3	185566894	rs72625016	G	T		0.556	-0.582012	0.124919	3.33656e-06	0.547	0.27774	0.194382	0.153331	0.5534	-0.3307	0.1051	0.001649
3	185599192	rs80014124	C	T		0.046	-1.46331	0.300546	1.19036e-06	NA	NA	NA	NA	0.046	-1.4633	0.3005	1.123e-06
3	185601338	rs78673225	C	T		0.046	-1.51667	0.299965	4.57748e-07	NA	NA	NA	NA	0.046	-1.5167	0.3	4.278e-07
3	187674433	rs34894175	T	TAC		0.399	-0.144561	0.134336	0.281978	0.404	0.814742	0.201719	5.73567e-05	0.4005	0.1502	0.1118	0.1792
3	187674660	rs2590440	A	G		0.399	-0.144561	0.134336	0.281978	0.404	0.821117	0.201948	5.1193e-05	0.4005	0.1517	0.1119	0.1751
3	187675546	rs1445175	A	G		0.396	-0.103461	0.134309	0.44118	0.404	0.845567	0.201852	3.02275e-05	0.3985	0.1878	0.1118	0.09311
3	187675579	rs1445174	C	T		0.604	0.103461	0.134309	0.44118	0.596	-0.845567	0.201852	3.02275e-05	0.6015	-0.1878	0.1118	0.09311
3	187676163	rs2679509	A	G		0.603	0.0961448	0.134016	0.473185	0.594	-0.836104	0.202127	3.79112e-05	0.6003	-0.1885	0.1117	0.09143
3	189208644	rs1152859	C	T		0.029	0.951626	0.381169	0.0126009	0.021	-2.77878	0.692561	6.41372e-05	0.0271	0.0843	0.3339	0.8006
3	189816590	rs838704	A	G	LEPREL1	0.044	-0.672007	0.310659	0.0306198	0.06	-1.5574	0.405615	0.000130167	0.0499	-0.9994	0.2466	5.078e-05
3	189821683	rs3106806	A	C	LEPREL1	0.035	-0.914865	0.343209	0.00773251	0.048	-1.88041	0.449228	3.06447e-05	0.0398	-1.2707	0.2727	3.171e-06
3	189822485	rs66986166	C	CG	LEPREL1	0.107	-0.618718	0.204062	0.00245345	0.111	-0.998517	0.311303	0.00137689	0.1082	-0.7329	0.1707	1.753e-05
3	189824114	rs710591	A	G	LEPREL1	0.88	0.448556	0.193691	0.020645	0.872	1.25371	0.295152	2.34026e-05	0.8776	0.6909	0.1619	1.984e-05
3	190858545	rs6786499	C	T		0.878	0.889742	0.194987	5.27619e-06	NA	NA	NA	NA	0.878	0.8897	0.195	5.04e-06
3	192945200	rs74536722	C	T		0.967	0.0962292	0.356444	0.787205	0.971	-2.33229	0.591697	8.59518e-05	0.9681	-0.5504	0.3053	0.07143
3	193173778	rs59716181	G	T	ATP13A4	0.863	0.786823	0.186522	2.54529e-05	0.876	0.184631	0.302522	0.541784	0.8666	0.621	0.1588	9.189e-05
3	194308275	rs78448125	C	T		0.935	-1.01035	0.258892	9.75955e-05	NA	NA	NA	NA	0.935	-1.0104	0.2589	9.516e-05
3	194943821	rs6790425	A	G	XXYLT1	0.765	0.635784	0.152318	3.09115e-05	0.783	0.33774	0.239951	0.159547	0.7702	0.5502	0.1286	1.883e-05
3	194945995	rs76280678	A	G	XXYLT1	0.202	-0.646539	0.160065	5.51911e-05	0.183	-0.370503	0.252576	0.142687	0.1966	-0.5674	0.1352	2.704e-05
3	194947168	rs7624032	C	T	XXYLT1	0.803	0.649299	0.161808	6.17173e-05	0.82	0.316124	0.253503	0.212652	0.8079	0.5529	0.1364	5.048e-05
3	194947937	rs60999733	C	T	XXYLT1	0.197	-0.649299	0.161808	6.17173e-05	0.178	-0.361146	0.255148	0.15722	0.1916	-0.5666	0.1366	3.371e-05
3	194948191	rs57602429	C	T	XXYLT1	0.803	0.645339	0.161779	6.81943e-05	0.823	0.390636	0.256848	0.128573	0.8087	0.573	0.1369	2.841e-05
3	194948354	rs78961104	C	T	XXYLT1	0.803	0.649299	0.161808	6.17173e-05	0.823	0.390636	0.256848	0.128573	0.8087	0.5758	0.1369	2.601e-05
3	194948584	rs115894848	C	G	XXYLT1	0.803	0.649299	0.161808	6.17173e-05	0.823	0.390636	0.256848	0.128573	0.8087	0.5758	0.1369	2.601e-05
3	194948719	rs11923931	C	T	XXYLT1	0.197	-0.645339	0.161779	6.81943e-05	0.177	-0.409461	0.257748	0.112432	0.1913	-0.5787	0.137	2.409e-05
3	194949263		G	T	XXYLT1	0.803	0.645339	0.161779	6.81943e-05	0.823	0.409461	0.257748	0.112432	0.8087	0.5787	0.137	2.409e-05
3	194949425	rs200020410	G	GC	XXYLT1	0.198	-0.629904	0.161412	9.76499e-05	0.176	-0.401153	0.257853	0.120054	0.1918	-0.5655	0.1368	3.576e-05
3	194949603	rs150618722	A	G	XXYLT1	0.198	-0.629904	0.161412	9.76499e-05	0.176	-0.401153	0.257853	0.120054	0.1918	-0.5655	0.1368	3.576e-05
3	194949631	rs139710152	C	T	XXYLT1	0.198	-0.629904	0.161412	9.76499e-05	0.176	-0.401153	0.257853	0.120054	0.1918	-0.5655	0.1368	3.576e-05
3	194949658	rs149771311	C	G	XXYLT1	0.198	-0.629904	0.161412	9.76499e-05	0.176	-0.401153	0.257853	0.120054	0.1918	-0.5655	0.1368	3.576e-05
3	194949675	rs140573129	A	G	XXYLT1	0.198	-0.629904	0.161412	9.76499e-05	0.176	-0.401153	0.257853	0.120054	0.1918	-0.5655	0.1368	3.576e-05
3	194949685	rs143379542	A	G	XXYLT1	0.198	-0.629904	0.161412	9.76499e-05	0.176	-0.401153	0.257853	0.120054	0.1918	-0.5655	0.1368	3.576e-05
3	194949820		C	T	XXYLT1	0.198	-0.617063	0.161403	0.00013489	0.176	-0.401153	0.257853	0.120054	0.1918	-0.5563	0.1368	4.782e-05
3	194950008	rs60382109	A	G	XXYLT1	0.802	0.629904	0.161412	9.76499e-05	0.823	0.389051	0.257773	0.131511	0.8079	0.5621	0.1368	3.982e-05
3	194950311	rs11922694	C	G	XXYLT1	0.802	0.629904	0.161412	9.76499e-05	0.823	0.389051	0.257773	0.131511	0.8079	0.5621	0.1368	3.982e-05
3	194951273	rs367982470	C	CTTTGA	XXYLT1	0.802	0.62597	0.161382	0.000107594	0.823	0.401472	0.257538	0.119309	0.8079	0.5627	0.1368	3.879e-05
3	194951348	rs116167194	C	T	XXYLT1	0.198	-0.629904	0.161412	9.76499e-05	0.177	-0.401472	0.257538	0.119309	0.1921	-0.5655	0.1368	3.556e-05
3	194951707	rs115096231	A	C	XXYLT1	0.802	0.62597	0.161382	0.000107594	0.823	0.401472	0.257538	0.119309	0.8079	0.5627	0.1368	3.879e-05
3	194951720	rs116584253	C	T	XXYLT1	0.198	-0.62597	0.161382	0.000107594	0.177	-0.401472	0.257538	0.119309	0.1921	-0.5627	0.1368	3.879e-05
3	194952428		C	T	XXYLT1	0.789	0.557853	0.156441	0.000369193	0.809	0.481933	0.252098	0.0561722	0.7946	0.5367	0.1329	5.393e-05
3	194952481	rs34130895	A	ATT	XXYLT1	0.214	-0.57828	0.155582	0.000205971	0.19	-0.569371	0.251974	0.0240359	0.2074	-0.5758	0.1324	1.363e-05
3	194952573	rs11927247	A	G	XXYLT1	0.797	0.604103	0.159363	0.000153643	0.819	0.43642	0.256657	0.0893345	0.8031	0.5574	0.1354	3.832e-05
3	194952653	rs11928199	C	T	XXYLT1	0.211	-0.557853	0.156441	0.000369193	0.191	-0.481933	0.252098	0.0561722	0.2054	-0.5367	0.1329	5.393e-05
3	194953061	rs141482332	A	AC	XXYLT1	0.789	0.553686	0.156644	0.000415431	0.809	0.481933	0.252098	0.0561722	0.7946	0.5337	0.1331	6.04e-05
3	194953682	rs57844873	C	T	XXYLT1	0.202	-0.608568	0.159932	0.000144999	0.179	-0.459842	0.256945	0.0737813	0.1956	-0.567	0.1358	2.964e-05
3	194953928	rs59314385	G	T	XXYLT1	0.202	-0.608568	0.159932	0.000144999	0.179	-0.443623	0.257851	0.0856264	0.1956	-0.5627	0.1359	3.465e-05
3	194954620	rs12496607	C	T	XXYLT1	0.789	0.541717	0.156657	0.000553031	0.809	0.466437	0.252945	0.0654445	0.7945	0.5208	0.1332	9.2e-05
3	194954622	rs12497906	A	G	XXYLT1	0.789	0.541717	0.156657	0.000553031	0.809	0.466437	0.252945	0.0654445	0.7945	0.5208	0.1332	9.2e-05
3	194957930	rs150800754	A	AC	XXYLT1	0.793	0.571136	0.158513	0.000320399	0.816	0.449395	0.256007	0.079466	0.7994	0.5374	0.1348	6.677e-05
3	194959356	rs111798096	A	G	XXYLT1	0.797	0.584356	0.159389	0.000251117	0.817	0.423746	0.256579	0.098914	0.8026	0.5396	0.1354	6.727e-05
4	2301473	rs397964944	G	GA	ZFYVE28	0.43	0.584892	0.130418	7.61857e-06	NA	NA	NA	NA	0.43	0.5849	0.1304	7.3e-06
4	4219590	rs2920227	A	G	OTOP1	0.919	0.981916	0.233662	2.73191e-05	NA	NA	NA	NA	0.919	0.9819	0.2337	2.642e-05
4	16716626	rs74933541	G	T	LDB2	0.062	-0.228504	0.264598	0.387895	0.064	-1.80133	0.407998	1.10808e-05	0.0626	-0.6942	0.222	0.001767
4	16729633	rs116056784	A	C	LDB2	0.938	0.220451	0.264481	0.404627	0.936	1.80133	0.407998	1.10808e-05	0.9374	0.6882	0.2219	0.001929
4	16733397	rs16893898	C	T	LDB2	0.897	0.133532	0.212922	0.530622	0.901	1.38388	0.329885	2.94526e-05	0.8982	0.5012	0.1789	0.005081
4	16733670	rs76518675	C	T	LDB2	0.062	-0.227593	0.26564	0.39165	0.063	-1.73816	0.409559	2.37842e-05	0.0623	-0.6749	0.2229	0.00246
4	16744664	rs143014274	C	G	LDB2	0.102	-0.0881036	0.214619	0.681465	0.097	-1.35305	0.333168	5.22458e-05	0.1005	-0.4591	0.1804	0.01095
4	16828624		A	G	LDB2	0.012	2.67688	0.590627	6.10081e-06	0.01	0.282188	0.943724	0.764984	0.0114	2.0029	0.5007	6.32e-05
4	18961537	rs180680976	A	G		0.053	0.378209	0.291963	0.195298	0.038	2.11071	0.52356	5.92027e-05	0.0494	0.7892	0.255	0.001969
4	18965369	rs77583232	A	C		0.945	-0.395351	0.287322	0.168946	0.961	-2.13049	0.520369	4.54253e-05	0.9487	-0.8007	0.2515	0.001455
4	18968259	rs116344886	G	T		0.945	-0.395351	0.287322	0.168946	0.961	-2.13508	0.517561	3.97864e-05	0.9488	-0.8052	0.2512	0.001349
4	18968536	rs114755213	A	G		0.95	-0.418332	0.298218	0.160804	0.962	-2.11351	0.525353	6.13279e-05	0.9529	-0.8315	0.2593	0.001346
4	18969826	rs753258660	G	GA		0.05	0.418332	0.298218	0.160804	0.038	2.11351	0.525353	6.13279e-05	0.0471	0.8315	0.2593	0.001346
4	18970560	rs145636798	C	T		0.05	0.418332	0.298218	0.160804	0.038	2.11351	0.525353	6.13279e-05	0.0471	0.8315	0.2593	0.001346
4	22724413	rs61793656	A	C		0.883	0.149225	0.194196	0.442304	0.881	1.17026	0.298005	9.12995e-05	0.8824	0.4536	0.1627	0.005307
4	22868610	rs10009668	A	G		0.025	1.60035	0.40241	7.17378e-05	NA	NA	NA	NA	0.025	1.6003	0.4024	6.982e-05
4	22868619	rs10009511	C	T		0.975	-1.60035	0.40241	7.17378e-05	NA	NA	NA	NA	0.975	-1.6003	0.4024	6.982e-05
4	22870664	rs10018102	C	T		0.973	-1.72764	0.390756	1.02182e-05	NA	NA	NA	NA	0.973	-1.7276	0.3908	9.813e-06
4	22941879	rs10020519	C	T		0.967	-1.59238	0.360313	1.03044e-05	NA	NA	NA	NA	0.967	-1.5924	0.3603	9.896e-06
4	26780979	rs9990815	G	T		0.862	0.724732	0.185237	9.37221e-05	NA	NA	NA	NA	0.862	0.7247	0.1852	9.136e-05
4	27539293	rs115471049	C	T		0.022	1.85334	0.437685	2.37165e-05	NA	NA	NA	NA	0.022	1.8533	0.4377	2.291e-05
4	27550977	rs149424357	C	T		0.023	1.8991	0.432318	1.16398e-05	NA	NA	NA	NA	0.023	1.8991	0.4323	1.119e-05
4	27558728	rs60651113	A	G		0.976	-1.83712	0.416784	1.08674e-05	NA	NA	NA	NA	0.976	-1.8371	0.4168	1.044e-05
4	27576230	rs74532521	A	G		0.977	-1.7505	0.429034	4.63807e-05	NA	NA	NA	NA	0.977	-1.7505	0.429	4.502e-05
4	27580900	rs16879501	G	T		0.975	-1.60185	0.409526	9.41005e-05	NA	NA	NA	NA	0.975	-1.6018	0.4095	9.173e-05
4	29770254	rs16882245	A	G		0.843	-0.704456	0.176603	6.82174e-05	NA	NA	NA	NA	0.843	-0.7045	0.1766	6.637e-05
4	29771069	rs10651680	A	AAGAC		0.843	-0.691929	0.176542	9.10943e-05	0.834	-0.0446365	0.263458	0.865492	0.8402	-0.4913	0.1467	0.0008074
4	29771713	rs73809733	A	T		0.158	0.693962	0.176181	8.40217e-05	0.166	0.0446365	0.263458	0.865492	0.1605	0.4933	0.1465	0.000756
4	42393307	rs58410129	A	G		0.397	0.353914	0.130283	0.00664179	0.396	0.611623	0.19895	0.00216159	0.3967	0.4313	0.109	7.597e-05
4	42393312	rs3828528	C	T		0.397	0.353914	0.130283	0.00664179	0.396	0.611623	0.19895	0.00216159	0.3967	0.4313	0.109	7.597e-05
4	47351041	rs73133997	A	G	GABRB1	0.022	1.6006	0.436052	0.000246823	0.027	1.20099	0.606838	0.0480515	0.0237	1.4645	0.3541	3.538e-05
4	55710618	rs1497477	A	G		0.69	-0.468368	0.141362	0.000934914	0.676	-0.567385	0.210385	0.00710463	0.6856	-0.4992	0.1173	2.098e-05
4	55711509	rs2726630	A	T		0.617	-0.452892	0.133113	0.000678367	0.621	-0.478563	0.202071	0.0180406	0.6182	-0.4607	0.1112	3.412e-05
4	55712390	rs2646314	A	G		0.317	0.459195	0.140274	0.00107608	0.33	0.518064	0.211538	0.0144773	0.321	0.4772	0.1169	4.471e-05
4	56646368	rs116380790	A	G		0.96	1.39808	0.32633	1.90056e-05	NA	NA	NA	NA	0.96	1.3981	0.3263	1.833e-05
4	56648157	rs144385514	C	T		0.96	1.39808	0.32633	1.90056e-05	NA	NA	NA	NA	0.96	1.3981	0.3263	1.833e-05
4	58098923	rs189225578	A	G		0.988	2.37667	0.606654	9.17292e-05	NA	NA	NA	NA	0.988	2.3767	0.6067	8.941e-05
4	59560072	rs138290661	A	G		0.985	0.336841	0.534534	0.528647	0.989	3.93662	0.906033	1.5206e-05	0.986	1.2663	0.4604	0.00595
4	59956681	rs1495729	A	T		0.556	-0.467336	0.129541	0.000314867	0.544	-0.368393	0.196199	0.06069	0.5524	-0.4373	0.1081	5.228e-05
4	62644503	rs7676289	C	T	LPHN3	0.556	-0.0709574	0.130756	0.587404	0.572	-0.782167	0.196193	7.1355e-05	0.5609	-0.2897	0.1088	0.007755
4	63568318	rs149444467	C	G		0.04	1.28212	0.327088	9.09262e-05	NA	NA	NA	NA	0.04	1.2821	0.3271	8.862e-05
4	63624317	rs115721944	C	G		0.081	0.796003	0.238225	0.000845472	0.069	0.846051	0.394584	0.0322361	0.0778	0.8094	0.2039	7.227e-05
4	67672869	rs115305621	C	T		0.967	-0.00809148	0.364453	0.982289	0.977	2.61297	0.667699	9.65199e-05	0.9693	0.5936	0.3199	0.06353
4	75226765	rs10938123	A	T		0.044	-0.252734	0.312712	0.419049	0.043	-2.00882	0.482054	3.32203e-05	0.0437	-0.7729	0.2623	0.00322
4	75950184	rs11098475	C	T	PARM1	0.894	0.864419	0.217698	7.36121e-05	0.883	-0.292246	0.316505	0.356023	0.8905	0.4929	0.1794	0.005991
4	75964760	rs10006711	A	G	PARM1	0.894	0.847706	0.215527	8.60407e-05	0.877	-0.378714	0.309892	0.221934	0.8885	0.4479	0.1769	0.01137
4	76759778	rs138381936	C	T		0.017	-1.95722	0.491589	7.03975e-05	NA	NA	NA	NA	0.017	-1.9572	0.4916	6.851e-05
4	79649571	rs116228931	G	T		0.968	-1.51331	0.367667	3.97641e-05	0.975	0.262759	0.644025	0.683356	0.9697	-1.0767	0.3193	0.0007457
4	79656668	rs200558432	T	TATC		0.032	1.54101	0.366621	2.72041e-05	0.025	-0.262759	0.644025	0.683356	0.0303	1.0995	0.3186	0.0005585
4	79660744	rs115152227	C	T		0.032	1.48612	0.368763	5.73842e-05	0.025	-0.262759	0.644025	0.683356	0.0303	1.0543	0.32	0.0009858
4	79665229	rs17003441	G	T		0.032	1.46906	0.367708	6.64528e-05	0.025	-0.262759	0.644025	0.683356	0.0303	1.0433	0.3193	0.001086
4	79665576	rs78981526	A	G		0.032	1.46906	0.367708	6.64528e-05	0.025	-0.262759	0.644025	0.683356	0.0303	1.0433	0.3193	0.001086
4	79693553	rs12641797	G	T		0.751	-0.0652614	0.151992	0.667687	0.747	0.93838	0.221858	2.53284e-05	0.7497	0.2553	0.1254	0.04172
4	84978078	rs61259830	T	TTC		0.115	0.214411	0.200645	0.285345	0.108	-1.35462	0.32289	2.94163e-05	0.113	-0.2227	0.1704	0.1913
4	85659462		C	G	WDFY3	0.029	-0.0769048	0.383222	0.840965	0.023	-2.58489	0.656146	8.67281e-05	0.0275	-0.7148	0.3309	0.03076
4	85673635	rs141325078	A	G	WDFY3	0.021	-0.32002	0.440575	0.467678	0.015	-3.1748	0.812469	9.88352e-05	0.0196	-0.9687	0.3873	0.01238
4	85690581	rs138342887	A	T	WDFY3	0.029	-0.0908156	0.383137	0.812651	0.023	-2.58489	0.656146	8.67281e-05	0.0275	-0.725	0.3309	0.02844
4	85690796	rs184332136	C	T	WDFY3	0.971	0.0908156	0.383137	0.812651	0.977	2.58489	0.656146	8.67281e-05	0.9725	0.725	0.3309	0.02844
4	85714421	rs116510262	A	G	WDFY3	0.029	-0.0908156	0.383137	0.812651	0.023	-2.58489	0.656146	8.67281e-05	0.0275	-0.725	0.3309	0.02844
4	85716246	rs144017592	C	T	WDFY3	0.978	0.371727	0.438692	0.396877	0.985	3.1748	0.812469	9.88352e-05	0.9796	1.0045	0.386	0.009264
4	85720839	rs116639473	C	T	WDFY3	0.029	-0.0908156	0.383137	0.812651	0.023	-2.58489	0.656146	8.67281e-05	0.0275	-0.725	0.3309	0.02844
4	85721132	rs141953065	G	GTC	WDFY3	0.978	0.371727	0.438692	0.396877	0.985	3.1748	0.812469	9.88352e-05	0.9796	1.0045	0.386	0.009264
4	85721191	rs79229639	C	G	WDFY3	0.971	0.0908156	0.383137	0.812651	0.977	2.58489	0.656146	8.67281e-05	0.9725	0.725	0.3309	0.02844
4	85735594	rs150932381	A	G	WDFY3	0.978	0.371727	0.438692	0.396877	0.985	3.1748	0.812469	9.88352e-05	0.9796	1.0045	0.386	0.009264
4	85743806		A	G	WDFY3	0.978	0.371727	0.438692	0.396877	0.985	3.1748	0.812469	9.88352e-05	0.9796	1.0045	0.386	0.009264
4	85780503	rs115205418	C	T	WDFY3	0.028	-0.0263576	0.385605	0.945509	0.023	-2.58489	0.656146	8.67281e-05	0.0267	-0.6832	0.3324	0.03988
4	85782236	rs142046407	C	T	WDFY3	0.972	0.0515071	0.386762	0.894065	0.977	2.58489	0.656146	8.67281e-05	0.9733	0.7048	0.3332	0.03441
4	85783957	rs142829793	A	G	WDFY3	0.028	-0.0515071	0.386762	0.894065	0.023	-2.58489	0.656146	8.67281e-05	0.0267	-0.7048	0.3332	0.03441
4	85807113	rs80077671	A	C	WDFY3	0.979	0.39576	0.443929	0.372748	0.985	3.1748	0.812469	9.88352e-05	0.9804	1.0347	0.3896	0.007908
4	85813790	rs76626910	C	T	WDFY3	0.021	-0.39576	0.443929	0.372748	0.015	-3.1748	0.812469	9.88352e-05	0.0196	-1.0347	0.3896	0.007908
4	85814978	rs146463647	C	T	WDFY3	0.021	-0.39576	0.443929	0.372748	0.015	-3.1748	0.812469	9.88352e-05	0.0196	-1.0347	0.3896	0.007908
4	85817137	rs150669445	A	G	WDFY3	0.021	-0.39576	0.443929	0.372748	0.015	-3.1748	0.812469	9.88352e-05	0.0196	-1.0347	0.3896	0.007908
4	85951273	rs143596499	C	T		0.985	0.274727	0.522397	0.599005	0.989	3.68869	0.943664	9.83117e-05	0.9859	1.0755	0.457	0.01861
4	85970214	rs181995241	A	G		0.984	0.258157	0.508586	0.611779	0.987	3.48552	0.877488	7.5799e-05	0.9848	1.0697	0.44	0.01506
4	94208837	rs75745765	A	G	GRID2	0.893	-0.564386	0.207838	0.00666146	0.896	-1.11025	0.325132	0.000661364	0.8939	-0.7227	0.1751	3.672e-05
4	95360346	rs7697295	C	T		0.215	-0.0199198	0.165936	0.904457	0.212	0.993548	0.249402	7.22497e-05	0.2141	0.2911	0.1382	0.03514
4	109420846	rs62316335	G	T		0.798	0.622323	0.159355	9.65345e-05	0.807	0.0403617	0.25228	0.87292	0.8006	0.4563	0.1347	0.0007061
4	109977389	rs76967125	C	T	COL25A1	0.981	1.88888	0.485266	0.000101745	NA	NA	NA	NA	0.981	1.8889	0.4853	9.923e-05
4	110230271	rs10020100	C	T		0.096	0.877823	0.219316	6.44273e-05	0.107	0.0863933	0.314642	0.783693	0.0996	0.619	0.1799	0.0005804
4	110230796	rs376065330	A	AAGGTGATAATATG		0.11	0.851708	0.2077	4.24694e-05	0.117	0.118052	0.305752	0.699494	0.1122	0.6201	0.1718	0.0003074
4	110232161	rs10014623	A	G		0.097	0.876692	0.218597	6.22978e-05	0.108	0.121517	0.312892	0.697818	0.1006	0.629	0.1792	0.0004479
4	110232411		A	G		0.111	0.822924	0.2066	6.98783e-05	0.121	0.138969	0.301049	0.644446	0.1142	0.6039	0.1703	0.000392
4	110233220	rs28778907	C	T		0.894	-0.821322	0.21044	9.74875e-05	0.885	-0.144391	0.307036	0.638252	0.8911	-0.605	0.1736	0.0004918
4	110234525	rs60369504	C	T		0.889	-0.817975	0.206524	7.6762e-05	0.879	-0.144409	0.300745	0.6312	0.8858	-0.6021	0.1702	0.000405
4	110236244	rs2079107	A	G		0.111	0.817975	0.206524	7.6762e-05	0.121	0.144409	0.300745	0.6312	0.1142	0.6021	0.1702	0.000405
4	110238325	rs73838577	C	T		0.889	-0.830694	0.206745	6.03802e-05	0.883	-0.176559	0.303886	0.561355	0.8871	-0.6237	0.1709	0.0002634
4	110238705	rs28801475	C	G		0.111	0.830694	0.206745	6.03802e-05	0.117	0.176559	0.303886	0.561355	0.1129	0.6237	0.1709	0.0002634
4	110238812	rs7440843	C	G		0.111	0.830694	0.206745	6.03802e-05	0.117	0.176559	0.303886	0.561355	0.1129	0.6237	0.1709	0.0002634
4	110243217	rs113560983	G	T		0.097	0.872798	0.219013	6.93081e-05	0.108	0.127391	0.312509	0.683616	0.1006	0.6273	0.1794	0.0004697
4	110250481	rs10005272	G	T		0.097	0.872798	0.219013	6.93081e-05	0.108	0.127391	0.312509	0.683616	0.1006	0.6273	0.1794	0.0004697
4	110257063	rs60879426	C	G		0.097	0.862686	0.218906	8.33341e-05	0.108	0.127391	0.312509	0.683616	0.1006	0.6207	0.1793	0.0005369
4	113329224	rs111361166	C	T	ALPK1	0.962	1.07069	0.335485	0.00143259	0.968	1.65978	0.547626	0.00249479	0.9636	1.2314	0.2861	1.672e-05
4	113647631	rs13102981	A	G		0.856	-0.751505	0.18455	4.79938e-05	0.852	-0.109171	0.278546	0.695184	0.8548	-0.5556	0.1538	0.0003049
4	113651599	rs55864358	A	C		0.198	0.633842	0.160644	8.171e-05	0.195	0.279389	0.246109	0.256525	0.1971	0.5279	0.1345	8.689e-05
4	113674336	rs6855679	A	G		0.86	-0.81368	0.186974	1.40254e-05	0.851	-0.211603	0.276531	0.444312	0.8572	-0.6248	0.1549	5.49e-05
4	113679463	rs4834301	A	C		0.152	0.81081	0.182093	8.83923e-06	0.16	0.31664	0.267513	0.236808	0.1545	0.6543	0.1505	1.381e-05
4	113681985	rs28695904	C	T		0.847	-0.753722	0.180819	3.16865e-05	0.838	-0.339415	0.267232	0.204309	0.8442	-0.6236	0.1498	3.126e-05
4	113683786	rs11733070	C	T		0.826	-0.700513	0.171714	4.64945e-05	0.816	-0.243975	0.253018	0.335126	0.8228	-0.5565	0.1421	8.964e-05
4	113686153	rs13104700	C	T		0.849	-0.743517	0.181355	4.26286e-05	0.839	-0.308244	0.26736	0.249191	0.8458	-0.6064	0.1501	5.343e-05
4	113694761	rs6823522	A	G		0.167	0.70332	0.173931	5.41639e-05	0.182	0.235424	0.254645	0.355417	0.1718	0.5545	0.1436	0.0001131
4	113698329		A	G		0.864	-0.855012	0.188904	6.2779e-06	0.851	-0.218401	0.278625	0.433295	0.8599	-0.6545	0.1564	2.837e-05
4	113706821	rs2351928	C	T		0.855	-0.782886	0.183759	2.11381e-05	0.844	-0.312584	0.271592	0.250008	0.8515	-0.6352	0.1522	2.999e-05
4	113719312	rs6828678	C	T		0.855	-0.783547	0.184096	2.15363e-05	0.842	-0.352181	0.269735	0.191938	0.8509	-0.6465	0.1521	2.124e-05
4	113721486	rs7685179	G	T		0.748	-0.58067	0.146652	7.71308e-05	0.735	0.0344681	0.228155	0.879945	0.7442	-0.4008	0.1234	0.001158
4	113724319	rs6814650	A	T		0.748	-0.58067	0.146652	7.71308e-05	0.735	0.0344681	0.228155	0.879945	0.7442	-0.4008	0.1234	0.001158
4	113725152	rs6533651	C	T		0.748	-0.58067	0.146652	7.71308e-05	0.735	0.0344681	0.228155	0.879945	0.7442	-0.4008	0.1234	0.001158
4	113725170	rs796433171	G	GT		0.537	-0.449328	0.13003	0.000557994	0.514	-0.401768	0.199278	0.0440277	0.5301	-0.4351	0.1089	6.45e-05
4	113726734	rs5861113	A	ATTT		0.805	-0.662181	0.160731	3.9112e-05	0.787	-0.119346	0.246644	0.628565	0.7996	-0.5004	0.1347	0.0002026
4	113727203	rs7664934	C	G		0.854	-0.769751	0.183384	2.79032e-05	0.842	-0.385851	0.26973	0.152852	0.8502	-0.6484	0.1517	1.907e-05
4	113727688	rs10857020	A	T		0.252	0.584095	0.146642	6.98905e-05	0.265	-0.0344681	0.228155	0.879945	0.2558	0.4033	0.1234	0.001079
4	113728132	rs4626206	A	C		0.748	-0.584095	0.146642	6.98905e-05	0.735	0.0344681	0.228155	0.879945	0.7442	-0.4033	0.1234	0.001079
4	113730771	rs9683517	A	C		0.145	0.7773	0.183668	2.39612e-05	0.156	0.318144	0.271603	0.241707	0.1485	0.6332	0.1521	3.156e-05
4	113733843	rs6815412	C	T		0.253	0.583368	0.146588	7.09161e-05	0.265	-0.0456757	0.227848	0.841153	0.2565	0.3992	0.1233	0.001202
4	113742219	rs10461190	C	T	ANK2	0.854	-0.773741	0.183528	2.57313e-05	0.844	-0.314199	0.27136	0.247167	0.8509	-0.6295	0.152	3.46e-05
4	113742784	rs11098175	A	G	ANK2	0.854	-0.773741	0.183528	2.57313e-05	0.844	-0.314199	0.27136	0.247167	0.8509	-0.6295	0.152	3.46e-05
4	113746220	rs6830420	A	T	ANK2	0.146	0.780074	0.183573	2.21958e-05	0.156	0.283107	0.271578	0.297429	0.1491	0.6242	0.1521	4.055e-05
4	113750126	rs1074565	A	G	ANK2	0.854	-0.766498	0.183922	3.18072e-05	0.844	-0.283107	0.271578	0.297429	0.8509	-0.6145	0.1523	5.455e-05
4	113752458	rs12503408	C	T	ANK2	0.147	0.744062	0.183499	5.16518e-05	0.156	0.263879	0.271337	0.331005	0.1498	0.5934	0.152	9.475e-05
4	113757938	rs1839110	C	G	ANK2	0.148	0.752837	0.182815	3.94125e-05	0.154	0.281276	0.272734	0.302614	0.1499	0.6066	0.1519	6.472e-05
4	113759972	rs2882821	C	T	ANK2	0.854	-0.749816	0.183809	4.65337e-05	0.846	-0.262962	0.272962	0.335574	0.8515	-0.5979	0.1525	8.79e-05
4	113763011	rs2352024	C	T	ANK2	0.853	-0.76297	0.183632	3.36017e-05	0.846	-0.262962	0.272962	0.335574	0.8508	-0.6072	0.1524	6.744e-05
4	113765623	rs6817867	G	T	ANK2	0.851	-0.760511	0.181785	2.9655e-05	0.845	-0.260361	0.272557	0.339657	0.8492	-0.6065	0.1512	6.059e-05
4	113765784	rs6818236	C	T	ANK2	0.851	-0.760511	0.181785	2.9655e-05	0.845	-0.260361	0.272557	0.339657	0.8492	-0.6065	0.1512	6.059e-05
4	113768426	rs7655551	A	G	ANK2	0.142	0.819017	0.186176	1.13081e-05	0.148	0.21065	0.277151	0.447383	0.1439	0.6299	0.1545	4.591e-05
4	113769173	rs11098177	C	G	ANK2	0.851	-0.769696	0.181832	2.38637e-05	0.845	-0.260361	0.272557	0.339657	0.8492	-0.6128	0.1513	5.09e-05
4	113772458	rs11098178	A	G	ANK2	0.846	-0.715076	0.180567	7.69197e-05	0.839	-0.400267	0.269996	0.138492	0.8438	-0.6178	0.1501	3.855e-05
4	114190067	rs11937675	C	T	ANK2	0.926	1.01352	0.241925	2.89096e-05	0.945	-0.462379	0.428861	0.281198	0.9306	0.6572	0.2107	0.001814
4	116702049	rs139799753	A	G		0.043	1.15343	0.325101	0.000395209	0.031	1.31669	0.561696	0.0192462	0.04	1.1944	0.2814	2.187e-05
4	116703429	rs1371280	A	G		0.957	-1.15343	0.325101	0.000395209	0.969	-1.31669	0.561696	0.0192462	0.96	-1.1944	0.2814	2.187e-05
4	116704493	rs114547220	C	T		0.043	1.17384	0.324564	0.000304147	0.031	1.31669	0.561696	0.0192462	0.04	1.2096	0.281	1.675e-05
4	116706547	rs137903613	C	T		0.048	1.01402	0.307771	0.000998526	0.035	1.19745	0.531301	0.0244021	0.0447	1.0601	0.2663	6.873e-05
4	116707013	rs138626210	C	T		0.043	1.17384	0.324564	0.000304147	0.031	1.31669	0.561696	0.0192462	0.04	1.2096	0.281	1.675e-05
4	116708345	rs116251110	C	T		0.041	1.22938	0.33074	0.000205848	0.03	1.21014	0.571663	0.0344923	0.0382	1.2246	0.2863	1.89e-05
4	116712160	rs115252228	A	C		0.952	-1.01402	0.307771	0.000998526	0.965	-1.09676	0.528039	0.0380252	0.9553	-1.035	0.2659	9.925e-05
4	116722241	rs1821013	A	G		0.954	-1.20361	0.310009	0.000105977	0.965	-1.04259	0.538306	0.0530236	0.9567	-1.1635	0.2686	1.484e-05
4	116782036	rs115576151	A	G		0.045	1.23749	0.315202	8.86147e-05	0.034	1.10822	0.541989	0.0411169	0.0422	1.2048	0.2725	9.789e-06
4	116819985	rs116196184	A	T		0.956	-1.1918	0.316604	0.000170732	0.966	-1.15522	0.544903	0.0342232	0.9585	-1.1826	0.2738	1.561e-05
4	121070364	rs28668559	C	T		0.59	-0.515163	0.130978	8.60341e-05	0.596	0.109	0.200496	0.58679	0.5918	-0.3285	0.1097	0.00274
4	121103628	rs10023389	C	G		0.201	-0.644296	0.163851	8.63889e-05	0.193	-0.0977507	0.258337	0.705218	0.1987	-0.4875	0.1384	0.0004262
4	121105822	rs9997467	A	G		0.201	-0.644296	0.163851	8.63889e-05	0.192	-0.0889217	0.25921	0.731626	0.1984	-0.4857	0.1385	0.000453
4	137323700	rs113657862	A	G		0.097	0.187639	0.220454	0.394766	0.078	1.50012	0.371825	5.84575e-05	0.0921	0.529	0.1896	0.005276
4	142064334	rs114889527	C	T	RNF150	0.01	-2.51814	0.623842	5.58332e-05	NA	NA	NA	NA	0.01	-2.5181	0.6238	5.425e-05
4	149108360	rs4835496	A	C	NR3C2	0.097	-0.197778	0.22516	0.379815	0.095	1.35659	0.346614	9.6351e-05	0.0964	0.2635	0.1888	0.1629
4	149112087	rs4122852	A	G	NR3C2	0.902	0.150651	0.224429	0.502112	0.905	-1.36313	0.345933	8.63948e-05	0.9029	-0.2978	0.1883	0.1138
4	149113978	rs2356393	C	T	NR3C2	0.903	0.166556	0.224818	0.458852	0.905	-1.35875	0.346667	9.41579e-05	0.9036	-0.285	0.1886	0.1308
4	149114262	rs11099682	C	T	NR3C2	0.903	0.154641	0.225558	0.49303	0.905	-1.35875	0.346667	9.41579e-05	0.9036	-0.2955	0.1891	0.1181
4	149115454	rs3910057	A	G	NR3C2	0.096	-0.155073	0.225543	0.491795	0.094	1.38084	0.346725	7.26136e-05	0.0954	0.3016	0.1891	0.1107
4	149116534	rs3910054	A	G	NR3C2	0.096	-0.155073	0.225543	0.491795	0.094	1.38084	0.346725	7.26136e-05	0.0954	0.3016	0.1891	0.1107
4	149117390	rs4835501	A	G	NR3C2	0.904	0.139854	0.225339	0.534891	0.906	-1.38084	0.346725	7.26136e-05	0.9046	-0.3117	0.1889	0.09898
4	149127115	rs3910053	A	G	NR3C2	0.905	0.116943	0.226328	0.605411	0.906	-1.39061	0.347376	6.66293e-05	0.9053	-0.3323	0.1896	0.07971
4	149130801	rs3843413	C	T	NR3C2	0.093	-0.0474861	0.22869	0.835523	0.096	1.34852	0.343382	9.1236e-05	0.0939	0.3815	0.1903	0.04507
4	150856693	rs11726953	C	T		0.197	-0.740602	0.168651	1.17198e-05	0.216	0.280692	0.249693	0.261192	0.203	-0.4206	0.1398	0.002614
4	150866661	rs10032381	C	T		0.803	0.740602	0.168651	1.17198e-05	0.784	-0.280692	0.249693	0.261192	0.797	0.4206	0.1398	0.002614
4	156795018	rs185252610	A	G	TDO2	0.014	2.12448	0.540308	8.64645e-05	NA	NA	NA	NA	0.014	2.1245	0.5403	8.425e-05
4	156890975	rs34072028	A	T		0.79	-0.490427	0.160561	0.00227771	0.775	-0.601383	0.238683	0.0118882	0.7853	-0.525	0.1332	8.124e-05
4	156891790	rs67514122	A	C		0.79	-0.490427	0.160561	0.00227771	0.776	-0.603092	0.238833	0.0117025	0.7856	-0.5255	0.1332	8.023e-05
4	156892043	rs12233897	A	G		0.21	0.490427	0.160561	0.00227771	0.224	0.603092	0.238833	0.0117025	0.2144	0.5255	0.1332	8.023e-05
4	156912619	rs70954077	C	CTA		0.441	0.474854	0.128336	0.000220043	0.422	0.292589	0.20301	0.149794	0.4356	0.4228	0.1085	9.712e-05
4	157341806	rs1388009	A	G		0.228	-0.525613	0.155092	0.000711924	0.236	-0.465333	0.235095	0.048024	0.2304	-0.5073	0.1295	8.897e-05
4	158439057	rs112433130	C	T		0.819	-0.628856	0.168721	0.000197775	0.823	-0.378061	0.261487	0.148511	0.8202	-0.5551	0.1418	9.013e-05
4	158439377	rs1865354	A	G		0.181	0.628856	0.168721	0.000197775	0.177	0.378061	0.261487	0.148511	0.1798	0.5551	0.1418	9.013e-05
4	158439451	rs1865355	C	T		0.181	0.628856	0.168721	0.000197775	0.177	0.378061	0.261487	0.148511	0.1798	0.5551	0.1418	9.013e-05
4	158440404	rs34503597	A	G		0.181	0.628856	0.168721	0.000197775	0.178	0.374576	0.261311	0.15201	0.1801	0.554	0.1417	9.277e-05
4	158442663	rs4282235	A	G		0.787	-0.642844	0.159277	5.59505e-05	0.794	-0.406196	0.24762	0.101203	0.789	-0.5736	0.134	1.853e-05
4	158442854	rs4408999	A	G		0.213	0.642844	0.159277	5.59505e-05	0.206	0.406196	0.24762	0.101203	0.211	0.5736	0.134	1.853e-05
4	158443159	rs7670357	C	T		0.819	-0.628856	0.168721	0.000197775	0.822	-0.374576	0.261311	0.15201	0.8199	-0.554	0.1417	9.277e-05
4	158443230	rs7694905	C	T		0.213	0.642844	0.159277	5.59505e-05	0.206	0.406196	0.24762	0.101203	0.211	0.5736	0.134	1.853e-05
4	158443384	rs7675178	A	G		0.787	-0.642844	0.159277	5.59505e-05	0.794	-0.406196	0.24762	0.101203	0.789	-0.5736	0.134	1.853e-05
4	158443420	rs7675197	A	T		0.787	-0.642844	0.159277	5.59505e-05	0.794	-0.406196	0.24762	0.101203	0.789	-0.5736	0.134	1.853e-05
4	158443507	rs71587414	A	G		0.181	0.628856	0.168721	0.000197775	0.178	0.374576	0.261311	0.15201	0.1801	0.554	0.1417	9.277e-05
4	158443532	rs12054611	A	C		0.213	0.642844	0.159277	5.59505e-05	0.206	0.406196	0.24762	0.101203	0.211	0.5736	0.134	1.853e-05
4	158444071	rs1550017	A	G		0.213	0.642844	0.159277	5.59505e-05	0.206	0.406196	0.24762	0.101203	0.211	0.5736	0.134	1.853e-05
4	158444900	rs12054541	A	G		0.819	-0.628856	0.168721	0.000197775	0.822	-0.374576	0.261311	0.15201	0.8199	-0.554	0.1417	9.277e-05
4	158445089	rs12054635	C	T		0.819	-0.628856	0.168721	0.000197775	0.822	-0.374576	0.261311	0.15201	0.8199	-0.554	0.1417	9.277e-05
4	158445097	rs12054548	A	T		0.819	-0.628856	0.168721	0.000197775	0.822	-0.374576	0.261311	0.15201	0.8199	-0.554	0.1417	9.277e-05
4	158448179	rs964241	A	C		0.814	-0.617262	0.167431	0.000231886	0.818	-0.402132	0.257036	0.117985	0.8152	-0.5532	0.1403	8.046e-05
4	158448301	rs964242	A	G		0.814	-0.617262	0.167431	0.000231886	0.818	-0.402132	0.257036	0.117985	0.8152	-0.5532	0.1403	8.046e-05
4	158448550	rs397881039	C	CA		0.788	-0.6419	0.159288	5.74358e-05	0.794	-0.406196	0.24762	0.101203	0.7898	-0.5729	0.134	1.898e-05
4	158450704	rs6822089	A	T		0.188	0.634103	0.166788	0.00014694	0.182	0.401938	0.257009	0.118124	0.1862	0.5653	0.1399	5.334e-05
4	158899563	rs398092933	G	GAA		0.932	-0.98114	0.253921	0.000114308	0.934	-0.546852	0.405719	0.177978	0.9326	-0.8589	0.2152	6.595e-05
4	162668515	rs141644177	A	AT	FSTL5	0.92	0.885329	0.231274	0.000132228	0.92	0.510987	0.36791	0.165144	0.92	0.7793	0.1958	6.889e-05
4	162668979	rs4691024	A	G	FSTL5	0.148	-0.696582	0.181786	0.000130204	0.135	-0.36469	0.293865	0.214863	0.1444	-0.6047	0.1546	9.168e-05
4	162669177	rs4691793	A	G	FSTL5	0.852	0.696582	0.181786	0.000130204	0.865	0.36469	0.293865	0.214863	0.8556	0.6047	0.1546	9.168e-05
4	162669981	rs2164128	A	G	FSTL5	0.195	-0.630072	0.162346	0.000106612	0.177	-0.36884	0.26362	0.162051	0.1901	-0.5582	0.1382	5.383e-05
4	162670941	rs199662552	C	CAA	FSTL5	0.196	-0.645155	0.162015	7.02028e-05	0.179	-0.330022	0.262531	0.208988	0.1913	-0.5582	0.1379	5.146e-05
4	162671867	rs72977149	A	T	FSTL5	0.195	-0.630072	0.162346	0.000106612	0.178	-0.366183	0.26361	0.165077	0.1903	-0.5575	0.1382	5.505e-05
4	162672192	rs375729156	A	AATC	FSTL5	0.195	-0.630072	0.162346	0.000106612	0.178	-0.366183	0.26361	0.165077	0.1903	-0.5575	0.1382	5.505e-05
4	162672396	rs59520308	G	T	FSTL5	0.805	0.630072	0.162346	0.000106612	0.822	0.366183	0.26361	0.165077	0.8097	0.5575	0.1382	5.505e-05
4	162672618	rs58738505	A	G	FSTL5	0.195	-0.630072	0.162346	0.000106612	0.178	-0.366183	0.26361	0.165077	0.1903	-0.5575	0.1382	5.505e-05
4	162673374	rs201093843	C	T	FSTL5	0.081	-0.867241	0.230296	0.000169748	0.082	-0.482736	0.363733	0.184724	0.0813	-0.7572	0.1946	9.958e-05
4	162673379	rs553959375	A	G	FSTL5	0.908	0.928952	0.21913	2.32128e-05	0.908	0.633421	0.340777	0.0633252	0.908	0.8425	0.1843	4.853e-06
4	162674652	rs77933851	C	G	FSTL5	0.805	0.631095	0.16233	0.000103738	0.821	0.364351	0.262731	0.165786	0.8094	0.5574	0.1381	5.43e-05
4	162674809	rs72977161	C	T	FSTL5	0.805	0.631095	0.16233	0.000103738	0.822	0.370014	0.263681	0.160817	0.8097	0.5593	0.1382	5.203e-05
4	162674920	rs113647139	C	T	FSTL5	0.805	0.631095	0.16233	0.000103738	0.821	0.364351	0.262731	0.165786	0.8094	0.5574	0.1381	5.43e-05
4	162675184	rs6829112	A	G	FSTL5	0.805	0.631095	0.16233	0.000103738	0.821	0.364351	0.262731	0.165786	0.8094	0.5574	0.1381	5.43e-05
4	162676444	rs59537703	C	T	FSTL5	0.802	0.665118	0.161904	4.1132e-05	0.817	0.395378	0.261103	0.130244	0.8062	0.5902	0.1376	1.792e-05
4	162676486	rs60168455	A	G	FSTL5	0.802	0.665118	0.161904	4.1132e-05	0.817	0.395378	0.261103	0.130244	0.8062	0.5902	0.1376	1.792e-05
4	162677219	rs7685359	C	T	FSTL5	0.802	0.665118	0.161904	4.1132e-05	0.816	0.403969	0.260065	0.120627	0.8059	0.5922	0.1374	1.644e-05
4	162677299	rs7685872	A	G	FSTL5	0.198	-0.665118	0.161904	4.1132e-05	0.184	-0.403969	0.260065	0.120627	0.1941	-0.5922	0.1374	1.644e-05
4	162677362	rs141005073	G	GAAC	FSTL5	0.2	-0.666228	0.161356	3.76033e-05	0.186	-0.406725	0.258877	0.11644	0.1961	-0.5936	0.1369	1.457e-05
4	162677463	rs7690805	A	G	FSTL5	0.198	-0.665118	0.161904	4.1132e-05	0.184	-0.37587	0.260009	0.14857	0.1941	-0.5843	0.1374	2.124e-05
4	162677784	rs57283498	C	T	FSTL5	0.802	0.665118	0.161904	4.1132e-05	0.816	0.37587	0.260009	0.14857	0.8059	0.5843	0.1374	2.124e-05
4	162679460	rs72977176	A	G	FSTL5	0.198	-0.665118	0.161904	4.1132e-05	0.183	-0.378772	0.260963	0.14694	0.1938	-0.5855	0.1376	2.081e-05
4	162686356	rs6839549	A	G	FSTL5	0.852	0.697282	0.181935	0.000129826	0.86	0.355525	0.290169	0.220745	0.8543	0.6008	0.1541	9.7e-05
4	162688136	rs727566	C	T	FSTL5	0.852	0.697282	0.181935	0.000129826	0.86	0.355525	0.290169	0.220745	0.8543	0.6008	0.1541	9.7e-05
4	162708082	rs17041484	A	G	FSTL5	0.147	-0.700108	0.182665	0.000129749	0.141	-0.394067	0.288573	0.172349	0.1453	-0.6126	0.1543	7.222e-05
4	175595278	rs74955269	C	G	GLRA3	0.966	-1.68826	0.35549	2.15495e-06	0.965	-0.150704	0.545736	0.782485	0.9657	-1.2302	0.2979	3.627e-05
4	175739954	rs28572132	C	T	GLRA3	0.702	0.528771	0.138506	0.000137888	0.724	0.303439	0.224125	0.176048	0.7081	0.4665	0.1178	7.517e-05
4	175740041	rs13105754	G	T	GLRA3	0.825	0.639659	0.170082	0.000173077	0.836	0.51387	0.271107	0.0582911	0.8281	0.6041	0.1441	2.751e-05
4	189624873	rs1006838	A	G		0.089	0.223713	0.222922	0.31569	0.108	1.30842	0.306446	2.12433e-05	0.0956	0.5991	0.1803	0.0008898
4	189627477	rs188305766	C	T		0.842	-0.282724	0.175968	0.108248	0.833	-1.06571	0.258971	4.15437e-05	0.8392	-0.53	0.1455	0.0002708
4	189627488	rs543948353	C	T		0.155	0.256767	0.177194	0.147438	0.166	1.06338	0.25928	4.40757e-05	0.1585	0.5136	0.1463	0.0004473
4	189627489	rs560893757	C	T		0.842	-0.274226	0.175992	0.119314	0.832	-1.044	0.258951	5.91567e-05	0.8388	-0.5174	0.1456	0.0003781
4	189627498	rs113580314	C	T		0.842	-0.282724	0.175968	0.108248	0.833	-1.06571	0.258971	4.15437e-05	0.8392	-0.53	0.1455	0.0002708
4	189627516	rs60666400	G	T		0.841	-0.276655	0.175984	0.116062	0.834	-1.05408	0.259607	5.24437e-05	0.8388	-0.5214	0.1457	0.0003442
4	189627521	rs6843553	C	T		0.471	0.302164	0.131719	0.0218704	0.465	0.753406	0.201967	0.000200856	0.4692	0.4368	0.1103	7.518e-05
4	189627524	rs75774909	G	T		0.84	-0.265205	0.175397	0.130649	0.833	-1.06556	0.25908	4.19549e-05	0.8378	-0.5167	0.1452	0.000374
4	189628128	rs35906916	A	T		0.922	-0.299927	0.234994	0.201958	0.906	-1.31631	0.334069	8.64703e-05	0.9167	-0.6364	0.1922	0.00093
4	189635677	rs68102079	A	G		0.07	0.296068	0.245686	0.228287	0.092	1.52053	0.337074	7.13678e-06	0.0776	0.7209	0.1985	0.0002824
4	189638410	rs35819572	A	G		0.89	-0.11652	0.203679	0.567319	0.862	-1.14886	0.285096	5.96316e-05	0.8805	-0.4654	0.1657	0.004985
4	189639943	rs60492175	A	AC		0.076	0.233075	0.235885	0.323203	0.098	1.46246	0.326241	8.12967e-06	0.0836	0.6551	0.1912	0.0006097
4	189640263	rs11724074	C	T		0.07	0.104175	0.246403	0.67249	0.091	1.56181	0.338139	4.30846e-06	0.0773	0.6097	0.1991	0.0022
5	3080880	rs3104064	C	T		0.286	-0.50224	0.141869	0.00040696	0.289	-0.479514	0.22017	0.0296207	0.2869	-0.4956	0.1193	3.245e-05
5	3445521	rs12657390	G	T		0.768	0.592802	0.151984	9.84787e-05	0.769	0.0447562	0.233324	0.847918	0.7683	0.4295	0.1273	0.0007438
5	14326552	rs7710935	C	T	TRIO	0.14	0.118734	0.187109	0.525764	0.143	-1.0662	0.272339	9.59066e-05	0.141	-0.2612	0.1542	0.09028
5	14331673	rs62344976	C	T	TRIO	0.139	0.114372	0.187295	0.541484	0.141	-1.09579	0.273431	6.5425e-05	0.1396	-0.2721	0.1545	0.07825
5	23544626	rs142403731	A	G		0.01	2.67451	0.640547	3.07376e-05	NA	NA	NA	NA	0.01	2.6745	0.6405	2.975e-05
5	26102815	rs140942874	A	T		0.988	0.595771	0.59973	0.320608	0.987	3.61307	0.858357	2.76808e-05	0.9877	1.5856	0.4916	0.001259
5	26112218	rs541868437	A	T		0.988	0.565457	0.591172	0.338908	0.987	3.61307	0.858357	2.76808e-05	0.9877	1.546	0.4869	0.001497
5	26113333	rs142774929	C	G		0.988	0.565457	0.591172	0.338908	0.987	3.61307	0.858357	2.76808e-05	0.9877	1.546	0.4869	0.001497
5	27051618	rs77643726	C	T	CDH9	0.029	-1.66736	0.377963	1.06901e-05	NA	NA	NA	NA	0.029	-1.6674	0.378	1.027e-05
5	27095412	rs76353018	C	T	CDH9	0.021	-1.81737	0.431543	2.62578e-05	NA	NA	NA	NA	0.021	-1.8174	0.4315	2.539e-05
5	28008783	rs151087390	C	G		0.02	-1.83949	0.470618	9.51974e-05	0.022	-0.110704	0.680462	0.870793	0.0206	-1.2801	0.3871	0.0009422
5	28011864	rs115901535	C	T		0.98	1.83949	0.470618	9.51974e-05	0.978	0.110704	0.680462	0.870793	0.9794	1.2801	0.3871	0.0009422
5	28111624	rs145742434	G	T		0.023	-1.70031	0.432766	8.7559e-05	0.024	0.366844	0.630796	0.560983	0.0233	-1.0387	0.3569	0.003605
5	28125077	rs114236050	C	T		0.98	2.0966	0.466917	7.42447e-06	0.977	-0.00127906	0.659256	0.998452	0.979	1.3958	0.381	0.0002491
5	28126885	rs116376176	C	T		0.977	1.71086	0.432125	7.72373e-05	0.975	-0.19069	0.60973	0.754533	0.9763	1.0751	0.3526	0.002293
5	28128329	rs114270453	C	T		0.013	-2.42461	0.577058	2.73954e-05	0.015	-0.101195	0.80466	0.899943	0.0137	-1.6355	0.4689	0.0004872
5	28128583	rs142798192	G	T		0.02	-2.0966	0.466917	7.42447e-06	0.023	0.00127906	0.659256	0.998452	0.021	-1.3958	0.381	0.0002491
5	28130091	rs114437432	A	G		0.98	2.0966	0.466917	7.42447e-06	0.977	-0.00127906	0.659256	0.998452	0.979	1.3958	0.381	0.0002491
5	28138586	rs150669608	A	G		0.023	-1.67867	0.430551	9.91015e-05	0.025	0.13324	0.605194	0.825786	0.0237	-1.0698	0.3508	0.002294
5	28147376	rs114927141	A	C		0.977	1.70696	0.43208	8.00547e-05	0.974	-0.320947	0.596538	0.590673	0.976	1.0092	0.3499	0.003928
5	28147932	rs114652267	A	G		0.023	-1.70696	0.43208	8.00547e-05	0.026	0.320947	0.596538	0.590673	0.024	-1.0092	0.3499	0.003928
5	28150174	rs148197202	A	G		0.977	1.70696	0.43208	8.00547e-05	0.974	-0.320947	0.596538	0.590673	0.976	1.0092	0.3499	0.003928
5	28156824	rs116517272	C	T		0.02	-2.10938	0.46706	6.57592e-06	0.023	-0.0095149	0.654026	0.988395	0.021	-1.4002	0.3801	0.0002298
5	28159080		C	T		0.977	1.77034	0.430198	3.98988e-05	0.974	-0.252442	0.601163	0.674623	0.976	1.0853	0.3498	0.001921
5	28160879	rs114396972	A	T		0.977	1.77034	0.430198	3.98988e-05	0.974	-0.252442	0.601163	0.674623	0.976	1.0853	0.3498	0.001921
5	28164181		A	G		0.021	-2.17604	0.454775	1.80728e-06	0.024	-0.0831836	0.642015	0.896933	0.022	-1.4768	0.3711	6.908e-05
5	28165526	rs140024686	C	T		0.977	1.80784	0.433301	3.11565e-05	0.974	-0.252442	0.601163	0.674623	0.976	1.1034	0.3515	0.001694
5	28172438	rs138847794	A	C		0.978	1.83473	0.445445	3.92714e-05	0.974	-0.252442	0.601163	0.674623	0.9766	1.095	0.3579	0.002218
5	28175099	rs140393110	A	G		0.978	1.83473	0.445445	3.92714e-05	0.974	-0.252442	0.601163	0.674623	0.9766	1.095	0.3579	0.002218
5	28178550	rs116036887	C	T		0.978	1.83473	0.445445	3.92714e-05	0.974	-0.252442	0.601163	0.674623	0.9766	1.095	0.3579	0.002218
5	28180512	rs141296296	A	T		0.019	-2.23608	0.473544	2.46026e-06	0.023	-0.0095149	0.654026	0.988395	0.0204	-1.4703	0.3836	0.0001265
5	28185461	rs541398984	C	T		0.981	2.29148	0.477996	1.72822e-06	0.978	-0.241041	0.671601	0.719734	0.98	1.44	0.3894	0.0002177
5	28187093	rs115292374	C	T		0.978	1.82173	0.447304	4.78739e-05	0.976	-0.474151	0.614437	0.440466	0.9773	1.0265	0.3616	0.004534
5	28188291	rs145776286	A	C		0.02	-2.19621	0.460644	1.96702e-06	0.023	0.0501303	0.646994	0.938254	0.021	-1.4406	0.3753	0.0001236
5	28200978	rs573589908	A	G		0.98	2.18231	0.464814	2.80536e-06	0.978	-0.0452487	0.65256	0.944731	0.9793	1.4325	0.3786	0.0001544
5	28209897	rs10036460	C	T		0.978	1.86843	0.441191	2.36587e-05	0.975	0.0359132	0.620476	0.953855	0.977	1.2531	0.3596	0.0004922
5	28211658	rs114303623	A	G		0.022	-1.86843	0.441191	2.36587e-05	0.025	-0.0359132	0.620476	0.953855	0.023	-1.2531	0.3596	0.0004922
5	28217325	rs373246042	G	GGCATGTGCCACTTTAGGGAATTTCCACCT		0.978	1.90407	0.438924	1.49284e-05	0.975	0.0860875	0.615607	0.88881	0.977	1.2914	0.3574	0.0003023
5	28217997	rs140603282	C	T		0.977	1.86461	0.433515	1.76239e-05	NA	NA	NA	NA	0.977	1.8646	0.4335	1.699e-05
5	28221862	rs114658941	C	T		0.023	-1.82986	0.43016	2.17557e-05	NA	NA	NA	NA	0.023	-1.8299	0.4302	2.101e-05
5	28224663	rs28584868	G	T		0.023	-1.82986	0.43016	2.17557e-05	NA	NA	NA	NA	0.023	-1.8299	0.4302	2.101e-05
5	28228088	rs137927163	C	T		0.023	-1.83147	0.437119	2.88476e-05	0.025	0.0261215	0.620421	0.966424	0.0237	-1.2153	0.3573	0.0006717
5	28230314	rs114581631	G	T		0.023	-1.83147	0.437119	2.88476e-05	0.024	-0.0848045	0.625176	0.892123	0.0233	-1.258	0.3582	0.0004456
5	28232883	rs10056767	G	T		0.023	-1.77806	0.432084	3.99154e-05	0.024	-0.0848045	0.625176	0.892123	0.0233	-1.2307	0.3555	0.0005354
5	28238142	rs529141603	C	T		0.977	1.77806	0.432084	3.99154e-05	0.976	0.0848045	0.625176	0.892123	0.9767	1.2307	0.3555	0.0005354
5	28238566	rs28566502	A	T		0.023	-1.77806	0.432084	3.99154e-05	0.024	-0.0848045	0.625176	0.892123	0.0233	-1.2307	0.3555	0.0005354
5	28246378	rs10074915	A	T		0.023	-1.77806	0.432084	3.99154e-05	NA	NA	NA	NA	0.023	-1.7781	0.4321	3.87e-05
5	28252770	rs10066326	A	T		0.023	-1.77806	0.432084	3.99154e-05	0.024	-0.0104642	0.630381	0.986759	0.0233	-1.2131	0.3564	0.0006649
5	28254955	rs114302659	A	G		0.977	1.77806	0.432084	3.99154e-05	0.976	0.0104642	0.630381	0.986759	0.9767	1.2131	0.3564	0.0006649
5	28274377	rs114939095	G	T		0.023	-1.83147	0.437119	2.88476e-05	NA	NA	NA	NA	0.023	-1.8315	0.4371	2.791e-05
5	28277144	rs143455592	T	TATC		0.023	-1.83147	0.437119	2.88476e-05	NA	NA	NA	NA	0.023	-1.8315	0.4371	2.791e-05
5	28279461	rs9632394	C	T		0.977	1.83147	0.437119	2.88476e-05	NA	NA	NA	NA	0.977	1.8315	0.4371	2.791e-05
5	28280793	rs116616690	C	T		0.023	-1.83147	0.437119	2.88476e-05	NA	NA	NA	NA	0.023	-1.8315	0.4371	2.791e-05
5	28285455		A	G		0.023	-1.83147	0.437119	2.88476e-05	NA	NA	NA	NA	0.023	-1.8315	0.4371	2.791e-05
5	28291926	rs10041488	C	T		0.978	1.81287	0.43894	3.74106e-05	NA	NA	NA	NA	0.978	1.8129	0.4389	3.626e-05
5	28293787	rs114165578	A	C		0.021	-1.76438	0.448498	8.5755e-05	NA	NA	NA	NA	0.021	-1.7644	0.4485	8.355e-05
5	28329138	rs561240623	G	GT		0.987	2.22329	0.561408	7.69092e-05	0.984	0.249959	0.77284	0.746431	0.986	1.5417	0.4542	0.0006884
5	28381714	rs114682989	C	T		0.972	1.5436	0.391063	8.11819e-05	0.974	0.211961	0.621103	0.732968	0.9726	1.1656	0.3309	0.0004282
5	28382002	rs114375258	C	T		0.028	-1.5436	0.391063	8.11819e-05	0.026	-0.211961	0.621103	0.732968	0.0274	-1.1656	0.3309	0.0004282
5	28382293	rs111978896	C	T		0.972	1.5436	0.391063	8.11819e-05	0.974	0.211961	0.621103	0.732968	0.9726	1.1656	0.3309	0.0004282
5	28383877	rs111823435	A	G		0.972	1.5436	0.391063	8.11819e-05	0.974	0.211961	0.621103	0.732968	0.9726	1.1656	0.3309	0.0004282
5	28383940	rs112845760	A	G		0.028	-1.5436	0.391063	8.11819e-05	0.026	-0.211961	0.621103	0.732968	0.0274	-1.1656	0.3309	0.0004282
5	28385085	rs111689698	T	TA		0.972	1.5436	0.391063	8.11819e-05	0.974	0.211961	0.621103	0.732968	0.9726	1.1656	0.3309	0.0004282
5	28385160	rs112373672	A	G		0.027	-1.5766	0.395723	6.96132e-05	0.026	-0.211961	0.621103	0.732968	0.0267	-1.1826	0.3337	0.000395
5	28386124	rs113629291	C	T		0.028	-1.5436	0.391063	8.11819e-05	0.027	-0.179564	0.611557	0.769105	0.0277	-1.1477	0.3295	0.0004947
5	28386746	rs111528836	C	T		0.028	-1.5436	0.391063	8.11819e-05	0.027	-0.179564	0.611557	0.769105	0.0277	-1.1477	0.3295	0.0004947
5	28393548	rs7716551	A	C		0.977	1.75982	0.429874	4.37392e-05	0.975	0.378172	0.63078	0.548941	0.9764	1.3216	0.3552	0.0001988
5	28396554	rs111987061	A	G		0.05	-1.15138	0.295032	9.76145e-05	0.044	-0.924454	0.491679	0.0603421	0.0484	-1.0913	0.253	1.605e-05
5	28423759	rs141672877	C	T		0.019	-1.88424	0.469725	6.20794e-05	0.021	-0.347198	0.684036	0.611854	0.0196	-1.3917	0.3872	0.0003255
5	28506183	rs115318798	A	G		0.019	-2.11558	0.475793	9.10023e-06	0.023	-0.181383	0.667437	0.785856	0.0203	-1.4639	0.3874	0.0001579
5	28525596	rs151241945	C	T		0.98	2.11028	0.463267	5.47632e-06	0.978	0.372519	0.680496	0.584199	0.9794	1.56	0.3829	4.631e-05
5	28526344		C	T		0.98	2.11028	0.463267	5.47632e-06	0.978	0.372519	0.680496	0.584199	0.9794	1.56	0.3829	4.631e-05
5	28526443	rs188433674	A	G		0.02	-2.11028	0.463267	5.47632e-06	0.022	-0.372519	0.680496	0.584199	0.0206	-1.56	0.3829	4.631e-05
5	28538283	rs149499404	C	T		0.98	2.11028	0.463267	5.47632e-06	0.978	0.372519	0.680496	0.584199	0.9794	1.56	0.3829	4.631e-05
5	28552131	rs59516317	A	G		0.02	-2.11028	0.463267	5.47632e-06	0.022	-0.372519	0.680496	0.584199	0.0206	-1.56	0.3829	4.631e-05
5	28559056	rs116013491	C	T		0.98	2.09024	0.467931	8.27482e-06	0.978	0.372519	0.680496	0.584199	0.9794	1.5388	0.3856	6.582e-05
5	28578855	rs114056821	C	T		0.02	-2.15621	0.465607	3.81991e-06	0.022	-0.372519	0.680496	0.584199	0.0206	-1.5874	0.3843	3.611e-05
5	28579566	rs138417536	T	TA		0.02	-2.15621	0.465607	3.81991e-06	0.022	-0.372519	0.680496	0.584199	0.0206	-1.5874	0.3843	3.611e-05
5	28589778	rs114809487	C	T		0.02	-2.15621	0.465607	3.81991e-06	0.022	-0.372519	0.680496	0.584199	0.0206	-1.5874	0.3843	3.611e-05
5	28594795	rs114958804	C	T		0.98	2.15621	0.465607	3.81991e-06	0.978	0.372519	0.680496	0.584199	0.9794	1.5874	0.3843	3.611e-05
5	28602181	rs115556219	C	T		0.98	2.19839	0.467063	2.64855e-06	0.98	0.654827	0.708491	0.355553	0.98	1.7308	0.39	9.06e-06
5	28602471	rs114716722	A	G		0.019	-2.2748	0.471403	1.47722e-06	0.02	-0.654827	0.708491	0.355553	0.0193	-1.7777	0.3925	5.911e-06
5	28613607	rs554490184	A	G		0.018	-2.32055	0.485709	1.87294e-06	0.02	-0.657041	0.715826	0.358881	0.0186	-1.7961	0.4019	7.865e-06
5	28617704	rs146843658	A	C		0.979	2.27947	0.449461	4.2254e-07	0.979	0.369123	0.686941	0.591139	0.979	1.7068	0.3761	5.677e-06
5	28620800	rs114525516	C	T		0.978	2.24421	0.441431	3.96133e-07	0.978	0.27097	0.680349	0.6905	0.978	1.6596	0.3703	7.406e-06
5	28622557	rs150950614	C	T		0.979	2.27947	0.449461	4.2254e-07	0.978	0.27097	0.680349	0.6905	0.9787	1.6692	0.375	8.544e-06
5	28634589	rs114294333	A	T		0.98	2.24905	0.458243	9.77459e-07	0.978	0.204926	0.674211	0.761224	0.9794	1.6031	0.379	2.337e-05
5	32941161	rs10067052	A	G		0.591	0.053826	0.12956	0.677845	0.568	-0.817316	0.200677	4.9741e-05	0.5842	-0.2025	0.1088	0.06288
5	32991674	rs73069125	C	T		0.901	0.1744	0.216369	0.420301	0.913	1.42081	0.353438	6.21186e-05	0.9043	0.5142	0.1845	0.005331
5	33410707	rs17550908	G	T		0.301	-0.0758676	0.139542	0.5867	0.302	-0.902966	0.210656	1.9726e-05	0.3013	-0.3281	0.1163	0.004796
5	33410912	rs11747165	A	T		0.3	-0.0811809	0.139551	0.560801	0.302	-0.902966	0.210656	1.9726e-05	0.3006	-0.3318	0.1163	0.004341
5	33440306	rs3756663	A	C		0.176	0.26006	0.166778	0.119044	0.168	-1.06042	0.263681	6.16993e-05	0.1737	-0.1173	0.141	0.4055
5	33454328	rs78347783	A	G	TARS	0.176	0.260804	0.166923	0.118312	0.169	-1.07509	0.263252	4.74569e-05	0.174	-0.1223	0.141	0.3857
5	33845101	rs35147918	A	G	ADAMTS12	0.119	-0.0485609	0.198143	0.806414	0.129	1.1594	0.296148	9.592e-05	0.1221	0.325	0.1647	0.04846
5	33847457	rs4866392	A	G	ADAMTS12	0.12	-0.0403523	0.198111	0.838615	0.129	1.1594	0.296148	9.592e-05	0.1228	0.3306	0.1647	0.0447
5	33853102	rs13187545	A	G	ADAMTS12	0.119	-0.0347512	0.198757	0.861217	0.129	1.16454	0.293943	7.91222e-05	0.1221	0.3415	0.1646	0.03805
5	33859045	rs13153094	C	T	ADAMTS12	0.876	0.0191803	0.19402	0.921259	0.867	-1.1358	0.289739	9.39193e-05	0.8732	-0.3384	0.1612	0.03582
5	33885515	rs2113110	A	G	ADAMTS12	0.112	-0.160817	0.212143	0.448486	0.13	1.18595	0.30089	8.60316e-05	0.118	0.2864	0.1734	0.09861
5	33887419	rs4866399	A	G	ADAMTS12	0.112	-0.156221	0.212242	0.461765	0.13	1.18792	0.301335	8.57776e-05	0.118	0.2895	0.1735	0.09526
5	33889275	rs7378990	C	G	ADAMTS12	0.111	-0.112843	0.212286	0.595075	0.13	1.18792	0.301335	8.57776e-05	0.1173	0.3186	0.1735	0.06638
5	33889628	rs12654089	C	T	ADAMTS12	0.111	-0.112843	0.212286	0.595075	0.13	1.18792	0.301335	8.57776e-05	0.1173	0.3186	0.1735	0.06638
5	44940961	rs75047233	A	G		0.968	1.27808	0.370321	0.000566879	0.976	1.48112	0.660339	0.0250944	0.9699	1.3267	0.323	4.002e-05
5	44977373	rs78901044	C	T		0.031	-1.26243	0.37133	0.000684734	0.026	-1.40948	0.637841	0.0273246	0.0297	-1.2996	0.3209	5.124e-05
5	60343518	rs115204818	C	T	NDUFAF2	0.969	-1.1264	0.364826	0.00203991	0.972	-1.56827	0.592621	0.00825193	0.9698	-1.2478	0.3107	5.906e-05
5	66086741	rs114595777	A	G	MAST4	0.907	0.0341531	0.22728	0.880564	0.92	1.49875	0.361891	3.71211e-05	0.9107	0.4484	0.1925	0.01981
5	66088492	rs2888120	C	T	MAST4	0.095	-0.0743333	0.225671	0.741889	0.081	-1.47596	0.36054	4.55116e-05	0.0911	-0.4689	0.1913	0.01424
5	66088755	rs56733210	A	G	MAST4	0.09	0.0284245	0.232077	0.902529	0.078	-1.46589	0.372733	8.91461e-05	0.0866	-0.389	0.197	0.0483
5	66091337	rs78846590	G	T	MAST4	0.91	-0.0284245	0.232077	0.902529	0.923	1.47756	0.376044	9.04692e-05	0.9136	0.387	0.1975	0.05007
5	66092116	rs16895620	C	T	MAST4	0.911	0.0343971	0.232719	0.882508	0.923	1.5155	0.376662	6.12125e-05	0.9143	0.4436	0.198	0.02506
5	66096427	rs139465597	A	C	MAST4	0.911	0.0282384	0.232563	0.903366	0.923	1.55912	0.37574	3.58602e-05	0.9143	0.4523	0.1977	0.02219
5	66097162	rs116511629	G	T	MAST4	0.913	0.00233739	0.2342	0.992038	0.924	1.58495	0.377311	2.87422e-05	0.9161	0.4425	0.199	0.02616
5	66100196	rs16895636	C	T	MAST4	0.088	0.0281165	0.233616	0.904213	0.078	-1.57745	0.374853	2.78129e-05	0.0852	-0.421	0.1983	0.0337
5	66101660	rs1374041	A	G	MAST4	0.088	0.0281165	0.233616	0.904213	0.077	-1.58577	0.37553	2.61014e-05	0.0849	-0.4222	0.1984	0.03331
5	66102046	rs7725168	C	G	MAST4	0.912	-0.0281165	0.233616	0.904213	0.923	1.58577	0.37553	2.61014e-05	0.9151	0.4222	0.1984	0.03331
5	66102710	rs6871758	G	T	MAST4	0.088	0.0281165	0.233616	0.904213	0.077	-1.58577	0.37553	2.61014e-05	0.0849	-0.4222	0.1984	0.03331
5	66102842	rs6890895	C	T	MAST4	0.912	-0.0281165	0.233616	0.904213	0.923	1.58577	0.37553	2.61014e-05	0.9151	0.4222	0.1984	0.03331
5	66103026	rs6891269	C	T	MAST4	0.915	-0.0739538	0.237095	0.755129	0.925	1.52822	0.38019	6.2209e-05	0.9178	0.3747	0.2012	0.06255
5	66103050	rs6872303	C	T	MAST4	0.085	0.0739538	0.237095	0.755129	0.075	-1.52822	0.38019	6.2209e-05	0.0822	-0.3747	0.2012	0.06255
5	66103052	rs6891285	C	T	MAST4	0.915	-0.0739538	0.237095	0.755129	0.925	1.52822	0.38019	6.2209e-05	0.9178	0.3747	0.2012	0.06255
5	66103272	rs147063555	C	T	MAST4	0.088	0.0281165	0.233616	0.904213	0.077	-1.58577	0.37553	2.61014e-05	0.0849	-0.4222	0.1984	0.03331
5	66103364	rs115474639	C	T	MAST4	0.912	-0.0281165	0.233616	0.904213	0.923	1.58577	0.37553	2.61014e-05	0.9151	0.4222	0.1984	0.03331
5	66103924	rs75374956	C	T	MAST4	0.088	0.0281165	0.233616	0.904213	0.077	-1.58577	0.37553	2.61014e-05	0.0849	-0.4222	0.1984	0.03331
5	66105365	rs75701745	A	G	MAST4	0.914	-0.102235	0.234878	0.663403	0.924	1.65862	0.375307	1.08654e-05	0.9168	0.3933	0.1991	0.04821
5	66106941	rs74409946	A	C	MAST4	0.912	-0.0281165	0.233616	0.904213	0.923	1.62437	0.376265	1.72176e-05	0.9151	0.4317	0.1985	0.02964
5	66107651	rs78379752	A	T	MAST4	0.086	0.0728546	0.235499	0.75707	0.075	-1.63263	0.37876	1.77313e-05	0.0829	-0.4026	0.2	0.04408
5	66111539	rs80167130	A	G	MAST4	0.912	-0.0224486	0.232557	0.923107	0.923	1.58598	0.375835	2.64321e-05	0.915	0.4229	0.1978	0.03249
5	66118234	rs2008947	C	T	MAST4	0.087	0.0428647	0.233345	0.854266	0.077	-1.58598	0.375835	2.64321e-05	0.0842	-0.4103	0.1982	0.03847
5	66118309	rs737455	C	T	MAST4	0.087	0.0428647	0.233345	0.854266	0.077	-1.58598	0.375835	2.64321e-05	0.0842	-0.4103	0.1982	0.03847
5	66120221	rs77210207	A	C	MAST4	0.086	0.0570469	0.234096	0.80749	0.076	-1.64695	0.377073	1.37238e-05	0.0832	-0.417	0.1989	0.03602
5	66136888	rs115155918	C	T	MAST4	0.967	-0.441072	0.364001	0.225726	0.976	2.61361	0.649838	6.16116e-05	0.9691	0.2885	0.3176	0.3637
5	66700058	rs32016	C	T		0.421	-0.523764	0.13002	5.77986e-05	0.408	0.201807	0.20574	0.326864	0.4173	-0.3167	0.1099	0.00396
5	66701568	rs648088	C	T		0.421	-0.523764	0.13002	5.77986e-05	0.409	0.225515	0.205947	0.273745	0.4176	-0.3102	0.1099	0.004777
5	66704329	rs160975	C	G		0.587	0.517644	0.130078	7.09657e-05	0.607	-0.172816	0.207192	0.404414	0.5927	0.3224	0.1102	0.003424
5	72835055	rs10515156	C	G		0.921	-0.36063	0.239257	0.131858	0.931	-1.68825	0.399833	2.61423e-05	0.9236	-0.7107	0.2053	0.0005371
5	73610359	rs17557368	A	G		0.011	2.3357	0.594033	8.64827e-05	NA	NA	NA	NA	0.011	2.3357	0.594	8.427e-05
5	84255913	rs6865097	C	G		0.108	-0.839079	0.211064	7.21698e-05	0.111	0.01093	0.317749	0.972566	0.1089	-0.5789	0.1758	0.0009932
5	84272418	rs4560548	C	T		0.891	0.827357	0.209537	8.07447e-05	0.889	0.0911216	0.316022	0.773141	0.8904	0.6025	0.1746	0.0005602
5	84283613	rs73768937	C	T		0.108	-0.82748	0.210587	8.73944e-05	0.108	0.0011671	0.319538	0.997086	0.108	-0.5766	0.1758	0.001042
5	84290300	rs73768939	A	G		0.892	0.844948	0.211184	6.48515e-05	0.898	-0.0244983	0.331513	0.941104	0.8937	0.594	0.1781	0.0008537
5	84291567	rs73768943	A	G		0.108	-0.835006	0.21101	7.78833e-05	0.102	0.0244983	0.331513	0.941104	0.1063	-0.5872	0.178	0.0009716
5	84295921	rs73768945	A	G		0.108	-0.835006	0.21101	7.78833e-05	0.1	0.0443655	0.333139	0.89408	0.1057	-0.5832	0.1783	0.001069
5	84303446	rs60187955	C	G		0.893	0.837173	0.211896	7.99575e-05	0.899	-0.0856718	0.330339	0.795417	0.8947	0.5682	0.1784	0.001445
5	84306738	rs7719451	A	G		0.108	-0.834889	0.210887	7.73172e-05	0.102	0.0975551	0.329332	0.767117	0.1063	-0.5637	0.1776	0.001502
5	84307573	rs368402379	G	GCTTT		0.108	-0.834889	0.210887	7.73172e-05	0.102	0.0730586	0.329298	0.824462	0.1063	-0.5708	0.1776	0.001308
5	89613757	rs113894454	A	G		0.964	-0.188979	0.349565	0.588821	0.967	2.16262	0.551924	9.4593e-05	0.9649	0.4843	0.2953	0.101
5	89627552	rs74846160	A	C		0.036	0.289598	0.348668	0.406285	0.033	-2.38212	0.550781	1.66217e-05	0.0351	-0.4748	0.2946	0.1071
5	97328255	rs166287	A	G		0.709	0.573856	0.141723	5.29203e-05	0.742	0.0675912	0.22585	0.764786	0.7183	0.4308	0.12	0.0003321
5	97332129	rs257236	C	G		0.722	0.575074	0.14344	6.26615e-05	0.753	-0.0514908	0.228156	0.82149	0.7308	0.3976	0.1214	0.00106
5	105066930	rs76788589	A	G		0.959	-1.28096	0.321937	7.11389e-05	NA	NA	NA	NA	0.959	-1.281	0.3219	6.923e-05
5	115926655	rs78963752	C	T		0.222	-0.617719	0.158346	9.82071e-05	0.211	-0.0177089	0.244719	0.942325	0.2188	-0.4406	0.1329	0.0009179
5	115927022	rs78442494	C	T		0.222	-0.617719	0.158346	9.82071e-05	0.212	-0.00187209	0.244742	0.993898	0.219	-0.436	0.1329	0.00104
5	115927342	rs60087194	C	T		0.224	-0.623108	0.15813	8.34758e-05	0.212	-0.011466	0.244664	0.96263	0.2205	-0.4429	0.1328	0.0008534
5	115927468	rs58080654	G	T		0.221	-0.645846	0.158843	4.92689e-05	0.211	-0.0613894	0.245452	0.80255	0.218	-0.4733	0.1334	0.0003861
5	115927945	rs78185554	G	T		0.778	0.619896	0.158487	9.41504e-05	0.788	0.00187209	0.244742	0.993898	0.781	0.4373	0.133	0.001012
5	115927965	rs75909765	C	T		0.781	0.646056	0.159029	4.99975e-05	0.789	0.0517531	0.245534	0.8331	0.7834	0.4704	0.1335	0.0004245
5	120956631	rs28673928	C	T		0.845	-0.602149	0.17345	0.000525867	0.84	-0.621485	0.264913	0.0191507	0.8435	-0.608	0.1451	2.796e-05
5	122859768	rs76746238	C	T	CSNK1G3	0.977	0.147953	0.433905	0.733146	0.984	-3.0634	0.777221	8.60247e-05	0.9787	-0.6151	0.3789	0.1045
5	136795725	rs12521571	A	G	SPOCK1	0.205	0.524261	0.158649	0.000964317	0.223	0.501639	0.231842	0.0306983	0.2107	0.517	0.1309	7.845e-05
5	136799439	rs7727607	C	T	SPOCK1	0.795	-0.516611	0.15871	0.00114832	0.777	-0.514567	0.231756	0.0265989	0.7893	-0.516	0.1309	8.142e-05
5	136799480	rs7710048	C	T	SPOCK1	0.205	0.516611	0.15871	0.00114832	0.223	0.514567	0.231756	0.0265989	0.2107	0.516	0.1309	8.142e-05
5	136833282	rs7730850	A	T	SPOCK1	0.207	0.523883	0.156421	0.000822155	0.223	0.493892	0.232559	0.0339125	0.212	0.5145	0.1298	7.361e-05
5	136836245	rs11743751	C	T	SPOCK1	0.067	0.724172	0.257079	0.00488551	0.081	1.03441	0.364271	0.00459804	0.0717	0.8273	0.21	8.187e-05
5	137232180	rs566694612	A	G	PKD2L2	0.014	-2.273	0.540325	2.67923e-05	0.015	0.406153	0.797552	0.610679	0.0143	-1.4302	0.4473	0.001388
5	137276132	rs10070991	A	T	PKD2L2	0.014	-2.26481	0.544121	3.2533e-05	0.015	0.406153	0.797552	0.610679	0.0143	-1.4165	0.4495	0.001625
5	137315835	rs569354471	C	T	FAM13B	0.986	2.26481	0.544121	3.2533e-05	0.985	-0.406153	0.797552	0.610679	0.9857	1.4165	0.4495	0.001625
5	137335982	rs9327803	A	T	FAM13B	0.014	-2.26481	0.544121	3.2533e-05	0.015	0.406153	0.797552	0.610679	0.0143	-1.4165	0.4495	0.001625
5	137341092	rs10045288	A	T	FAM13B	0.986	2.26481	0.544121	3.2533e-05	0.985	-0.406153	0.797552	0.610679	0.9857	1.4165	0.4495	0.001625
5	137365968	rs188858679	C	T	FAM13B	0.987	2.21423	0.554615	6.72368e-05	0.985	-0.406153	0.797552	0.610679	0.9863	1.3601	0.4553	0.002817
5	137441641	rs33964479	A	AC		0.97	1.45809	0.371689	8.97802e-05	0.971	-0.344332	0.591949	0.560893	0.9703	0.9484	0.3148	0.002587
5	137655691	rs28826990	C	T	CDC25C	0.016	-2.1006	0.507192	3.55927e-05	0.019	0.402435	0.724694	0.578789	0.017	-1.2777	0.4155	0.002107
5	137668816	rs11567951	C	T	CDC25C	0.016	-2.11318	0.504246	2.87361e-05	0.019	0.402435	0.724694	0.578789	0.017	-1.2926	0.4139	0.001791
5	140878374	rs113587634	C	T	PCDHGA1	0.979	-1.83994	0.449484	4.38051e-05	0.984	-1.15715	0.79595	0.146284	0.9802	-1.6748	0.3914	1.875e-05
5	148237385	rs57108954	C	T		0.094	-1.01873	0.219123	3.50095e-06	NA	NA	NA	NA	0.094	-1.0187	0.2191	3.333e-06
5	148238991	rs73798430	A	T		0.058	-1.17301	0.270714	1.52713e-05	NA	NA	NA	NA	0.058	-1.173	0.2707	1.471e-05
5	148554400	rs184159979	C	G	ABLIM3	0.982	1.85871	0.477282	0.000100959	NA	NA	NA	NA	0.982	1.8587	0.4773	9.846e-05
5	148614215	rs150685616	C	T	ABLIM3	0.984	1.98697	0.504569	8.43567e-05	NA	NA	NA	NA	0.984	1.987	0.5046	8.218e-05
5	149044990	rs6881425	C	T		0.852	-0.304266	0.180063	0.0911924	0.836	1.09214	0.273413	6.90901e-05	0.8472	0.1182	0.1504	0.432
5	154482118	rs6870353	A	G		0.733	0.310266	0.145371	0.0329115	0.743	-0.885977	0.226196	9.51693e-05	0.7359	-0.0394	0.1223	0.7473
5	154501499	rs10072262	A	G		0.222	-0.406042	0.153803	0.00834014	0.214	1.01073	0.241732	3.12736e-05	0.2197	0.0022	0.1298	0.9863
5	154501517	rs10072166	A	C		0.222	-0.406042	0.153803	0.00834014	0.215	1.03494	0.241621	2.00013e-05	0.22	0.0095	0.1297	0.9418
5	154501529	rs10057101	A	G		0.778	0.406042	0.153803	0.00834014	0.785	-1.03494	0.241621	2.00013e-05	0.78	-0.0095	0.1297	0.9418
5	154501589	rs6879364	A	G		0.222	-0.406042	0.153803	0.00834014	0.215	1.03494	0.241621	2.00013e-05	0.22	0.0095	0.1297	0.9418
5	154501909	rs6860537	C	T		0.222	-0.406042	0.153803	0.00834014	0.215	1.03494	0.241621	2.00013e-05	0.22	0.0095	0.1297	0.9418
5	154502138	rs74891496	G	T		0.802	0.458188	0.159615	0.00413058	0.812	-1.12862	0.252979	8.9718e-06	0.8048	0.0064	0.135	0.9624
5	154502162	rs9765218	A	G		0.198	-0.458188	0.159615	0.00413058	0.188	1.12862	0.252979	8.9718e-06	0.1952	-0.0064	0.135	0.9624
5	154504661	rs6896130	A	G		0.758	0.420009	0.149168	0.00490432	0.766	-0.958806	0.235112	4.864e-05	0.7603	0.0243	0.126	0.8471
5	154504680	rs6877351	C	T		0.242	-0.421561	0.149004	0.00470257	0.234	0.958806	0.235112	4.864e-05	0.2397	-0.026	0.1259	0.8363
5	167004179	rs12515062	C	T	TENM2	0.944	1.09571	0.272164	5.83853e-05	NA	NA	NA	NA	0.944	1.0957	0.2722	5.675e-05
5	167944542	rs17552419	C	T	RARS	0.935	-1.0266	0.264348	0.000105539	0.943	-0.501555	0.420506	0.233225	0.9373	-0.8779	0.2238	8.759e-05
5	169041919		C	CAAAAA		0.409	0.508173	0.129485	8.91551e-05	0.399	0.191092	0.199999	0.339549	0.406	0.4145	0.1087	0.0001369
5	169817759	rs314130	A	C	KCNIP1	0.187	-0.698844	0.163343	1.95113e-05	NA	NA	NA	NA	0.187	-0.6988	0.1633	1.883e-05
5	170007503	rs11134638	A	G	KCNIP1	0.869	-0.752871	0.198045	0.00014714	0.869	-0.402871	0.29406	0.170954	0.869	-0.6437	0.1643	8.914e-05
5	173428746	rs77582279	G	T	C5orf47	0.068	-1.06003	0.25552	3.45436e-05	0.049	0.00683268	0.448989	0.987861	0.0634	-0.799	0.2221	0.0003207
5	173443847	rs565405000	A	G		0.067	-1.03842	0.255983	5.12654e-05	NA	NA	NA	NA	0.067	-1.0384	0.256	4.979e-05
5	173444200	rs184436573	A	G		0.067	-1.03842	0.255983	5.12654e-05	NA	NA	NA	NA	0.067	-1.0384	0.256	4.979e-05
5	173449200	rs79888897	A	G		0.933	1.02058	0.25605	6.91038e-05	NA	NA	NA	NA	0.933	1.0206	0.256	6.724e-05
5	173449365	rs78010469	A	T		0.067	-1.02058	0.25605	6.91038e-05	NA	NA	NA	NA	0.067	-1.0206	0.256	6.724e-05
5	173455503	rs145845166	C	CT		0.934	1.0653	0.25777	3.69859e-05	NA	NA	NA	NA	0.934	1.0653	0.2578	3.584e-05
5	173471721	rs74814403	A	G		0.934	1.07529	0.258029	3.18317e-05	NA	NA	NA	NA	0.934	1.0753	0.258	3.082e-05
5	173478262	rs116692683	C	T	NSG2	0.066	-1.07321	0.258381	3.37912e-05	NA	NA	NA	NA	0.066	-1.0732	0.2584	3.273e-05
5	173481981	rs17076789	A	G	NSG2	0.937	1.14932	0.263634	1.35458e-05	NA	NA	NA	NA	0.937	1.1493	0.2636	1.304e-05
5	173497394	rs78522839	A	T	NSG2	0.066	-1.06462	0.258535	3.94378e-05	NA	NA	NA	NA	0.066	-1.0646	0.2585	3.824e-05
5	173503088	rs75827090	G	T	NSG2	0.066	-1.04418	0.258396	5.47759e-05	NA	NA	NA	NA	0.066	-1.0442	0.2584	5.322e-05
5	173505250	rs78130476	A	G	NSG2	0.065	-1.08689	0.258144	2.63668e-05	NA	NA	NA	NA	0.065	-1.0869	0.2581	2.549e-05
5	173507532	rs113604049	C	T	NSG2	0.898	0.822325	0.209819	9.11446e-05	NA	NA	NA	NA	0.898	0.8223	0.2098	8.884e-05
5	173509931	rs17076810	A	G	NSG2	0.065	-1.09794	0.258446	2.23091e-05	NA	NA	NA	NA	0.065	-1.0979	0.2584	2.155e-05
5	173511739	rs78903635	C	G	NSG2	0.084	-0.897323	0.230413	0.000100933	NA	NA	NA	NA	0.084	-0.8973	0.2304	9.844e-05
5	173513721	rs76362767	C	T	NSG2	0.914	0.899835	0.2296	9.11723e-05	NA	NA	NA	NA	0.914	0.8998	0.2296	8.886e-05
5	173514073	rs17076831	C	T	NSG2	0.086	-0.899835	0.2296	9.11723e-05	NA	NA	NA	NA	0.086	-0.8998	0.2296	8.886e-05
5	173524682	rs374485111	C	CTCTG	NSG2	0.067	-1.02834	0.255585	5.89906e-05	NA	NA	NA	NA	0.067	-1.0283	0.2556	5.734e-05
6	450364	rs115100906	A	G		0.014	-1.96481	0.55211	0.00037938	0.013	-1.51047	0.869917	0.0827815	0.0137	-1.8343	0.4662	8.317e-05
6	9776194	rs9370818	A	G	OFCC1	0.87	0.037755	0.192106	0.844209	0.861	-1.15049	0.288849	7.24634e-05	0.8672	-0.3266	0.16	0.04114
6	10722466	rs73438131	A	G		0.275	-0.529593	0.145928	0.000289886	0.224	-0.380049	0.234941	0.106024	0.2608	-0.488	0.124	8.272e-05
6	12209121	rs370464296	T	TCTGA		0.26	0.400112	0.143687	0.00539844	0.264	0.682178	0.223425	0.00231727	0.2612	0.4826	0.1209	6.507e-05
6	19600521	rs2743618	A	C		0.108	-0.699885	0.21697	0.00127226	0.147	-0.656709	0.293242	0.0253217	0.1218	-0.6846	0.1744	8.669e-05
6	19607514	rs139140321	A	ATAACT		0.456	-0.35441	0.128564	0.00588027	0.464	-0.591113	0.196051	0.00262713	0.4584	-0.4256	0.1075	7.538e-05
6	19679445	rs150204406	C	T		0.026	1.62461	0.403604	5.85512e-05	NA	NA	NA	NA	0.026	1.6246	0.4036	5.691e-05
6	19700166	rs6940685	C	T		0.531	0.549884	0.127095	1.57221e-05	NA	NA	NA	NA	0.531	0.5499	0.1271	1.515e-05
6	19738006	rs11351826	T	TA		0.232	0.589479	0.150723	9.42833e-05	0.213	0.422473	0.240822	0.0796545	0.2267	0.5425	0.1278	2.177e-05
6	20373583	rs6912430	C	T		0.832	0.238183	0.173734	0.170504	0.819	1.04559	0.253943	4.11468e-05	0.8279	0.4956	0.1434	0.0005475
6	20373773	rs6937213	A	G		0.169	-0.241804	0.17363	0.163848	0.181	-1.04559	0.253943	4.11468e-05	0.1728	-0.4979	0.1433	0.0005136
6	20382600	rs1570155	A	G		0.827	0.174326	0.172731	0.312956	0.812	0.996073	0.252929	8.7213e-05	0.8222	0.4357	0.1426	0.002255
6	20382747	rs1004255	A	G		0.173	-0.174326	0.172731	0.312956	0.188	-0.996073	0.252929	8.7213e-05	0.1778	-0.4357	0.1426	0.002255
6	20385672	rs1853151	G	T		0.173	-0.174326	0.172731	0.312956	0.188	-0.996073	0.252929	8.7213e-05	0.1778	-0.4357	0.1426	0.002255
6	20391323	rs6456347	A	C		0.83	0.186682	0.173907	0.283167	0.812	1.003	0.252877	7.76472e-05	0.8242	0.4488	0.1433	0.001736
6	21835656	rs34061913	G	GT		0.934	-0.758498	0.260776	0.00366126	0.949	-1.3758	0.446358	0.00210465	0.9378	-0.9156	0.2252	4.777e-05
6	23916659	rs74486495	C	T		0.976	-1.48852	0.422133	0.000428934	0.976	-1.37765	0.654471	0.0355158	0.976	-1.4559	0.3547	4.057e-05
6	23918419	rs555072898	G	GT		0.024	1.58126	0.422152	0.000183818	0.023	1.37941	0.666081	0.0385947	0.0237	1.5234	0.3566	1.934e-05
6	23925051		A	G		0.976	-1.50162	0.42216	0.000381877	0.975	-1.09178	0.648471	0.0925339	0.9757	-1.3796	0.3538	9.638e-05
6	23925821	rs111335684	G	T		0.977	-1.47283	0.427432	0.000578557	0.975	-1.20177	0.648276	0.0640332	0.9764	-1.3907	0.3568	9.732e-05
6	23964851		A	G		0.302	-0.557007	0.140364	7.43611e-05	NA	NA	NA	NA	0.302	-0.557	0.1404	7.239e-05
6	25454869	rs9356977	A	C	LRRC16A	0.68	0.132098	0.135423	0.329428	0.715	0.83391	0.213045	9.61903e-05	0.6901	0.3341	0.1143	0.003467
6	25462824	rs4320355	C	T	LRRC16A	0.796	0.0281703	0.161804	0.8618	0.8	1.01965	0.242652	2.85575e-05	0.7972	0.3333	0.1346	0.01328
6	25464492	rs301397	C	T	LRRC16A	0.742	0.0464431	0.146959	0.752007	0.754	0.941789	0.223955	2.81699e-05	0.7456	0.3159	0.1229	0.01013
6	26467089	rs72500819	A	G	BTN2A1	0.944	1.12783	0.282874	6.87551e-05	0.948	0.426616	0.448873	0.342106	0.9451	0.9285	0.2393	0.0001045
6	26469096	rs114011167	C	T	BTN2A1	0.945	1.14424	0.283243	5.50628e-05	0.948	0.426616	0.448873	0.342106	0.9459	0.9399	0.2395	8.722e-05
6	26483645	rs150398438	G	GCA		0.055	-1.12291	0.283483	7.66239e-05	0.052	-0.426616	0.448873	0.342106	0.0541	-0.9244	0.2397	0.000115
6	26496418	rs140975320	A	G		0.944	1.13282	0.282612	6.28603e-05	0.948	0.510061	0.449123	0.256333	0.9451	0.9562	0.2392	6.402e-05
6	30383442	rs4713325	C	G		0.716	0.578417	0.147402	8.93386e-05	0.73	0.13213	0.222786	0.553248	0.7203	0.4425	0.1229	0.0003184
6	30383637	rs4713326	C	G		0.284	-0.578417	0.147402	8.93386e-05	0.27	-0.13213	0.222786	0.553248	0.2797	-0.4425	0.1229	0.0003184
6	30384322	rs2074502	A	G		0.284	-0.578417	0.147402	8.93386e-05	0.27	-0.14926	0.222833	0.503106	0.2797	-0.4478	0.1229	0.0002701
6	30384831	rs17188729	A	G		0.283	-0.577009	0.147402	9.29292e-05	0.27	-0.116478	0.222314	0.600429	0.279	-0.4364	0.1229	0.0003822
6	30385057	rs17195089	A	G		0.286	-0.574773	0.14381	6.60158e-05	0.269	-0.17621	0.222848	0.429276	0.281	-0.4576	0.1208	0.0001525
6	30542610	rs78094121	A	T	ABCF1	0.895	0.799589	0.21804	0.000250212	0.9	0.696	0.332067	0.0363107	0.8965	0.7684	0.1823	2.489e-05
6	30542871	rs370829193	C	CAG	ABCF1	0.895	0.791907	0.217868	0.000283628	0.9	0.696	0.332067	0.0363107	0.8965	0.763	0.1822	2.804e-05
6	30544461	rs77594175	A	G	ABCF1	0.105	-0.799589	0.21804	0.000250212	0.1	-0.696	0.332067	0.0363107	0.1035	-0.7684	0.1823	2.489e-05
6	30553869	rs17195453	C	T	ABCF1	0.895	0.799589	0.21804	0.000250212	0.9	0.696	0.332067	0.0363107	0.8965	0.7684	0.1823	2.489e-05
6	30559034	rs9671	C	T	ABCF1	0.105	-0.799589	0.21804	0.000250212	0.101	-0.719984	0.331866	0.0302556	0.1038	-0.7756	0.1822	2.08e-05
6	30559863	rs6899769	C	T	ABCF1	0.895	0.799589	0.21804	0.000250212	0.9	0.717007	0.332597	0.031314	0.8965	0.7748	0.1823	2.149e-05
6	30560155	rs4148253	C	CT	ABCF1	0.895	0.799589	0.21804	0.000250212	0.9	0.717007	0.332597	0.031314	0.8965	0.7748	0.1823	2.149e-05
6	30560597	rs75998499	C	T	ABCF1	0.895	0.799589	0.21804	0.000250212	0.9	0.717007	0.332597	0.031314	0.8965	0.7748	0.1823	2.149e-05
6	30560876	rs114648979	A	G	ABCF1	0.105	-0.799589	0.21804	0.000250212	0.1	-0.717007	0.332597	0.031314	0.1035	-0.7748	0.1823	2.149e-05
6	30561466	rs112233902	C	T	ABCF1	0.9	0.735341	0.22346	0.00101278	0.902	0.824934	0.335931	0.0142143	0.9006	0.7628	0.1861	4.132e-05
6	30561724	rs7749109	A	G	ABCF1	0.895	0.799589	0.21804	0.000250212	0.9	0.717007	0.332597	0.031314	0.8965	0.7748	0.1823	2.149e-05
6	30561905	rs7749807	A	G	ABCF1	0.105	-0.799589	0.21804	0.000250212	0.1	-0.717007	0.332597	0.031314	0.1035	-0.7748	0.1823	2.149e-05
6	30562041	rs7749978	A	G	ABCF1	0.105	-0.799589	0.21804	0.000250212	0.1	-0.717007	0.332597	0.031314	0.1035	-0.7748	0.1823	2.149e-05
6	30562647	rs6917434	A	G	ABCF1	0.895	0.799589	0.21804	0.000250212	0.9	0.717007	0.332597	0.031314	0.8965	0.7748	0.1823	2.149e-05
6	30563362	rs17189120	A	C	ABCF1	0.895	0.799589	0.21804	0.000250212	0.9	0.717007	0.332597	0.031314	0.8965	0.7748	0.1823	2.149e-05
6	30563608	rs6934466	C	T	ABCF1	0.895	0.799589	0.21804	0.000250212	0.9	0.717007	0.332597	0.031314	0.8965	0.7748	0.1823	2.149e-05
6	30564344	rs115626650	A	T	ABCF1	0.9	0.735341	0.22346	0.00101278	0.902	0.815347	0.336594	0.0155795	0.9006	0.7598	0.1862	4.478e-05
6	30564580	rs143891369	C	T	ABCF1	0.895	0.799589	0.21804	0.000250212	0.901	0.707162	0.333224	0.0340424	0.8968	0.7719	0.1825	2.331e-05
6	30564880	rs150900438	A	G	ABCF1	0.105	-0.799589	0.21804	0.000250212	0.099	-0.707162	0.333224	0.0340424	0.1032	-0.7719	0.1825	2.331e-05
6	30564924	rs78838891	C	T	ABCF1	0.105	-0.799589	0.21804	0.000250212	0.099	-0.707162	0.333224	0.0340424	0.1032	-0.7719	0.1825	2.331e-05
6	30565386	rs113784283	A	G		0.105	-0.799589	0.21804	0.000250212	0.1	-0.672075	0.332471	0.0434712	0.1035	-0.7612	0.1823	2.979e-05
6	30565938	rs149080765	C	T		0.895	0.799589	0.21804	0.000250212	0.901	0.707162	0.333224	0.0340424	0.8968	0.7719	0.1825	2.331e-05
6	30566154	rs7742754	A	G		0.895	0.799589	0.21804	0.000250212	0.901	0.707162	0.333224	0.0340424	0.8968	0.7719	0.1825	2.331e-05
6	30566254		A	G		0.105	-0.799589	0.21804	0.000250212	0.099	-0.707162	0.333224	0.0340424	0.1032	-0.7719	0.1825	2.331e-05
6	30566472	rs6457247	A	G		0.105	-0.799589	0.21804	0.000250212	0.099	-0.707162	0.333224	0.0340424	0.1032	-0.7719	0.1825	2.331e-05
6	30567332	rs116424864	G	T		0.105	-0.799589	0.21804	0.000250212	0.099	-0.707162	0.333224	0.0340424	0.1032	-0.7719	0.1825	2.331e-05
6	30567357	rs112643323	C	T		0.105	-0.799589	0.21804	0.000250212	0.099	-0.707162	0.333224	0.0340424	0.1032	-0.7719	0.1825	2.331e-05
6	30570480		C	G	PPP1R10	0.895	0.814656	0.218131	0.000191991	0.901	0.707162	0.333224	0.0340424	0.8968	0.7824	0.1825	1.81e-05
6	30571197	rs17195474	A	C	PPP1R10	0.105	-0.814656	0.218131	0.000191991	0.099	-0.707162	0.333224	0.0340424	0.1032	-0.7824	0.1825	1.81e-05
6	30573139	rs7742291	A	C	PPP1R10	0.895	0.814656	0.218131	0.000191991	0.901	0.707162	0.333224	0.0340424	0.8968	0.7824	0.1825	1.81e-05
6	30573334	rs7742650	A	G	PPP1R10	0.895	0.814656	0.218131	0.000191991	0.901	0.707162	0.333224	0.0340424	0.8968	0.7824	0.1825	1.81e-05
6	30573430	rs17195488	A	G	PPP1R10	0.895	0.814656	0.218131	0.000191991	0.901	0.707162	0.333224	0.0340424	0.8968	0.7824	0.1825	1.81e-05
6	30573497	rs17195495	C	T	PPP1R10	0.911	0.824066	0.233047	0.000413297	0.911	0.697392	0.349813	0.0464374	0.911	0.7851	0.1939	5.163e-05
6	30573562	rs17189155	A	G	PPP1R10	0.105	-0.814656	0.218131	0.000191991	0.099	-0.680492	0.333652	0.0416333	0.1032	-0.7745	0.1826	2.215e-05
6	30573866	rs6457248	C	T	PPP1R10	0.105	-0.814656	0.218131	0.000191991	0.099	-0.707162	0.333224	0.0340424	0.1032	-0.7824	0.1825	1.81e-05
6	30574100	rs374509432	G	GTTC	PPP1R10	0.105	-0.814656	0.218131	0.000191991	0.099	-0.707162	0.333224	0.0340424	0.1032	-0.7824	0.1825	1.81e-05
6	30574737	rs76442448	A	G	PPP1R10	0.105	-0.814656	0.218131	0.000191991	0.099	-0.707162	0.333224	0.0340424	0.1032	-0.7824	0.1825	1.81e-05
6	30575058		C	T	PPP1R10	0.895	0.814656	0.218131	0.000191991	0.901	0.707162	0.333224	0.0340424	0.8968	0.7824	0.1825	1.81e-05
6	30575922	rs113681826	C	T	PPP1R10	0.895	0.817216	0.218011	0.00018179	0.901	0.707162	0.333224	0.0340424	0.8968	0.7842	0.1824	1.718e-05
6	30576155	rs58525263	A	T	PPP1R10	0.895	0.817216	0.218011	0.00018179	0.901	0.707162	0.333224	0.0340424	0.8968	0.7842	0.1824	1.718e-05
6	30576156	rs57626358	A	G	PPP1R10	0.895	0.817216	0.218011	0.00018179	0.901	0.707162	0.333224	0.0340424	0.8968	0.7842	0.1824	1.718e-05
6	30576166	rs60365864	C	T	PPP1R10	0.895	0.817216	0.218011	0.00018179	0.901	0.707162	0.333224	0.0340424	0.8968	0.7842	0.1824	1.718e-05
6	30577172		C	G	PPP1R10	0.105	-0.817216	0.218011	0.00018179	0.099	-0.707162	0.333224	0.0340424	0.1032	-0.7842	0.1824	1.718e-05
6	30577593	rs6901251	A	C	PPP1R10	0.895	0.817216	0.218011	0.00018179	0.901	0.707162	0.333224	0.0340424	0.8968	0.7842	0.1824	1.718e-05
6	30577792	rs2239514	A	G	PPP1R10	0.105	-0.817216	0.218011	0.00018179	0.099	-0.707162	0.333224	0.0340424	0.1032	-0.7842	0.1824	1.718e-05
6	30577966	rs2239515	C	T	PPP1R10	0.895	0.817216	0.218011	0.00018179	0.901	0.707162	0.333224	0.0340424	0.8968	0.7842	0.1824	1.718e-05
6	30578048	rs2239516	C	T	PPP1R10	0.105	-0.817216	0.218011	0.00018179	0.099	-0.68025	0.33384	0.0418204	0.1032	-0.7763	0.1825	2.112e-05
6	30578101	rs112752999	C	T	PPP1R10	0.895	0.817216	0.218011	0.00018179	0.901	0.707162	0.333224	0.0340424	0.8968	0.7842	0.1824	1.718e-05
6	30578543		C	T	PPP1R10	0.895	0.817216	0.218011	0.00018179	0.901	0.707162	0.333224	0.0340424	0.8968	0.7842	0.1824	1.718e-05
6	30579088	rs375291083	A	AAAAC	PPP1R10	0.909	0.835984	0.230981	0.000301107	0.911	0.742114	0.349109	0.0337446	0.9096	0.8074	0.1926	2.773e-05
6	30579417	rs7767002	C	T	PPP1R10	0.105	-0.817216	0.218011	0.00018179	0.099	-0.707162	0.333224	0.0340424	0.1032	-0.7842	0.1824	1.718e-05
6	30579556	rs6457249	A	G	PPP1R10	0.895	0.817216	0.218011	0.00018179	0.901	0.707162	0.333224	0.0340424	0.8968	0.7842	0.1824	1.718e-05
6	30580085	rs17195516	C	T	PPP1R10	0.895	0.817216	0.218011	0.00018179	0.901	0.707162	0.333224	0.0340424	0.8968	0.7842	0.1824	1.718e-05
6	30580615	rs59272830	A	G	PPP1R10	0.105	-0.817216	0.218011	0.00018179	0.099	-0.707162	0.333224	0.0340424	0.1032	-0.7842	0.1824	1.718e-05
6	30580626	rs2267638	A	C	PPP1R10	0.105	-0.817216	0.218011	0.00018179	0.099	-0.707162	0.333224	0.0340424	0.1032	-0.7842	0.1824	1.718e-05
6	30580893	rs2267640	C	T	PPP1R10	0.105	-0.817216	0.218011	0.00018179	0.099	-0.707162	0.333224	0.0340424	0.1032	-0.7842	0.1824	1.718e-05
6	30581241	rs59913575	A	T	PPP1R10	0.895	0.817216	0.218011	0.00018179	0.901	0.707162	0.333224	0.0340424	0.8968	0.7842	0.1824	1.718e-05
6	30581341	rs367572030	A	ATACAT	PPP1R10	0.895	0.817216	0.218011	0.00018179	0.901	0.707162	0.333224	0.0340424	0.8968	0.7842	0.1824	1.718e-05
6	30581658	rs371809531	C	CA	PPP1R10	0.895	0.812379	0.218294	0.000202271	0.902	0.73608	0.335478	0.0284325	0.8971	0.7897	0.183	1.589e-05
6	30582078	rs115514325	A	G	PPP1R10	0.895	0.817216	0.218011	0.00018179	0.901	0.707162	0.333224	0.0340424	0.8968	0.7842	0.1824	1.718e-05
6	30585333	rs16867845	G	T	PPP1R10	0.105	-0.816498	0.217419	0.000176876	0.099	-0.707162	0.333224	0.0340424	0.1032	-0.7839	0.1821	1.671e-05
6	30586694	rs375000088	A	AT	MRPS18B	0.895	0.816498	0.217419	0.000176876	0.901	0.707162	0.333224	0.0340424	0.8968	0.7839	0.1821	1.671e-05
6	30587613	rs2302347	C	T	MRPS18B	0.895	0.816498	0.217419	0.000176876	0.901	0.707162	0.333224	0.0340424	0.8968	0.7839	0.1821	1.671e-05
6	30588356	rs75299979	C	T	MRPS18B	0.105	-0.816498	0.217419	0.000176876	0.099	-0.707162	0.333224	0.0340424	0.1032	-0.7839	0.1821	1.671e-05
6	30589094	rs183138129	G	T	MRPS18B	0.895	0.816498	0.217419	0.000176876	0.901	0.707162	0.333224	0.0340424	0.8968	0.7839	0.1821	1.671e-05
6	30589095	rs187595468	C	T	MRPS18B	0.895	0.816498	0.217419	0.000176876	0.901	0.707162	0.333224	0.0340424	0.8968	0.7839	0.1821	1.671e-05
6	30589223	rs113968136	C	T	MRPS18B	0.895	0.816498	0.217419	0.000176876	0.901	0.707162	0.333224	0.0340424	0.8968	0.7839	0.1821	1.671e-05
6	30591866		G	T	MRPS18B	0.888	0.81221	0.212042	0.000130972	0.897	0.6494	0.330146	0.0494303	0.8906	0.7647	0.1784	1.82e-05
6	30591949	rs148094252	A	C	MRPS18B	0.112	-0.81221	0.212042	0.000130972	0.103	-0.6494	0.330146	0.0494303	0.1094	-0.7647	0.1784	1.82e-05
6	30592414	rs2270172	C	T	MRPS18B	0.112	-0.804791	0.211487	0.000144873	0.104	-0.629019	0.329638	0.0566208	0.1097	-0.7535	0.178	2.303e-05
6	30593075	rs6917935	A	G	MRPS18B	0.895	0.81188	0.217559	0.000194239	0.901	0.685421	0.335354	0.0412007	0.8968	0.7744	0.1825	2.205e-05
6	30593485		C	G	MRPS18B	0.895	0.81188	0.217559	0.000194239	0.901	0.685421	0.335354	0.0412007	0.8968	0.7744	0.1825	2.205e-05
6	30593982	rs75407659	A	G	MRPS18B	0.105	-0.81188	0.217559	0.000194239	0.099	-0.685421	0.335354	0.0412007	0.1032	-0.7744	0.1825	2.205e-05
6	30596135	rs6904236	A	G	ATAT1	0.896	0.813093	0.218187	0.000198254	0.902	0.701126	0.33632	0.0373238	0.8978	0.7799	0.183	2.036e-05
6	30596496	rs6927727	C	T	ATAT1	0.111	-0.813292	0.212615	0.000133766	0.102	-0.664311	0.331031	0.0450131	0.1084	-0.7698	0.1789	1.685e-05
6	30597522	rs6911174	C	T	ATAT1	0.896	0.813093	0.218187	0.000198254	0.902	0.701126	0.33632	0.0373238	0.8978	0.7799	0.183	2.036e-05
6	30598701	rs112692883	C	T	ATAT1	0.883	0.753288	0.20585	0.000257867	0.893	0.548901	0.322197	0.0887308	0.8859	0.694	0.1735	6.308e-05
6	30599402	rs2394387	A	T	ATAT1	0.896	0.813093	0.218187	0.000198254	0.902	0.701126	0.33632	0.0373238	0.8978	0.7799	0.183	2.036e-05
6	30601281	rs17195544	C	T	ATAT1	0.108	-0.761201	0.216059	0.000433899	0.103	-0.735295	0.331899	0.0269331	0.1065	-0.7535	0.1811	3.165e-05
6	40219631	rs60081774	C	CAACCGTAAAGTGA		0.044	-0.113655	0.314933	0.718214	0.042	-1.96786	0.491426	6.63009e-05	0.0434	-0.6535	0.2652	0.01372
6	42413095	rs76720213	C	CACAG	TRERF1	0.575	-0.54165	0.131968	4.17909e-05	0.54	-0.10805	0.195627	0.580835	0.5641	-0.406	0.1094	0.0002061
6	42423253	rs9394900	G	T		0.423	0.59915	0.131527	5.47278e-06	0.437	-0.00535181	0.200615	0.978722	0.4272	0.4174	0.11	0.0001477
6	42426075	rs9367144	A	G		0.601	-0.527316	0.134354	8.90574e-05	0.578	-0.0464807	0.199965	0.816236	0.5938	-0.3778	0.1115	0.0007055
6	42430290	rs4714611	A	C		0.404	0.528206	0.133595	7.89911e-05	0.43	0.0211635	0.199208	0.915412	0.4121	0.3709	0.111	0.0008291
6	42430820	rs9462804	C	T		0.404	0.528206	0.133595	7.89911e-05	0.43	0.0211635	0.199208	0.915412	0.4121	0.3709	0.111	0.0008291
6	42437175	rs6928529	G	T		0.406	0.528266	0.133076	7.39384e-05	0.431	0.0144799	0.199608	0.942184	0.4137	0.3702	0.1107	0.0008283
6	42440358	rs4714612	C	T		0.408	0.546022	0.133024	4.17413e-05	NA	NA	NA	NA	0.408	0.546	0.133	4.049e-05
6	42447008	rs9349233	C	T		0.597	-0.541357	0.1325	4.52776e-05	0.571	0.00680746	0.200602	0.972935	0.5891	-0.3749	0.1106	0.0006977
6	65246099	rs116767738	C	T	EYS	0.033	-1.72693	0.366017	2.50674e-06	0.038	0.464389	0.520269	0.372267	0.0347	-1.0014	0.2994	0.000822
6	65401076	rs78120530	A	G	EYS	0.033	-1.42774	0.363807	8.92015e-05	NA	NA	NA	NA	0.033	-1.4277	0.3638	8.693e-05
6	65430193	rs74975029	C	T	EYS	0.034	-1.42447	0.360247	7.88702e-05	0.04	0.613998	0.505121	0.224415	0.036	-0.7372	0.2933	0.01195
6	65443020	rs114127013	A	G	EYS	0.967	1.45975	0.363929	6.21554e-05	0.96	-0.763759	0.505175	0.130851	0.9646	0.7001	0.2953	0.01775
6	65691688	rs116522020	C	T	EYS	0.968	1.60806	0.373851	1.76081e-05	NA	NA	NA	NA	0.968	1.6081	0.3739	1.698e-05
6	65693028	rs16896135	A	G	EYS	0.032	-1.60806	0.373851	1.76081e-05	NA	NA	NA	NA	0.032	-1.6081	0.3739	1.698e-05
6	66046442	rs6911046	C	G	EYS	0.762	0.608113	0.15563	9.56779e-05	NA	NA	NA	NA	0.762	0.6081	0.1556	9.328e-05
6	69184657	rs192204460	C	T		0.022	0.753887	0.433156	0.081899	0.02	-2.84294	0.71575	7.58587e-05	0.0215	-0.2103	0.3706	0.5704
6	75985718	rs73451786	C	T	TMEM30A	0.132	-0.328338	0.192494	0.0881833	0.128	-1.22088	0.29404	3.54608e-05	0.1308	-0.5961	0.1611	0.0002145
6	76259943	rs146318223	C	T		0.037	-0.395352	0.338997	0.243625	0.031	-2.34384	0.570507	4.27688e-05	0.0354	-0.9038	0.2914	0.001927
6	76392839	rs151109676	A	C	SENP6	0.961	0.444758	0.333734	0.182756	0.972	2.33763	0.594276	8.8868e-05	0.9636	0.8986	0.291	0.002015
6	78885707	rs113364170	A	C		0.952	-0.242526	0.299982	0.418897	0.949	1.87958	0.463193	5.29768e-05	0.9511	0.3845	0.2518	0.1267
6	78891697	rs111669843	G	GT		0.943	-0.117803	0.277692	0.67144	0.94	1.72414	0.423397	4.98748e-05	0.9421	0.4362	0.2322	0.0603
6	80118696	rs16890675	C	G		0.076	-0.804527	0.239823	0.000806063	0.067	-0.816223	0.392853	0.0379675	0.0736	-0.8077	0.2047	7.951e-05
6	89254528	rs114494919	C	T		0.954	1.23022	0.307625	6.53689e-05	NA	NA	NA	NA	0.954	1.2302	0.3076	6.358e-05
6	89731504	rs2748177	C	G		0.345	-0.547269	0.13622	6.04927e-05	0.336	-0.0722475	0.214697	0.73655	0.3424	-0.4109	0.115	0.0003534
6	91398384	rs8180578	A	T		0.382	0.0283331	0.13208	0.830162	0.349	-0.858272	0.20743	3.77316e-05	0.3725	-0.2274	0.1114	0.04121
6	91398595	rs8180580	G	T		0.393	0.00466953	0.131198	0.971611	0.352	-0.85254	0.207673	4.33441e-05	0.3813	-0.2399	0.1109	0.03058
6	91798802	rs9451578	G	T		0.073	-0.97955	0.247481	7.75907e-05	NA	NA	NA	NA	0.073	-0.9796	0.2475	7.555e-05
6	91808406	rs115678218	A	G		0.058	-1.09583	0.275307	7.07057e-05	0.045	0.784183	0.478377	0.101442	0.0548	-0.6281	0.2386	0.008483
6	96483645	rs536329209	A	AAATAT	FUT9	0.085	0.230597	0.231802	0.319925	0.063	-1.80556	0.404667	8.95022e-06	0.0796	-0.2725	0.2011	0.1756
6	104738786	rs11156382	A	G		0.766	0.0313614	0.154327	0.838984	0.717	-0.936381	0.22652	3.83641e-05	0.7505	-0.2754	0.1275	0.03081
6	115080182	rs9387247	A	G		0.827	0.381848	0.176144	0.0302636	0.814	0.957489	0.251062	0.00014438	0.8227	0.5717	0.1442	7.34e-05
6	115089967	rs9488469	C	T		0.772	0.336739	0.158108	0.0332827	0.764	0.917177	0.234307	9.612e-05	0.7695	0.5183	0.1311	7.654e-05
6	115094071	rs73769978	G	T		0.828	0.397763	0.176219	0.0240783	0.814	0.960613	0.251018	0.000136996	0.8234	0.5836	0.1442	5.205e-05
6	115383394	rs1080007	A	G		0.4	-0.163664	0.138662	0.237984	0.41	0.909528	0.200035	6.04089e-06	0.4032	0.1846	0.114	0.1052
6	115384681	rs6929717	C	T		0.475	0.127186	0.133031	0.339131	0.476	-0.768281	0.196719	9.96943e-05	0.4753	-0.1538	0.1102	0.1628
6	115386614	rs9488528	A	G		0.431	-0.181115	0.137583	0.188156	0.442	0.795679	0.200754	7.85768e-05	0.4345	0.131	0.1135	0.2482
6	115386675	rs372681659	C	CT		0.508	0.0326708	0.132299	0.80497	0.495	-0.829023	0.198185	3.10203e-05	0.504	-0.233	0.11	0.03425
6	115386708	rs9488529	A	G		0.602	0.153886	0.138373	0.266195	0.597	-0.869832	0.201899	1.79067e-05	0.6004	-0.1733	0.1141	0.129
6	115386800	rs112391873	A	G		0.088	-0.163497	0.226354	0.470171	0.089	1.71825	0.339967	5.04925e-07	0.0883	0.4145	0.1884	0.02782
6	115387071	rs398085240	G	GA		0.531	0.182564	0.133426	0.171345	0.533	-0.967005	0.195532	8.76246e-07	0.5316	-0.1827	0.1102	0.09745
6	115387207	rs34387384	A	G		0.407	-0.148428	0.138076	0.282487	0.414	0.888323	0.199948	9.76627e-06	0.4093	0.1863	0.1136	0.101
6	115387839	rs1034438	C	T		0.405	-0.16299	0.138086	0.23797	0.413	0.89932	0.199779	7.45365e-06	0.4076	0.1805	0.1136	0.1122
6	115388790	rs78726928	C	G		0.595	0.16299	0.138086	0.23797	0.587	-0.89932	0.199779	7.45365e-06	0.5924	-0.1805	0.1136	0.1122
6	115388799	rs149133166	A	T		0.475	0.037473	0.134025	0.77981	0.472	-0.801994	0.20284	8.17586e-05	0.4741	-0.2176	0.1118	0.05161
6	115388803	rs147075386	A	T		0.637	0.191517	0.139591	0.170186	0.631	-0.895174	0.203737	1.22023e-05	0.6351	-0.1556	0.1152	0.1765
6	115388804	rs73769642	A	T		0.637	0.191517	0.139591	0.170186	0.631	-0.895174	0.203737	1.22023e-05	0.6351	-0.1556	0.1152	0.1765
6	115388907	rs34825882	T	TC		0.53	0.169597	0.133216	0.203098	0.533	-0.956995	0.195737	1.16109e-06	0.5309	-0.187	0.1101	0.08943
6	115388972	rs1431807	C	T		0.595	0.16299	0.138086	0.23797	0.587	-0.89932	0.199779	7.45365e-06	0.5924	-0.1805	0.1136	0.1122
6	115390952	rs9488530	G	T		0.609	0.155954	0.138771	0.261192	0.597	-0.937438	0.200505	3.29308e-06	0.6051	-0.1982	0.1141	0.08245
6	115391499	rs78320410	C	T		0.595	0.16299	0.138086	0.23797	0.587	-0.89932	0.199779	7.45365e-06	0.5924	-0.1805	0.1136	0.1122
6	115391685	rs6568874	A	G		0.41	-0.183922	0.13787	0.182314	0.417	0.944511	0.198825	2.29441e-06	0.4123	0.1825	0.1133	0.1072
6	115391790	rs11414354	A	AT		0.405	-0.16299	0.138086	0.23797	0.413	0.89932	0.199779	7.45365e-06	0.4076	0.1805	0.1136	0.1122
6	115392565	rs35916996	A	G		0.595	0.16299	0.138086	0.23797	0.587	-0.89932	0.199779	7.45365e-06	0.5924	-0.1805	0.1136	0.1122
6	115392613	rs76611006	A	G		0.595	0.173973	0.138163	0.208079	0.586	-0.879079	0.200088	1.22199e-05	0.5921	-0.166	0.1137	0.1442
6	115392740	rs9488531	G	T		0.595	0.16299	0.138086	0.23797	0.587	-0.89932	0.199779	7.45365e-06	0.5924	-0.1805	0.1136	0.1122
6	115392995	rs67638943	G	GA		0.595	0.16299	0.138086	0.23797	0.587	-0.89932	0.199779	7.45365e-06	0.5924	-0.1805	0.1136	0.1122
6	115393107	rs9481507	A	T		0.405	-0.16299	0.138086	0.23797	0.413	0.89932	0.199779	7.45365e-06	0.4076	0.1805	0.1136	0.1122
6	115393713	rs200510717	G	GGT		0.447	-0.277902	0.135229	0.0399744	0.442	0.800281	0.197134	5.25951e-05	0.4454	0.0671	0.1115	0.5473
6	115393880	rs774844074	G	GTA		0.532	0.219435	0.132964	0.0989961	0.536	-0.89797	0.199131	7.18774e-06	0.5332	-0.1251	0.1106	0.2578
6	115394749	rs78411014	A	G		0.595	0.16299	0.138086	0.23797	0.587	-0.89932	0.199779	7.45365e-06	0.5924	-0.1805	0.1136	0.1122
6	115394935	rs80130915	C	T		0.405	-0.16299	0.138086	0.23797	0.413	0.89932	0.199779	7.45365e-06	0.4076	0.1805	0.1136	0.1122
6	115395352	rs75298189	C	T		0.599	0.199175	0.138183	0.149597	0.588	-0.906697	0.200117	6.50878e-06	0.5954	-0.1579	0.1137	0.165
6	115395680	rs79471370	C	T		0.595	0.16299	0.138086	0.23797	0.587	-0.89932	0.199779	7.45365e-06	0.5924	-0.1805	0.1136	0.1122
6	115395725	rs77171631	A	C		0.595	0.16299	0.138086	0.23797	0.587	-0.89932	0.199779	7.45365e-06	0.5924	-0.1805	0.1136	0.1122
6	115395961	rs35023505	A	C		0.391	-0.153271	0.138695	0.269224	0.403	0.937438	0.200505	3.29308e-06	0.3949	0.1997	0.1141	0.07996
6	115396066	rs35883354	C	G		0.47	-0.173866	0.133281	0.192175	0.468	0.941153	0.195398	1.66171e-06	0.4694	0.1802	0.1101	0.1017
6	115396265	rs1821126	A	G		0.405	-0.16299	0.138086	0.23797	0.413	0.89932	0.199779	7.45365e-06	0.4076	0.1805	0.1136	0.1122
6	115396814	rs962107	C	G		0.405	-0.16299	0.138086	0.23797	0.413	0.89932	0.199779	7.45365e-06	0.4076	0.1805	0.1136	0.1122
6	115396996	rs962106	C	T		0.599	0.199175	0.138183	0.149597	0.588	-0.906697	0.200117	6.50878e-06	0.5954	-0.1579	0.1137	0.165
6	115397127	rs35678980	A	C		0.401	-0.199175	0.138183	0.149597	0.412	0.906697	0.200117	6.50878e-06	0.4046	0.1579	0.1137	0.165
6	115397619	rs80309946	C	T		0.57	0.176746	0.136701	0.196148	0.567	-1.03678	0.199233	2.32205e-07	0.569	-0.2117	0.1127	0.06037
6	115397699	rs74296442	A	C		0.43	-0.176746	0.136701	0.196148	0.433	1.03678	0.199233	2.32205e-07	0.431	0.2117	0.1127	0.06037
6	115398213	rs35175059	A	G		0.43	-0.176746	0.136701	0.196148	0.433	1.03678	0.199233	2.32205e-07	0.431	0.2117	0.1127	0.06037
6	115398329	rs769161579	A	AT		0.086	-0.19496	0.229418	0.395514	0.087	1.68286	0.342403	1.02161e-06	0.0863	0.3869	0.1906	0.04238
6	115399042	rs35462115	G	GA		0.599	0.199175	0.138183	0.149597	0.588	-0.906697	0.200117	6.50878e-06	0.5954	-0.1579	0.1137	0.165
6	115399105	rs1431808	A	G		0.57	0.176746	0.136701	0.196148	0.567	-1.03678	0.199233	2.32205e-07	0.569	-0.2117	0.1127	0.06037
6	115399688	rs869249631	A	AT		0.599	0.199175	0.138183	0.149597	0.588	-0.906697	0.200117	6.50878e-06	0.5954	-0.1579	0.1137	0.165
6	115399774	rs1367887	C	T		0.599	0.199175	0.138183	0.149597	0.588	-0.906697	0.200117	6.50878e-06	0.5954	-0.1579	0.1137	0.165
6	115399856	rs1367888	A	G		0.43	-0.176746	0.136701	0.196148	0.433	1.03678	0.199233	2.32205e-07	0.431	0.2117	0.1127	0.06037
6	115399991	rs1367889	C	T		0.57	0.176746	0.136701	0.196148	0.566	-1.02845	0.199069	2.82769e-07	0.5687	-0.2095	0.1127	0.06307
6	115400009	rs1367890	C	T		0.57	0.176746	0.136701	0.196148	0.566	-1.02845	0.199069	2.82769e-07	0.5687	-0.2095	0.1127	0.06307
6	115400152	rs80156771	A	G		0.57	0.176746	0.136701	0.196148	0.566	-1.02845	0.199069	2.82769e-07	0.5687	-0.2095	0.1127	0.06307
6	115401003	rs34444011	A	T		0.599	0.199175	0.138183	0.149597	0.588	-0.906697	0.200117	6.50878e-06	0.5954	-0.1579	0.1137	0.165
6	115401350	rs75595486	G	T		0.405	-0.16299	0.138086	0.23797	0.413	0.89932	0.199779	7.45365e-06	0.4076	0.1805	0.1136	0.1122
6	115401479	rs74296443	G	T		0.533	0.202533	0.133054	0.128084	0.533	-0.947443	0.195628	1.45879e-06	0.533	-0.1612	0.11	0.1429
6	115401515	rs72495394	A	G		0.388	-0.192664	0.138937	0.165653	0.402	0.945366	0.200869	2.83814e-06	0.3925	0.1756	0.1143	0.1243
6	115401608	rs74609623	C	T		0.533	0.202533	0.133054	0.128084	0.533	-0.947443	0.195628	1.45879e-06	0.533	-0.1612	0.11	0.1429
6	115402059	rs77271028	A	T		0.566	0.188122	0.135821	0.166149	0.562	-1.00115	0.198911	5.62199e-07	0.5647	-0.19	0.1122	0.0902
6	115402112	rs34665976	A	G		0.43	-0.176746	0.136701	0.196148	0.434	1.03993	0.199082	2.09257e-07	0.4313	0.2131	0.1127	0.05862
6	115402604	rs74492424	G	T		0.43	-0.176746	0.136701	0.196148	0.434	1.02845	0.199069	2.82769e-07	0.4313	0.2095	0.1127	0.06307
6	115402911	rs73542854	C	T		0.57	0.176746	0.136701	0.196148	0.566	-1.02845	0.199069	2.82769e-07	0.5687	-0.2095	0.1127	0.06307
6	115402958	rs72495395	A	G		0.533	0.202533	0.133054	0.128084	0.533	-0.947443	0.195628	1.45879e-06	0.533	-0.1612	0.11	0.1429
6	115402990	rs77612314	G	T		0.599	0.199175	0.138183	0.149597	0.588	-0.906697	0.200117	6.50878e-06	0.5954	-0.1579	0.1137	0.165
6	115403256	rs4472389	C	G		0.595	0.16299	0.138086	0.23797	0.587	-0.89932	0.199779	7.45365e-06	0.5924	-0.1805	0.1136	0.1122
6	115403291	rs4612199	A	C		0.595	0.16299	0.138086	0.23797	0.587	-0.89932	0.199779	7.45365e-06	0.5924	-0.1805	0.1136	0.1122
6	115403617	rs201334245	G	T		0.57	0.173491	0.136633	0.204287	0.566	-1.02845	0.199069	2.82769e-07	0.5687	-0.2114	0.1127	0.06056
6	115403663	rs200540268	A	C		0.401	-0.199175	0.138183	0.149597	0.412	0.906697	0.200117	6.50878e-06	0.4046	0.1579	0.1137	0.165
6	115403796	rs140366244	A	T		0.402	-0.194264	0.138149	0.159787	0.412	0.91788	0.200163	5.0375e-06	0.4052	0.1646	0.1137	0.1478
6	115403799	rs148103362	A	G		0.599	0.205155	0.13812	0.137576	0.589	-0.891609	0.200411	9.49625e-06	0.5958	-0.148	0.1137	0.1931
6	115404683	rs141070109	A	G		0.401	-0.199175	0.138183	0.149597	0.412	0.906697	0.200117	6.50878e-06	0.4046	0.1579	0.1137	0.165
6	115404920	rs202053974	C	CA		0.56	0.139223	0.135772	0.305262	0.558	-1.00395	0.198666	5.06776e-07	0.5594	-0.2247	0.1121	0.04499
6	115404926	rs201523247	A	T		0.44	-0.139223	0.135772	0.305262	0.442	1.00395	0.198666	5.06776e-07	0.4406	0.2247	0.1121	0.04499
6	115404949	rs11963216	C	T		0.599	0.199175	0.138183	0.149597	0.588	-0.906697	0.200117	6.50878e-06	0.5954	-0.1579	0.1137	0.165
6	115405453	rs201632518	C	T		0.43	-0.167473	0.136561	0.220174	0.434	1.02845	0.199069	2.82769e-07	0.4313	0.2152	0.1126	0.05598
6	115405577	rs9481508	A	G		0.516	0.220285	0.132626	0.0968443	0.521	-0.903139	0.195072	4.09121e-06	0.5176	-0.1348	0.1097	0.2189
6	115405580	rs9481509	C	T		0.458	-0.239571	0.133446	0.0727284	0.458	0.768623	0.195804	9.18719e-05	0.458	0.0802	0.1103	0.4671
6	115405683	rs185908894	C	T		0.43	-0.163813	0.136598	0.230547	0.434	1.02845	0.199069	2.82769e-07	0.4313	0.2179	0.1126	0.05309
6	115406078	rs9481510	C	T		0.475	-0.206257	0.133016	0.121117	0.471	0.928169	0.195863	2.42666e-06	0.4737	0.1518	0.11	0.1677
6	115406177	rs9481511	C	G		0.425	-0.239942	0.137444	0.0809757	0.434	0.916649	0.197234	3.76071e-06	0.4279	0.1381	0.1128	0.2206
6	115407929	rs34383562	A	G		0.401	-0.199175	0.138183	0.149597	0.412	0.906697	0.200117	6.50878e-06	0.4046	0.1579	0.1137	0.165
6	115407973	rs35628687	C	T		0.43	-0.162477	0.13669	0.234686	0.433	1.01497	0.19939	4.1921e-07	0.431	0.214	0.1127	0.05771
6	115408571		C	T		0.401	-0.208451	0.138249	0.131729	0.412	0.906697	0.200117	6.50878e-06	0.4046	0.1518	0.1137	0.182
6	115408865	rs7761380	C	T		0.599	0.199175	0.138183	0.149597	0.588	-0.906697	0.200117	6.50878e-06	0.5954	-0.1579	0.1137	0.165
6	115409163	rs9488532	A	G		0.599	0.199175	0.138183	0.149597	0.588	-0.906697	0.200117	6.50878e-06	0.5954	-0.1579	0.1137	0.165
6	115409821	rs34520521	A	G		0.401	-0.199175	0.138183	0.149597	0.412	0.906697	0.200117	6.50878e-06	0.4046	0.1579	0.1137	0.165
6	115409889	rs75190849	C	T		0.401	-0.199175	0.138183	0.149597	0.412	0.906697	0.200117	6.50878e-06	0.4046	0.1579	0.1137	0.165
6	115410107	rs76308184	A	G		0.599	0.199175	0.138183	0.149597	0.588	-0.906697	0.200117	6.50878e-06	0.5954	-0.1579	0.1137	0.165
6	115410326	rs74615973	A	G		0.599	0.199175	0.138183	0.149597	0.588	-0.906697	0.200117	6.50878e-06	0.5954	-0.1579	0.1137	0.165
6	115410464	rs76279558	A	T		0.467	-0.193699	0.132926	0.145184	0.467	0.953952	0.19579	1.26246e-06	0.467	0.1684	0.11	0.1257
6	115410484	rs1431798	A	G		0.404	-0.22064	0.138127	0.110307	0.414	0.903227	0.199842	6.85336e-06	0.4072	0.1427	0.1136	0.2092
6	115410712	rs1431800	A	G		0.599	0.199175	0.138183	0.149597	0.588	-0.906697	0.200117	6.50878e-06	0.5954	-0.1579	0.1137	0.165
6	115410939	rs1835728	G	T		0.599	0.199175	0.138183	0.149597	0.588	-0.906697	0.200117	6.50878e-06	0.5954	-0.1579	0.1137	0.165
6	115411141	rs34561401	A	G		0.401	-0.199175	0.138183	0.149597	0.412	0.906697	0.200117	6.50878e-06	0.4046	0.1579	0.1137	0.165
6	115411302	rs34686196	A	G		0.599	0.199175	0.138183	0.149597	0.588	-0.906697	0.200117	6.50878e-06	0.5954	-0.1579	0.1137	0.165
6	115411336	rs34289559	C	T		0.401	-0.199175	0.138183	0.149597	0.412	0.906697	0.200117	6.50878e-06	0.4046	0.1579	0.1137	0.165
6	115411424	rs79423437	A	T		0.599	0.199175	0.138183	0.149597	0.588	-0.906697	0.200117	6.50878e-06	0.5954	-0.1579	0.1137	0.165
6	115411534	rs78503765	A	G		0.599	0.199175	0.138183	0.149597	0.588	-0.906697	0.200117	6.50878e-06	0.5954	-0.1579	0.1137	0.165
6	115412431	rs765592	C	T		0.405	-0.16299	0.138086	0.23797	0.413	0.89932	0.199779	7.45365e-06	0.4076	0.1805	0.1136	0.1122
6	115412432	rs1346981	A	G		0.401	-0.199175	0.138183	0.149597	0.412	0.906697	0.200117	6.50878e-06	0.4046	0.1579	0.1137	0.165
6	115413288	rs238556	A	G		0.425	-0.159597	0.135582	0.239254	0.428	0.984378	0.198106	7.78667e-07	0.426	0.2053	0.1119	0.06651
6	115413919	rs238558	A	G		0.401	-0.15619	0.13731	0.255436	0.408	0.828366	0.198663	3.28673e-05	0.4033	0.1621	0.113	0.1513
6	115415058	rs2022110	C	T		0.397	-0.132366	0.138263	0.338481	0.404	0.784763	0.200392	9.54475e-05	0.3993	0.1634	0.1138	0.151
6	115417548	rs2023513	A	G		0.603	0.132366	0.138263	0.338481	0.596	-0.784763	0.200392	9.54475e-05	0.6007	-0.1634	0.1138	0.151
6	115418442	rs182970	G	T		0.427	-0.128931	0.135748	0.342312	0.429	0.97409	0.197479	9.34674e-07	0.4276	0.225	0.1119	0.04427
6	115418455	rs34812312	T	TAA		0.437	-0.143354	0.134087	0.285118	0.443	0.989782	0.197057	5.92661e-07	0.4389	0.2153	0.1109	0.05217
6	115419711	rs238601	A	G		0.424	-0.181203	0.135758	0.182075	0.428	0.980975	0.19774	8.10775e-07	0.4253	0.1911	0.1119	0.08773
6	115419825	rs238602	C	T		0.537	0.176572	0.132028	0.181213	0.535	-0.903843	0.194127	3.61313e-06	0.5364	-0.1651	0.1092	0.1304
6	115420940	rs4434500	C	G		0.393	-0.194441	0.138357	0.160033	0.403	0.791584	0.200747	8.54228e-05	0.3962	0.1231	0.1139	0.2799
6	115421614	rs35962785	A	AGTC		0.607	0.189192	0.138398	0.171739	0.597	-0.791584	0.200747	8.54228e-05	0.6038	-0.1268	0.1139	0.2658
6	115422430	rs2082298	G	T		0.394	-0.186495	0.138326	0.177704	0.403	0.791584	0.200747	8.54228e-05	0.3969	0.1284	0.1139	0.2597
6	115422659	rs74296445	A	G		0.532	0.183964	0.132794	0.166069	0.528	-0.930777	0.195418	2.1587e-06	0.5307	-0.1682	0.1098	0.1257
6	115423507	rs201784637	A	ATTAT		0.442	-0.203967	0.133913	0.127849	0.452	0.795575	0.196809	5.65531e-05	0.4452	0.1123	0.1107	0.3102
6	115423598	rs149276713	T	TATATATAC		0.535	0.192064	0.132859	0.148405	0.528	-0.937646	0.195356	1.8054e-06	0.5328	-0.1652	0.1099	0.1326
6	115424296	rs374355198	T	TGGA		0.567	0.147102	0.136458	0.281131	0.563	-1.00635	0.198046	4.39103e-07	0.5657	-0.2242	0.1124	0.046
6	115425936	rs9393114	A	C		0.468	-0.189524	0.132655	0.153211	0.472	0.925669	0.195037	2.34316e-06	0.4693	0.1632	0.1097	0.1368
6	115426742	rs75000007	C	T		0.471	-0.153433	0.132896	0.248387	0.475	0.926701	0.194805	2.22197e-06	0.4723	0.1896	0.1098	0.08415
6	115427117	rs2021410	G	T		0.433	-0.137016	0.136569	0.315823	0.438	0.99399	0.197591	5.69758e-07	0.4346	0.2286	0.1123	0.04186
6	115428341	rs34913447	A	T		0.532	0.179125	0.13276	0.177378	0.527	-0.912569	0.195292	3.33304e-06	0.5304	-0.1659	0.1098	0.1307
6	115430241	rs397723534	C	CA		0.728	0.0127326	0.145601	0.930321	0.73	-1.12193	0.220306	4.14468e-07	0.7286	-0.3322	0.1215	0.006239
6	115440739	rs17076619	A	G		0.53	0.190199	0.132761	0.152081	0.527	-0.915821	0.195176	3.03708e-06	0.5291	-0.1597	0.1098	0.1458
6	115465834	rs17164604	C	T		0.536	0.167107	0.132045	0.205796	0.539	-0.834232	0.194698	1.98747e-05	0.5369	-0.1484	0.1093	0.1746
6	115469574	rs2009104	A	G		0.465	-0.175019	0.131809	0.184354	0.462	0.830709	0.194509	2.11385e-05	0.4641	0.1415	0.1091	0.1948
6	115651316	rs4335017	C	G		0.464	0.130133	0.133397	0.32939	0.477	-0.837438	0.195102	1.92203e-05	0.4681	-0.1781	0.1101	0.1058
6	115651339	rs4318913	C	G		0.464	-0.0920931	0.13372	0.491072	0.458	0.852401	0.197012	1.64991e-05	0.4621	0.2058	0.1106	0.06289
6	115651442	rs4577833	A	G		0.464	0.130133	0.133397	0.32939	0.477	-0.837438	0.195102	1.92203e-05	0.4681	-0.1781	0.1101	0.1058
6	115651444	rs4548040	A	G		0.464	0.130133	0.133397	0.32939	0.477	-0.837438	0.195102	1.92203e-05	0.4681	-0.1781	0.1101	0.1058
6	115651471	rs4577834	A	T		0.464	0.130133	0.133397	0.32939	0.477	-0.837438	0.195102	1.92203e-05	0.4681	-0.1781	0.1101	0.1058
6	115651623	rs4615423	A	G		0.464	0.130133	0.133397	0.32939	0.477	-0.837438	0.195102	1.92203e-05	0.4681	-0.1781	0.1101	0.1058
6	115651996	rs12203714	A	G		0.536	-0.130133	0.133397	0.32939	0.523	0.837438	0.195102	1.92203e-05	0.5319	0.1781	0.1101	0.1058
6	115653237	rs9481541	A	G		0.534	0.095348	0.133818	0.476208	0.54	-0.835091	0.196331	2.28127e-05	0.5359	-0.1998	0.1106	0.07079
6	115653715	rs6938602	G	T		0.537	-0.133144	0.133545	0.318858	0.524	0.815831	0.194736	3.01758e-05	0.5328	0.1704	0.1101	0.1218
6	115653731	rs6938613	A	G		0.463	0.133144	0.133545	0.318858	0.476	-0.815831	0.194736	3.01758e-05	0.4672	-0.1704	0.1101	0.1218
6	115653858	rs6938338	A	T		0.537	-0.133144	0.133545	0.318858	0.524	0.815831	0.194736	3.01758e-05	0.5328	0.1704	0.1101	0.1218
6	115654060	rs6918482	C	T		0.463	0.133144	0.133545	0.318858	0.476	-0.815831	0.194736	3.01758e-05	0.4672	-0.1704	0.1101	0.1218
6	115654442	rs6919189	C	T		0.468	0.113863	0.133627	0.39424	0.479	-0.825518	0.194675	2.41512e-05	0.4715	-0.187	0.1102	0.08965
6	115654943	rs12195915	C	T		0.312	0.0250169	0.139263	0.857451	0.298	0.888498	0.214719	3.76781e-05	0.3079	0.2807	0.1168	0.01629
6	115655223	rs6902551	A	G		0.618	0.0129198	0.134154	0.923285	0.639	-0.802983	0.204659	9.26089e-05	0.6243	-0.2323	0.1122	0.03842
6	115655829	rs12204883	A	T		0.618	0.0129198	0.134154	0.923285	0.639	-0.802983	0.204659	9.26089e-05	0.6243	-0.2323	0.1122	0.03842
6	115656335		A	G		0.618	0.0129198	0.134154	0.923285	0.639	-0.802983	0.204659	9.26089e-05	0.6243	-0.2323	0.1122	0.03842
6	115656681	rs4352711	C	T		0.382	-0.0129198	0.134154	0.923285	0.361	0.802983	0.204659	9.26089e-05	0.3757	0.2323	0.1122	0.03842
6	115657784	rs6919948	C	G		0.616	0.0124148	0.13411	0.926251	0.636	-0.806643	0.205406	9.12665e-05	0.622	-0.2324	0.1123	0.03851
6	115657785	rs6919627	C	T		0.384	-0.0124148	0.13411	0.926251	0.364	0.806643	0.205406	9.12665e-05	0.378	0.2324	0.1123	0.03851
6	115658179	rs12208891	C	T		0.618	0.0101528	0.134071	0.939642	0.64	-0.814832	0.204804	7.38021e-05	0.6246	-0.2373	0.1122	0.03437
6	115659106	rs4571597	A	T		0.382	-0.0129198	0.134154	0.923285	0.361	0.802983	0.204659	9.26089e-05	0.3757	0.2323	0.1122	0.03842
6	115659131	rs4382316	A	C		0.382	-0.0129198	0.134154	0.923285	0.361	0.802983	0.204659	9.26089e-05	0.3757	0.2323	0.1122	0.03842
6	115659152	rs4441978	A	T		0.618	0.0129198	0.134154	0.923285	0.639	-0.802983	0.204659	9.26089e-05	0.6243	-0.2323	0.1122	0.03842
6	115659168	rs4441979	C	T		0.618	0.0129198	0.134154	0.923285	0.639	-0.802983	0.204659	9.26089e-05	0.6243	-0.2323	0.1122	0.03842
6	115660744	rs11153552	C	T		0.62	-0.000242922	0.134145	0.998555	0.641	-0.804452	0.205698	9.75364e-05	0.6263	-0.2402	0.1124	0.03253
6	115660938	rs9374532	A	G		0.294	0.0602518	0.140978	0.669135	0.283	0.916073	0.218883	3.07323e-05	0.2908	0.3112	0.1185	0.008651
6	115661142	rs12210746	A	C		0.38	0.000242922	0.134145	0.998555	0.359	0.804452	0.205698	9.75364e-05	0.3737	0.2402	0.1124	0.03253
6	115661521	rs12197666	A	G		0.618	-0.0100995	0.133977	0.939917	0.641	-0.804452	0.205698	9.75364e-05	0.6249	-0.2467	0.1123	0.02798
6	115662380	rs10872133	A	G		0.382	0.0100995	0.133977	0.939917	0.359	0.804452	0.205698	9.75364e-05	0.3751	0.2467	0.1123	0.02798
6	115662442	rs10872135	C	T		0.618	-0.0100995	0.133977	0.939917	0.641	-0.804452	0.205698	9.75364e-05	0.6249	-0.2467	0.1123	0.02798
6	115664623	rs10456900	C	G		0.381	-0.00698334	0.134105	0.958474	0.36	0.810971	0.20513	8.18886e-05	0.3747	0.2379	0.1122	0.03403
6	115664882	rs13194601	A	G		0.381	-0.00698334	0.134105	0.958474	0.36	0.810971	0.20513	8.18886e-05	0.3747	0.2379	0.1122	0.03403
6	115664915	rs34073538	A	G		0.381	-0.00698334	0.134105	0.958474	0.36	0.810971	0.20513	8.18886e-05	0.3747	0.2379	0.1122	0.03403
6	115665905	rs11756958	C	G		0.619	0.00698334	0.134105	0.958474	0.64	-0.810971	0.20513	8.18886e-05	0.6253	-0.2379	0.1122	0.03403
6	115667134	rs7758943	C	T		0.62	-0.00342117	0.13418	0.979661	0.641	-0.804452	0.205698	9.75364e-05	0.6263	-0.2425	0.1124	0.03092
6	115675953	rs34325053	C	T		0.38	0.0249503	0.13433	0.852664	0.363	0.832287	0.205547	5.49645e-05	0.3749	0.2666	0.1124	0.01776
6	117860134	rs73766231	A	G	GOPC	0.932	-1.0158	0.252941	6.0894e-05	0.941	-0.0711693	0.424308	0.866826	0.9344	-0.7681	0.2173	0.0004071
6	117874432	rs73766235	A	G	GOPC	0.044	1.26407	0.316437	6.65872e-05	0.042	-0.100665	0.510241	0.843637	0.0434	0.885	0.2689	0.0009988
6	117878537	rs138345474	T	TC	GOPC	0.076	1.00825	0.242684	3.36497e-05	0.062	0.106244	0.42387	0.80213	0.0725	0.7856	0.2106	0.0001915
6	117878720	rs78518192	A	G	GOPC	0.924	-1.00825	0.242684	3.36497e-05	0.938	-0.106244	0.42387	0.80213	0.9275	-0.7856	0.2106	0.0001915
6	117894107	rs73766244	A	T	GOPC	0.924	-0.989004	0.242569	4.6959e-05	0.941	-0.0823375	0.431561	0.848725	0.9281	-0.7713	0.2115	0.0002646
6	117895814	rs73766245	A	G	GOPC	0.076	0.989004	0.242569	4.6959e-05	0.059	0.0823375	0.431561	0.848725	0.0719	0.7713	0.2115	0.0002646
6	117903683		A	T	GOPC	0.076	0.989004	0.242569	4.6959e-05	0.059	0.0924452	0.432606	0.830825	0.0719	0.7745	0.2116	0.0002514
6	117903992	rs73766247	A	G	GOPC	0.076	0.989004	0.242569	4.6959e-05	0.059	0.0924452	0.432606	0.830825	0.0719	0.7745	0.2116	0.0002514
6	117906443	rs73766249	G	T	GOPC	0.076	0.989004	0.242569	4.6959e-05	0.059	0.0924452	0.432606	0.830825	0.0719	0.7745	0.2116	0.0002514
6	117909201	rs74794272	A	T	GOPC	0.943	-1.16486	0.279495	3.17777e-05	0.952	-0.194835	0.471255	0.679364	0.9453	-0.9124	0.2404	0.0001473
6	117913208	rs75983342	C	T	GOPC	0.076	0.989004	0.242569	4.6959e-05	0.059	0.0878817	0.431175	0.838532	0.0719	0.7724	0.2114	0.0002588
6	117915860	rs55949814	A	G	GOPC	0.076	0.989004	0.242569	4.6959e-05	0.06	0.119046	0.42867	0.781286	0.0721	0.778	0.2111	0.0002285
6	117917274	rs144304778	C	T	GOPC	0.076	0.989004	0.242569	4.6959e-05	0.06	0.119046	0.42867	0.781286	0.0721	0.778	0.2111	0.0002285
6	117920781	rs73766253	C	T	GOPC	0.94	-1.12561	0.27276	3.79602e-05	0.95	-0.103154	0.46387	0.824062	0.9426	-0.8629	0.2351	0.0002425
6	117931417	rs76245504	C	G		0.077	0.99761	0.242336	3.9649e-05	0.06	0.228684	0.429047	0.594137	0.0729	0.8116	0.211	0.0001198
6	117933052	rs55881769	A	G		0.923	-0.99761	0.242336	3.9649e-05	0.94	-0.228684	0.429047	0.594137	0.9271	-0.8116	0.211	0.0001198
6	117933867	rs78456087	A	G		0.06	1.13589	0.272395	3.1464e-05	0.051	0.17788	0.462371	0.700524	0.0577	0.8891	0.2347	0.0001518
6	117934079	rs56119553	A	G		0.077	0.99761	0.242336	3.9649e-05	0.06	0.228684	0.429047	0.594137	0.0729	0.8116	0.211	0.0001198
6	117937184	rs73766257	C	T		0.93	-1.03962	0.252896	4.06473e-05	0.942	-0.208173	0.435673	0.632872	0.933	-0.8301	0.2187	0.0001475
6	117944381	rs73766258	C	T		0.942	-1.08188	0.275939	9.05777e-05	0.949	-0.244383	0.462449	0.597289	0.9438	-0.862	0.237	0.0002751
6	117949583	rs201088773	C	CA		0.925	-0.962286	0.244693	8.62359e-05	0.94	-0.286006	0.429038	0.505152	0.9287	-0.7963	0.2126	0.0001794
6	117959263	rs55779944	C	G		0.925	-0.962223	0.244415	8.47414e-05	0.943	-0.302667	0.443435	0.495034	0.9292	-0.8085	0.2141	0.0001586
6	117960751	rs73766260	C	T		0.075	0.962223	0.244415	8.47414e-05	0.057	0.302667	0.443435	0.495034	0.0708	0.8085	0.2141	0.0001586
6	117962428	rs1343890	A	T		0.918	-0.998057	0.232357	1.80858e-05	0.941	-0.286383	0.437552	0.512917	0.9231	-0.8415	0.2052	4.121e-05
6	117969690	rs138860729	C	T		0.925	-0.962223	0.244415	8.47414e-05	0.943	-0.302667	0.443435	0.495034	0.9292	-0.8085	0.2141	0.0001586
6	117970313	rs78503175	A	G		0.942	-1.08468	0.275147	8.28856e-05	0.952	-0.182869	0.479409	0.702945	0.9445	-0.8612	0.2386	0.0003074
6	117973182	rs115830243	C	G		0.058	1.09538	0.276125	7.47708e-05	0.047	0.116683	0.485894	0.810265	0.0553	0.8565	0.2401	0.0003602
6	117978295	rs79272894	G	T		0.071	1.00183	0.251372	6.92211e-05	0.053	0.0577784	0.457931	0.899618	0.0668	0.7832	0.2204	0.0003788
6	117983616	rs147745553	C	T		0.076	0.974624	0.241927	5.7733e-05	0.055	0.172273	0.450553	0.702268	0.0713	0.7951	0.2131	0.0001914
6	117984090	rs139588521	A	G		0.057	1.13787	0.277088	4.14141e-05	0.045	-0.00645003	0.494815	0.989602	0.0541	0.8647	0.2418	0.0003481
6	117984418	rs75811402	A	G		0.042	1.2798	0.322182	7.31338e-05	0.034	-0.055382	0.561383	0.921432	0.04	0.949	0.2794	0.0006835
6	117993756	rs73766263	C	T		0.931	-1.03019	0.25608	5.91299e-05	0.948	-0.0809281	0.463507	0.861426	0.935	-0.8082	0.2241	0.0003113
6	127912805	rs116764608	C	T	C6orf58	0.019	-2.00899	0.468611	1.87647e-05	0.015	-0.370891	0.815014	0.649146	0.018	-1.602	0.4062	8.033e-05
6	127913702	rs144128087	C	G		0.019	-2.00899	0.468611	1.87647e-05	0.015	-0.370891	0.815014	0.649146	0.018	-1.602	0.4062	8.033e-05
6	127913703	rs148671997	G	T		0.981	2.00899	0.468611	1.87647e-05	0.985	0.370891	0.815014	0.649146	0.982	1.602	0.4062	8.033e-05
6	127914634	rs574553328	A	G		0.983	2.0237	0.488073	3.48788e-05	0.985	0.156576	0.827357	0.849933	0.9835	1.5417	0.4204	0.0002451
6	127914731		C	T		0.421	-0.542453	0.128072	2.36002e-05	0.432	0.0450037	0.200693	0.82261	0.4242	-0.3725	0.108	0.0005609
6	127914760	rs6569507	A	C		0.444	-0.514928	0.127666	5.65717e-05	0.453	0.000443738	0.199343	0.998224	0.4466	-0.365	0.1075	0.0006854
6	127914874	rs571906623	A	C		0.019	-1.85377	0.464358	6.73149e-05	NA	NA	NA	NA	0.019	-1.8538	0.4644	6.549e-05
6	127915332	rs184937291	A	G		0.019	-2.07476	0.457	5.88487e-06	NA	NA	NA	NA	0.019	-2.0748	0.457	5.627e-06
6	127916871	rs538793423	A	G		0.981	2.00899	0.468611	1.87647e-05	0.985	0.370891	0.815014	0.649146	0.982	1.602	0.4062	8.033e-05
6	127917661	rs551054802	A	T		0.019	-2.00899	0.468611	1.87647e-05	0.015	-0.370891	0.815014	0.649146	0.018	-1.602	0.4062	8.033e-05
6	127919633	rs80224719	A	C		0.419	-0.540021	0.129491	3.14168e-05	0.429	-0.109215	0.199757	0.584666	0.422	-0.4126	0.1087	0.0001466
6	127920925	rs4897222	C	T		0.445	-0.529556	0.127707	3.48275e-05	0.455	-0.00458369	0.198889	0.981617	0.4479	-0.3763	0.1075	0.0004623
6	127921998	rs397760605	T	TA		0.556	0.529807	0.127831	3.51369e-05	0.547	-0.0275419	0.198972	0.889933	0.5534	0.367	0.1075	0.0006445
6	127922451	rs141387783	A	C		0.02	-2.0542	0.460662	8.57669e-06	0.015	-0.370891	0.815014	0.649146	0.0188	-1.6466	0.401	4.026e-05
6	127922570	rs115535470	A	G		0.98	2.0542	0.460662	8.57669e-06	0.985	0.370891	0.815014	0.649146	0.9812	1.6466	0.401	4.026e-05
6	127922622	rs144819269	G	GGATCAGCA		0.98	2.0542	0.460662	8.57669e-06	0.985	0.370891	0.815014	0.649146	0.9812	1.6466	0.401	4.026e-05
6	127923322	rs6908338	C	G		0.445	-0.524468	0.127614	4.08335e-05	0.455	-0.0099402	0.199107	0.960192	0.4479	-0.3746	0.1074	0.0004884
6	127925329	rs9491836	C	T		0.428	-0.535047	0.128644	3.29881e-05	0.445	-0.0155963	0.199306	0.937641	0.433	-0.3823	0.1081	0.0004049
6	127927415	rs115927926	C	T		0.98	2.0542	0.460662	8.57669e-06	0.985	0.370891	0.815014	0.649146	0.9812	1.6466	0.401	4.026e-05
6	127928118	rs116028862	A	G		0.98	2.0542	0.460662	8.57669e-06	0.985	0.370891	0.815014	0.649146	0.9812	1.6466	0.401	4.026e-05
6	127930517	rs75954805	A	G		0.02	-2.0542	0.460662	8.57669e-06	0.016	-0.291599	0.803262	0.71666	0.019	-1.618	0.3996	5.147e-05
6	127933525	rs114395728	C	T		0.02	-2.0542	0.460662	8.57669e-06	0.016	-0.291599	0.803262	0.71666	0.019	-1.618	0.3996	5.147e-05
6	127936418	rs144129411	A	ATT		0.02	-2.00822	0.454099	1.0164e-05	0.015	-0.0812605	0.815039	0.920599	0.0188	-1.5518	0.3967	9.161e-05
6	127948031	rs115857324	C	T		0.981	1.98299	0.463057	1.91654e-05	0.985	0.109388	0.827028	0.894798	0.982	1.5358	0.404	0.000144
6	127960264	rs114715620	A	C		0.047	-1.19191	0.303384	8.76443e-05	0.039	0.512225	0.512424	0.317716	0.0449	-0.7496	0.2611	0.004087
6	128117352	rs73771854	A	C	THEMIS	0.934	0.961959	0.2585	0.000202421	0.936	0.600733	0.406141	0.139389	0.9346	0.8578	0.2181	8.369e-05
6	128132844	rs368009660	C	CTCATT	THEMIS	0.031	-1.58233	0.367313	1.71011e-05	0.035	-1.00582	0.535073	0.0603985	0.0323	-1.3977	0.3028	3.923e-06
6	128272876	rs802743	A	T		0.478	0.530645	0.127887	3.4426e-05	0.449	-0.0469846	0.201757	0.815899	0.4697	0.3651	0.108	0.0007251
6	128284771	rs802721	A	G		0.5	-0.535114	0.128364	3.16416e-05	0.52	-0.0604442	0.199453	0.761909	0.5059	-0.3961	0.1079	0.000243
6	130456292	rs34281352	C	T	L3MBTL3	0.977	0.0700139	0.421535	0.868097	0.973	2.41209	0.612923	8.82052e-05	0.9757	0.8221	0.3473	0.01794
6	130470516	rs71571002	A	C	SAMD3	0.015	0.0647042	0.511664	0.899379	0.015	-3.30552	0.827113	6.85249e-05	0.015	-0.8681	0.4351	0.04605
6	130470711	rs34198126	A	G	SAMD3	0.985	-0.0647042	0.511664	0.899379	0.985	3.30552	0.827113	6.85249e-05	0.985	0.8681	0.4351	0.04605
6	130994647	rs9398958	A	C		0.975	0.271778	0.405433	0.5027	0.97	2.36965	0.569226	3.38421e-05	0.9733	0.9778	0.3302	0.003066
6	132082808	rs7765331	C	T		0.175	0.0564154	0.171793	0.742642	0.165	-1.04547	0.264223	8.07773e-05	0.172	-0.271	0.144	0.0599
6	133264505	rs141459048	C	CAAAT		0.019	-0.302948	0.478407	0.526631	0.019	-2.81032	0.710077	8.0442e-05	0.019	-1.0858	0.3968	0.006208
6	133265083	rs116180228	A	G		0.02	-0.377383	0.467304	0.41941	0.019	-2.79254	0.70236	7.462e-05	0.0197	-1.1184	0.3891	0.004043
6	135535798	rs75319703	C	T	MYB	0.987	0.223341	0.572204	0.696334	0.989	3.80316	0.960549	7.99142e-05	0.9875	1.161	0.4916	0.01819
6	135541214	rs111774234	A	G		0.013	-0.218402	0.573508	0.70337	0.011	-3.73263	0.941657	7.84322e-05	0.0125	-1.1692	0.4898	0.01698
6	136655074	rs116106841	C	T		0.974	1.59007	0.407986	9.97254e-05	NA	NA	NA	NA	0.974	1.5901	0.408	9.725e-05
6	137999562	rs397886367	G	GA		0.124	-0.074206	0.193716	0.701702	0.127	-1.37215	0.298641	4.82898e-06	0.1249	-0.4586	0.1625	0.004776
6	141729161	rs78849396	C	T		0.968	-1.1389	0.367515	0.00196314	0.973	-1.47861	0.605599	0.0147786	0.9693	-1.2303	0.3142	9.005e-05
6	142431047	rs9373338	C	T		0.266	0.482692	0.145491	0.000920271	0.274	0.456181	0.217626	0.0362923	0.2685	0.4745	0.121	8.742e-05
6	147242595	rs200689836	T	TA		0.063	0.803007	0.264025	0.00237844	0.042	1.4992	0.499291	0.00273593	0.0584	0.9551	0.2334	4.272e-05
6	148449754	rs78699910	A	G		0.946	-1.07568	0.285978	0.000172723	0.959	-1.15842	0.500948	0.0209342	0.9492	-1.096	0.2484	1.019e-05
6	148461351	rs115619289	A	G		0.063	0.869725	0.264868	0.00103852	0.051	1.03392	0.453743	0.0228767	0.06	0.9115	0.2287	6.761e-05
6	148472501	rs76808480	C	T		0.939	-0.895874	0.270215	0.000927733	0.952	-1.16586	0.467721	0.0128239	0.9423	-0.9634	0.234	3.827e-05
6	149896318	rs4870139	C	T	GINM1	0.205	-0.583305	0.160658	0.000288111	0.227	-0.4262	0.238998	0.0748134	0.2118	-0.5344	0.1333	6.121e-05
6	149909377	rs9767713	G	T	GINM1	0.209	-0.559432	0.159556	0.000462362	0.228	-0.438039	0.238314	0.0663167	0.2149	-0.5219	0.1326	8.283e-05
6	149913867	rs11155662	G	T		0.202	-0.61588	0.161562	0.000141055	0.225	-0.444152	0.238421	0.0627402	0.2092	-0.5618	0.1337	2.66e-05
6	149914338	rs397887968	G	GA		0.202	-0.61588	0.161562	0.000141055	0.225	-0.444152	0.238421	0.0627402	0.2092	-0.5618	0.1337	2.66e-05
6	149929174	rs9404047	A	C	KATNA1	0.196	-0.588639	0.162193	0.000289775	0.223	-0.389964	0.240331	0.104955	0.2044	-0.5265	0.1344	9.005e-05
6	149938996	rs9406345	C	T	KATNA1	0.207	-0.621379	0.1594	9.93662e-05	0.231	-0.489208	0.236762	0.0390365	0.2145	-0.5802	0.1322	1.146e-05
6	149939563	rs11155668	A	G	KATNA1	0.207	-0.622147	0.159317	9.66049e-05	0.231	-0.489208	0.236762	0.0390365	0.2145	-0.5807	0.1322	1.116e-05
6	149954717	rs75735037	A	AAGTT	KATNA1	0.208	-0.623036	0.158976	9.12078e-05	0.23	-0.494734	0.237369	0.0373657	0.2148	-0.5833	0.1321	1.005e-05
6	149954968	rs12201033	C	T	KATNA1	0.73	0.563153	0.144215	9.66552e-05	0.715	0.396275	0.216058	0.0669038	0.7254	0.5117	0.1199	1.989e-05
6	149955600	rs9800686	A	C	KATNA1	0.791	0.620703	0.158854	9.56979e-05	0.77	0.494734	0.237369	0.0373657	0.7845	0.5817	0.132	1.051e-05
6	149956466	rs55849538	C	T	KATNA1	0.232	-0.520201	0.153165	0.000693237	0.249	-0.52782	0.230954	0.0224774	0.2372	-0.5225	0.1276	4.248e-05
6	149961552	rs62439811	C	T	KATNA1	0.792	0.618427	0.159131	0.000104353	0.77	0.46986	0.237337	0.047981	0.7852	0.5724	0.1322	1.489e-05
6	149963083	rs12206402	C	G	KATNA1	0.214	-0.601715	0.157824	0.000140743	0.239	-0.546682	0.234602	0.0199708	0.2218	-0.5846	0.1309	8.042e-06
6	149964105	rs57938011	A	T	KATNA1	0.206	-0.635312	0.159863	7.2579e-05	0.231	-0.484939	0.237164	0.0411146	0.2138	-0.5883	0.1326	9.069e-06
6	149968158	rs9767555	C	T	KATNA1	0.211	-0.610592	0.158327	0.000117819	0.23	-0.447305	0.237696	0.0601181	0.2168	-0.5604	0.1318	2.11e-05
6	149973764	rs12523793	A	G		0.199	-0.620623	0.16174	0.000127442	0.227	-0.527995	0.238915	0.0273101	0.2078	-0.5915	0.1339	1.003e-05
6	149979416	rs1125	A	G	LATS1	0.187	-0.645405	0.166053	0.000104158	0.209	-0.604022	0.245811	0.0141516	0.1939	-0.6324	0.1376	4.302e-06
6	149991516	rs62439837	G	T	LATS1	0.811	0.657096	0.164179	6.44924e-05	0.789	0.475534	0.246093	0.053572	0.8042	0.6012	0.1366	1.074e-05
6	149995775	rs62439840	A	G	LATS1	0.2	-0.621193	0.162366	0.000133391	0.227	-0.490016	0.23941	0.0409155	0.2085	-0.5799	0.1344	1.595e-05
6	149998723	rs9393175	A	G	LATS1	0.8	0.621193	0.162366	0.000133391	0.773	0.490016	0.23941	0.0409155	0.7915	0.5799	0.1344	1.595e-05
6	150015030	rs7754399	A	T	LATS1	0.796	0.639112	0.160226	6.82507e-05	0.771	0.465159	0.238994	0.0518675	0.7882	0.5852	0.1331	1.098e-05
6	150023348	rs4870509	C	G	LATS1	0.792	0.605145	0.158984	0.000144329	0.766	0.447196	0.237086	0.0595251	0.7839	0.5562	0.132	2.533e-05
6	150025122	rs9322214	C	T	LATS1	0.795	0.622771	0.159942	0.000101218	0.77	0.447899	0.238409	0.0605468	0.7872	0.5685	0.1328	1.868e-05
6	150025629	rs397818632	G	GT	LATS1	0.787	0.623223	0.157313	7.64409e-05	0.761	0.43538	0.23353	0.0625367	0.7789	0.5646	0.1305	1.509e-05
6	150026196	rs6913486	C	T	LATS1	0.2	-0.605104	0.162269	0.000196368	0.227	-0.544507	0.239556	0.0232168	0.2085	-0.586	0.1343	1.288e-05
6	150039293	rs9767113	C	T	LATS1	0.208	-0.605145	0.158984	0.000144329	0.235	-0.44928	0.236873	0.0581238	0.2164	-0.5567	0.132	2.471e-05
6	150064019	rs11155675	C	T	NUP43	0.186	-0.617475	0.166319	0.000209481	0.207	-0.581182	0.247382	0.0189809	0.1925	-0.6062	0.138	1.124e-05
6	150066468	rs60424881	C	G	NUP43	0.2	-0.616844	0.162261	0.000147111	0.227	-0.527636	0.239922	0.0280687	0.2085	-0.5888	0.1344	1.181e-05
6	150069391	rs3763161	C	G	NUP43	0.207	-0.618698	0.158984	0.000102114	0.234	-0.46736	0.236867	0.0487326	0.2154	-0.5717	0.132	1.486e-05
6	150075273	rs10782318	C	T	PCMT1	0.199	-0.605392	0.162239	0.000194458	0.229	-0.526691	0.239858	0.0283084	0.2084	-0.5807	0.1344	1.553e-05
6	150079823	rs10872647	C	T	PCMT1	0.186	-0.609433	0.166058	0.000247454	0.206	-0.597056	0.24813	0.0162804	0.1922	-0.6056	0.138	1.142e-05
6	150079835	rs10872648	A	G	PCMT1	0.814	0.61727	0.166102	0.000206524	0.794	0.597056	0.24813	0.0162804	0.8078	0.611	0.138	9.569e-06
6	150080017	rs11155679	C	T	PCMT1	0.186	-0.61727	0.166102	0.000206524	0.206	-0.597056	0.24813	0.0162804	0.1922	-0.611	0.138	9.569e-06
6	150081467	rs2065663	A	G	PCMT1	0.801	0.612842	0.162276	0.000162614	0.774	0.513119	0.240019	0.0327478	0.7925	0.5816	0.1344	1.519e-05
6	150082511	rs12205092	G	T	PCMT1	0.796	0.633917	0.159883	7.54249e-05	0.771	0.486887	0.238947	0.0418224	0.7883	0.5884	0.1329	9.493e-06
6	150089409	rs10872651	A	T	PCMT1	0.796	0.634831	0.159909	7.38513e-05	0.772	0.484537	0.239493	0.0432933	0.7886	0.5885	0.133	9.641e-06
6	150093682	rs3805749	C	T	PCMT1	0.796	0.634831	0.159909	7.38513e-05	0.774	0.462563	0.239758	0.0539483	0.7892	0.5818	0.133	1.224e-05
6	150096391	rs9505972	A	C	PCMT1	0.796	0.634831	0.159909	7.38513e-05	0.774	0.475472	0.240181	0.0479895	0.7892	0.5859	0.1331	1.074e-05
6	150116626	rs3805752	C	T	PCMT1	0.796	0.642178	0.160158	6.25331e-05	0.777	0.425891	0.241402	0.0779658	0.7902	0.5761	0.1335	1.585e-05
6	150121693	rs12176034	C	T	PCMT1	0.803	0.677294	0.162733	3.25804e-05	0.78	0.457335	0.243168	0.0602683	0.7959	0.6093	0.1352	6.64e-06
6	150137231	rs56103941	A	G		0.791	0.634133	0.15858	6.54416e-05	0.772	0.390679	0.24057	0.104665	0.7852	0.5604	0.1324	2.311e-05
6	150138403	rs12210605	A	G		0.793	0.653695	0.15903	4.07098e-05	0.774	0.36305	0.241033	0.132292	0.7872	0.5655	0.1327	2.04e-05
6	150138662	rs9371199	A	T		0.793	0.653695	0.15903	4.07098e-05	0.774	0.36305	0.241033	0.132292	0.7872	0.5655	0.1327	2.04e-05
6	150145001	rs9371201	C	T	LRP11	0.813	0.669139	0.165876	5.64359e-05	0.796	0.519653	0.250511	0.0382743	0.8078	0.6236	0.1383	6.523e-06
6	150153226	rs9371486	C	T	LRP11	0.19	-0.648663	0.163887	7.76251e-05	0.206	-0.440589	0.248061	0.0759837	0.1949	-0.5854	0.1367	1.857e-05
6	150154500	rs7740784	C	T	LRP11	0.791	0.609523	0.158914	0.000128274	0.774	0.36305	0.241033	0.132292	0.7858	0.5348	0.1327	5.547e-05
6	154101424	rs115056150	C	T		0.962	-0.0466452	0.340195	0.890952	0.957	-1.94411	0.49206	8.27308e-05	0.9604	-0.6603	0.2798	0.01829
6	154134408	rs115191188	A	G		0.037	-0.114055	0.341321	0.738288	0.043	1.99578	0.489243	4.83832e-05	0.039	0.5767	0.2799	0.0394
6	154134695		G	T		0.959	-0.0197195	0.325841	0.951747	0.957	-1.99578	0.489243	4.83832e-05	0.9584	-0.6269	0.2712	0.0208
6	154135067	rs115818928	A	G		0.037	-0.114055	0.341321	0.738288	0.043	1.99578	0.489243	4.83832e-05	0.039	0.5767	0.2799	0.0394
6	154136227	rs6910362	C	T		0.959	-0.0197195	0.325841	0.951747	0.957	-1.99578	0.489243	4.83832e-05	0.9584	-0.6269	0.2712	0.0208
6	154138287	rs79030383	G	T		0.959	0.00837048	0.327178	0.979591	0.957	-1.99578	0.489243	4.83832e-05	0.9584	-0.6109	0.272	0.02468
6	154141779	rs78394879	C	T		0.041	0.0184597	0.327911	0.955111	0.043	2.03233	0.486858	3.22081e-05	0.0416	0.6469	0.272	0.01738
6	154143814	rs78867169	C	T		0.041	0.0513933	0.327315	0.875246	0.043	2.03233	0.486858	3.22081e-05	0.0416	0.668	0.2716	0.01392
6	154147200	rs115007216	C	T		0.959	-0.0513933	0.327315	0.875246	0.957	-1.98346	0.487332	5.03229e-05	0.9584	-0.652	0.2717	0.01641
6	159527811	rs9457549	C	G		0.059	1.21428	0.27274	8.86249e-06	NA	NA	NA	NA	0.059	1.2143	0.2727	8.501e-06
6	159527958	rs9457550	G	T		0.941	-1.21428	0.27274	8.86249e-06	NA	NA	NA	NA	0.941	-1.2143	0.2727	8.501e-06
6	159538668	rs116580829	A	G		0.059	1.21251	0.274414	1.03469e-05	NA	NA	NA	NA	0.059	1.2125	0.2744	9.937e-06
6	161998406	rs2143742	A	T	PARK2	0.886	0.837	0.207162	5.49371e-05	0.853	-0.132702	0.292069	0.649666	0.875	0.5124	0.169	0.002424
6	162009418	rs398003238	C	CA	PARK2	0.872	0.788249	0.197199	6.58867e-05	0.846	-0.233389	0.2851	0.413177	0.8636	0.4576	0.1622	0.004776
6	162012307	rs6940957	C	T	PARK2	0.115	-0.852148	0.206507	3.80024e-05	0.139	0.171857	0.29889	0.565419	0.1228	-0.5213	0.1699	0.002154
6	162015765	rs398003239	C	CT	PARK2	0.11	-0.853812	0.210182	5.00502e-05	0.132	0.303414	0.306977	0.323174	0.117	-0.4845	0.1734	0.005215
6	162017174	rs742769	C	T	PARK2	0.885	0.846478	0.207102	4.49837e-05	0.864	-0.194928	0.302837	0.51992	0.8783	0.5146	0.1709	0.002609
6	162019444	rs9458312	C	T	PARK2	0.891	0.862395	0.210398	4.27991e-05	0.87	-0.253996	0.308624	0.410687	0.8843	0.5082	0.1738	0.003465
6	162022492	rs9458314	C	T	PARK2	0.115	-0.877155	0.206681	2.27317e-05	0.136	0.195607	0.302842	0.518474	0.1217	-0.5363	0.1707	0.001682
6	162688332	rs377474403	A	ACAGTGGACTCACACACCACACTGGTTCAGTTCAAAGC	PARK2	0.033	-0.879434	0.358829	0.014318	0.025	-2.43734	0.618341	8.59361e-05	0.031	-1.2719	0.3104	4.164e-05
6	162688369	rs533440092	A	C	PARK2	0.032	-0.884426	0.365146	0.0154988	0.024	-2.292	0.633622	0.00031103	0.03	-1.2353	0.3164	9.433e-05
6	168911301	rs2749257	C	T	SMOC2	0.74	-0.594532	0.149649	7.29683e-05	0.751	-0.51722	0.23398	0.027271	0.7432	-0.5721	0.1261	5.682e-06
6	168911665	rs2749259	G	T	SMOC2	0.281	0.566536	0.145436	0.00010051	0.266	0.413369	0.231128	0.0739703	0.2767	0.5231	0.1231	2.142e-05
6	168911731	rs2763230	A	C	SMOC2	0.719	-0.557684	0.145485	0.000129465	0.734	-0.413369	0.231128	0.0739703	0.7233	-0.5167	0.1231	2.707e-05
6	168911757	rs2749261	G	T	SMOC2	0.719	-0.557684	0.145485	0.000129465	0.734	-0.413369	0.231128	0.0739703	0.7233	-0.5167	0.1231	2.707e-05
6	168911893	rs2609321	A	T	SMOC2	0.281	0.557684	0.145485	0.000129465	0.266	0.413369	0.231128	0.0739703	0.2767	0.5167	0.1231	2.707e-05
6	168912117	rs2749262	A	C	SMOC2	0.719	-0.557684	0.145485	0.000129465	0.734	-0.413369	0.231128	0.0739703	0.7233	-0.5167	0.1231	2.707e-05
6	168913546	rs2248785	A	G	SMOC2	0.28	0.561355	0.145263	0.000114099	0.266	0.413369	0.231128	0.0739703	0.276	0.5195	0.123	2.405e-05
6	168914467	rs2248680	A	C	SMOC2	0.28	0.561355	0.145263	0.000114099	0.266	0.413369	0.231128	0.0739703	0.276	0.5195	0.123	2.405e-05
6	168914535	rs2248676	C	G	SMOC2	0.72	-0.561355	0.145263	0.000114099	0.734	-0.413369	0.231128	0.0739703	0.724	-0.5195	0.123	2.405e-05
6	168914795	rs2609324	C	T	SMOC2	0.28	0.561355	0.145263	0.000114099	0.266	0.413369	0.231128	0.0739703	0.276	0.5195	0.123	2.405e-05
6	168914827	rs2609323	C	T	SMOC2	0.28	0.561355	0.145263	0.000114099	0.266	0.413369	0.231128	0.0739703	0.276	0.5195	0.123	2.405e-05
6	168914862	rs2749264	A	T	SMOC2	0.28	0.561355	0.145263	0.000114099	0.266	0.413369	0.231128	0.0739703	0.276	0.5195	0.123	2.405e-05
6	168915041	rs2749265	G	T	SMOC2	0.28	0.561355	0.145263	0.000114099	0.266	0.413369	0.231128	0.0739703	0.276	0.5195	0.123	2.405e-05
6	168915045	rs2763232	A	G	SMOC2	0.72	-0.561355	0.145263	0.000114099	0.734	-0.413369	0.231128	0.0739703	0.724	-0.5195	0.123	2.405e-05
6	168915092	rs4336422	A	G	SMOC2	0.344	0.536401	0.135748	7.9767e-05	0.328	0.324139	0.214867	0.131695	0.3394	0.4758	0.1148	3.378e-05
6	168915232	rs5016787	A	G	SMOC2	0.28	0.561355	0.145263	0.000114099	0.266	0.413369	0.231128	0.0739703	0.276	0.5195	0.123	2.405e-05
6	168915253	rs5016786	C	G	SMOC2	0.28	0.561355	0.145263	0.000114099	0.266	0.413369	0.231128	0.0739703	0.276	0.5195	0.123	2.405e-05
6	168915260	rs5016785	A	C	SMOC2	0.28	0.561355	0.145263	0.000114099	0.266	0.413369	0.231128	0.0739703	0.276	0.5195	0.123	2.405e-05
6	168915371	rs2749267	A	C	SMOC2	0.72	-0.561355	0.145263	0.000114099	0.734	-0.413369	0.231128	0.0739703	0.724	-0.5195	0.123	2.405e-05
6	168915522	rs2763233	C	T	SMOC2	0.72	-0.561355	0.145263	0.000114099	0.734	-0.413369	0.231128	0.0739703	0.724	-0.5195	0.123	2.405e-05
6	168915636	rs2763234	C	T	SMOC2	0.72	-0.561355	0.145263	0.000114099	0.734	-0.413369	0.231128	0.0739703	0.724	-0.5195	0.123	2.405e-05
6	168916081	rs2763235	C	T	SMOC2	0.72	-0.561355	0.145263	0.000114099	0.734	-0.413369	0.231128	0.0739703	0.724	-0.5195	0.123	2.405e-05
6	168916116	rs2609322	C	T	SMOC2	0.28	0.561355	0.145263	0.000114099	0.266	0.413369	0.231128	0.0739703	0.276	0.5195	0.123	2.405e-05
6	168916140	rs869211373	C	CT	SMOC2	0.72	-0.561355	0.145263	0.000114099	0.734	-0.413369	0.231128	0.0739703	0.724	-0.5195	0.123	2.405e-05
6	168916194		A	G	SMOC2	0.28	0.561355	0.145263	0.000114099	0.266	0.413369	0.231128	0.0739703	0.276	0.5195	0.123	2.405e-05
6	168916281	rs539175802	T	TCGCCCTGAGGGGCCGGCTCCTTCCAAGGCC	SMOC2	0.28	0.561355	0.145263	0.000114099	0.266	0.413369	0.231128	0.0739703	0.276	0.5195	0.123	2.405e-05
6	168916291		C	T	SMOC2	0.285	0.536263	0.144683	0.000214579	0.271	0.409153	0.229445	0.0748212	0.281	0.5001	0.1224	4.382e-05
6	168916297	rs9364257	A	G	SMOC2	0.713	-0.520174	0.144167	0.000314255	0.727	-0.388611	0.229092	0.0901058	0.717	-0.4829	0.122	7.581e-05
6	168916422	rs2248421	C	T	SMOC2	0.72	-0.561355	0.145263	0.000114099	0.734	-0.401657	0.231177	0.0825851	0.724	-0.5161	0.123	2.711e-05
6	168916438	rs397837896	A	AAC	SMOC2	0.72	-0.561355	0.145263	0.000114099	0.734	-0.413369	0.231128	0.0739703	0.724	-0.5195	0.123	2.405e-05
6	168916453	rs2763236	A	G	SMOC2	0.72	-0.561355	0.145263	0.000114099	0.734	-0.413369	0.231128	0.0739703	0.724	-0.5195	0.123	2.405e-05
6	168916623	rs2763237	C	T	SMOC2	0.28	0.56376	0.145268	0.000106704	0.266	0.413369	0.231128	0.0739703	0.276	0.5212	0.123	2.261e-05
6	168916713		A	C	SMOC2	0.28	0.56376	0.145268	0.000106704	0.266	0.413369	0.231128	0.0739703	0.276	0.5212	0.123	2.261e-05
6	168916953	rs2248402	A	G	SMOC2	0.279	0.565161	0.145249	0.000102367	0.266	0.413369	0.231128	0.0739703	0.2753	0.5222	0.123	2.175e-05
6	168917182	rs2248397	C	G	SMOC2	0.278	0.556641	0.14584	0.000138374	0.266	0.413369	0.231128	0.0739703	0.2746	0.5158	0.1233	2.886e-05
6	168918741	rs2144747	C	T	SMOC2	0.352	0.489963	0.136798	0.000347726	0.339	0.405757	0.21867	0.0637793	0.3483	0.4663	0.116	5.806e-05
6	168919255	rs2144748	A	G	SMOC2	0.34	0.50497	0.138184	0.000263	0.33	0.394892	0.21955	0.0723449	0.3372	0.4737	0.1169	5.104e-05
6	168923861	rs9295065	C	T	SMOC2	0.662	-0.522083	0.137778	0.000154524	0.672	-0.36046	0.22018	0.101889	0.6648	-0.4766	0.1168	4.491e-05
6	168930976	rs1884475	C	T	SMOC2	0.661	-0.537082	0.137275	9.37184e-05	0.668	-0.349137	0.219439	0.111883	0.663	-0.4842	0.1164	3.173e-05
6	168933229	rs4708473	A	T	SMOC2	0.66	-0.50292	0.137299	0.000254337	0.665	-0.360756	0.218086	0.0983701	0.6614	-0.4626	0.1162	6.859e-05
6	168985327	rs796481401	C	CA	SMOC2	0.256	-0.515662	0.145324	0.000394556	0.284	-0.451908	0.216692	0.0372523	0.2647	-0.4959	0.1207	3.981e-05
6	168985556	rs11964985	C	T	SMOC2	0.256	-0.515662	0.145324	0.000394556	0.284	-0.451908	0.216692	0.0372523	0.2647	-0.4959	0.1207	3.981e-05
6	168985567	rs9688749	C	T	SMOC2	0.744	0.515662	0.145324	0.000394556	0.716	0.451908	0.216692	0.0372523	0.7353	0.4959	0.1207	3.981e-05
6	168987928		A	G	SMOC2	0.563	0.503278	0.128426	9.13019e-05	0.507	0.368537	0.19956	0.0650485	0.5466	0.4638	0.108	1.749e-05
6	168991366	rs4989794	C	T	SMOC2	0.256	-0.493041	0.145393	0.000706644	0.286	-0.4473	0.216288	0.0388632	0.2653	-0.4788	0.1207	7.246e-05
6	168991900	rs57442430	C	T	SMOC2	0.744	0.488741	0.145414	0.000787822	0.714	0.4473	0.216288	0.0388632	0.7347	0.4758	0.1207	8.043e-05
6	169344009	rs7758658	A	G		0.468	-0.154948	0.127154	0.223113	0.461	-0.810028	0.194158	3.25407e-05	0.4659	-0.3516	0.1064	0.0009493
6	169350846	rs2494079	G	T		0.601	0.516751	0.131847	9.11085e-05	0.597	0.11677	0.205927	0.570798	0.5998	0.4005	0.111	0.0003104
7	2962293		C	G	CARD11	0.783	-0.422087	0.154157	0.0062233	0.791	-0.788045	0.254688	0.00202293	0.7851	-0.5202	0.1319	7.995e-05
7	4240540	rs78600678	C	T	SDK1	0.962	-1.34756	0.331309	4.89678e-05	NA	NA	NA	NA	0.962	-1.3476	0.3313	4.754e-05
7	6078468	rs2302330	A	C	EIF2AK1	0.352	-0.265538	0.137977	0.0544008	0.334	-0.819811	0.20803	8.62574e-05	0.3465	-0.4349	0.115	0.0001556
7	6082906	rs10224611	C	T	EIF2AK1	0.648	0.262621	0.138039	0.0572154	0.666	0.819811	0.20803	8.62574e-05	0.6535	0.433	0.115	0.0001671
7	6083142	rs10224954	C	G	EIF2AK1	0.648	0.262621	0.138039	0.0572154	0.666	0.819811	0.20803	8.62574e-05	0.6535	0.433	0.115	0.0001671
7	6650768	rs113834788	G	GA		0.858	0.770088	0.181521	2.28906e-05	0.862	-0.419143	0.286998	0.144452	0.8591	0.4303	0.1534	0.005035
7	6757505	rs201755692	G	T		0.269	-0.0917451	0.150319	0.541694	0.266	-0.95232	0.222901	2.099e-05	0.2681	-0.3608	0.1246	0.003794
7	6757506	rs200041305	C	G		0.269	-0.0917451	0.150319	0.541694	0.266	-0.95232	0.222901	2.099e-05	0.2681	-0.3608	0.1246	0.003794
7	6757507	rs200970258	C	T		0.731	0.095194	0.150336	0.526653	0.734	0.95232	0.222901	2.099e-05	0.7319	0.3632	0.1246	0.003569
7	7669984	rs79736411	C	G		0.079	-0.874483	0.236068	0.000216359	0.086	-0.765659	0.357962	0.0326575	0.0811	-0.8415	0.1971	1.955e-05
7	7670942	rs111338072	G	T		0.079	-0.880722	0.23621	0.000196721	0.086	-0.765659	0.357962	0.0326575	0.0811	-0.8458	0.1972	1.786e-05
7	7930676	rs11973960	G	T	RPA3-AS1	0.823	0.676511	0.167203	5.36174e-05	NA	NA	NA	NA	0.823	0.6765	0.1672	5.209e-05
7	7932137	rs112062145	C	T	RPA3-AS1	0.057	-1.14529	0.278174	3.95595e-05	NA	NA	NA	NA	0.057	-1.1453	0.2782	3.836e-05
7	7932170	rs112924659	A	G	RPA3-AS1	0.943	1.14529	0.278174	3.95595e-05	NA	NA	NA	NA	0.943	1.1453	0.2782	3.836e-05
7	7935571	rs41370848	C	T	RPA3-AS1	0.943	1.15059	0.279628	3.99781e-05	NA	NA	NA	NA	0.943	1.1506	0.2796	3.876e-05
7	9849038	rs113984558	C	T		0.025	1.46653	0.418913	0.000471716	0.023	1.19269	0.672567	0.0764456	0.0244	1.39	0.3556	9.265e-05
7	9850160	rs73675505	A	G		0.023	1.51902	0.433404	0.000464627	0.023	1.19269	0.672567	0.0764456	0.023	1.4233	0.3643	9.356e-05
7	9851638	rs34288643	C	CA		0.097	0.709255	0.215392	0.00100514	0.114	0.887688	0.316764	0.00516094	0.1024	0.7657	0.1781	1.718e-05
7	9853171	rs10247736	G	T		0.1	0.710668	0.211616	0.00079565	0.117	0.925181	0.312954	0.00317931	0.1053	0.778	0.1753	9.083e-06
7	9853380		A	T		0.1	0.710668	0.211616	0.00079565	0.117	0.925181	0.312954	0.00317931	0.1053	0.778	0.1753	9.083e-06
7	9853381	rs10232448	C	G		0.9	-0.710668	0.211616	0.00079565	0.883	-0.925181	0.312954	0.00317931	0.8947	-0.778	0.1753	9.083e-06
7	9855280	rs34588366	C	G		0.1	0.710668	0.211616	0.00079565	0.117	0.925181	0.312954	0.00317931	0.1053	0.778	0.1753	9.083e-06
7	9855680	rs77280926	C	T		0.033	1.05092	0.365116	0.00403093	0.028	1.73052	0.614331	0.00493428	0.0317	1.2283	0.3139	9.097e-05
7	9856494	rs80087616	G	T		0.033	1.07536	0.366156	0.00334441	0.028	1.73052	0.614331	0.00493428	0.0317	1.2471	0.3145	7.34e-05
7	9858097	rs10256508	C	G		0.099	0.736737	0.214292	0.000595292	0.115	0.91697	0.312671	0.00342898	0.1041	0.7943	0.1768	6.995e-06
7	9858697	rs12702945	A	G		0.098	0.747418	0.214635	0.000505441	0.115	0.877817	0.312993	0.00512568	0.1034	0.7891	0.177	8.272e-06
7	9860132	rs13232492	C	G		0.895	-0.79041	0.20737	0.000141297	0.875	-0.965252	0.300415	0.00135095	0.8885	-0.8468	0.1707	6.973e-07
7	9862339	rs28877697	A	G		0.102	0.745525	0.211213	0.000423258	0.123	0.868498	0.305094	0.00449921	0.1088	0.7854	0.1737	6.113e-06
7	9863318	rs73675518	A	G		0.963	-1.11236	0.346902	0.00135972	0.965	-1.70148	0.55486	0.00221806	0.9636	-1.2779	0.2941	1.396e-05
7	9863846	rs28401300	C	T		0.897	-0.749577	0.210374	0.000373178	0.876	-0.873991	0.302997	0.00399602	0.8902	-0.79	0.1728	4.834e-06
7	9863874	rs73675522	A	C		0.963	-1.13616	0.345225	0.00101154	0.965	-1.5566	0.541968	0.00415456	0.9636	-1.2575	0.2912	1.569e-05
7	9867749	rs726262	C	T		0.121	0.676955	0.195493	0.000543263	0.137	0.777608	0.289156	0.00726862	0.126	0.7085	0.162	1.215e-05
7	9868409	rs1639735	A	G		0.116	0.698623	0.200309	0.000495277	0.132	0.694743	0.29368	0.0181691	0.1211	0.6974	0.1655	2.505e-05
7	9870197	rs1709592	C	T		0.103	0.764371	0.20921	0.000263736	0.122	0.590423	0.302178	0.0509639	0.1092	0.708	0.172	3.853e-05
7	9873269	rs7797454	A	T		0.106	0.745489	0.207724	0.000338334	0.124	0.8331	0.303132	0.00608717	0.1118	0.7735	0.1714	6.362e-06
7	9873423	rs543589054	C	CATT		0.106	0.745489	0.207724	0.000338334	0.124	0.8331	0.303132	0.00608717	0.1118	0.7735	0.1714	6.362e-06
7	9877133	rs10278403	A	T		0.893	-0.781176	0.207086	0.000165429	0.875	-0.838356	0.301203	0.00547094	0.8872	-0.7995	0.1706	2.795e-06
7	9877910	rs71534688	A	T		0.109	0.772265	0.204048	0.000157382	0.128	0.86123	0.298116	0.0039407	0.1151	0.8006	0.1684	1.985e-06
7	9878893	rs398003636	G	GA		0.112	0.654283	0.201715	0.00119532	0.131	0.819651	0.294969	0.00554824	0.1181	0.707	0.1665	2.176e-05
7	11053572	rs115480512	A	G	PHF14	0.986	-2.11121	0.529091	6.78375e-05	NA	NA	NA	NA	0.986	-2.1112	0.5291	6.6e-05
7	15144112	rs74605809	C	T		0.021	1.95963	0.443201	1.02049e-05	NA	NA	NA	NA	0.021	1.9596	0.4432	9.8e-06
7	15144127	rs148836578	T	TTTTC		0.021	1.95963	0.443201	1.02049e-05	NA	NA	NA	NA	0.021	1.9596	0.4432	9.8e-06
7	15187909	rs115030349	C	T		0.021	2.00551	0.447238	7.63836e-06	0.019	1.91868	0.733302	0.00900392	0.0205	1.982	0.3818	2.094e-07
7	15212778	rs6948957	A	G		0.979	-1.98624	0.447211	9.31431e-06	0.98	-1.93897	0.725456	0.00763289	0.9793	-1.9732	0.3807	2.18e-07
7	15217329	rs73275316	C	T		0.021	1.94447	0.445301	1.31147e-05	0.02	1.93897	0.725456	0.00763289	0.0207	1.943	0.3795	3.061e-07
7	15230941	rs73275379	C	T		0.024	1.50766	0.418732	0.000323543	0.02	1.74817	0.726388	0.0162612	0.023	1.5676	0.3628	1.551e-05
7	15232333	rs58465562	C	T		0.977	-1.43956	0.424805	0.000712664	0.98	-1.74817	0.726388	0.0162612	0.9778	-1.5182	0.3667	3.47e-05
7	15238396	rs113916621	C	G		0.023	1.43956	0.424805	0.000712664	0.02	1.74817	0.726388	0.0162612	0.0222	1.5182	0.3667	3.47e-05
7	15922197	rs113747646	G	T		0.04	0.190158	0.335788	0.571238	0.039	-2.02366	0.492627	4.285e-05	0.0397	-0.5121	0.2775	0.06493
7	15928395	rs145488324	G	T		0.034	0.204061	0.36456	0.575701	0.033	-2.18824	0.542525	5.87134e-05	0.0337	-0.5401	0.3026	0.07426
7	17369834	rs369800258	G	GC	AHR	0.014	-1.93715	0.553768	0.000476462	0.013	-1.79929	0.877605	0.0405756	0.0137	-1.8979	0.4683	5.068e-05
7	17388070	rs192239514	A	G		0.988	2.02924	0.582193	0.000499385	0.987	1.79929	0.877605	0.0405756	0.9877	1.959	0.4851	5.393e-05
7	17587599	rs140169023	A	G		0.033	1.56018	0.355572	1.19103e-05	NA	NA	NA	NA	0.033	1.5602	0.3556	1.145e-05
7	17606398	rs9690706	C	T		0.788	-0.655355	0.15965	4.16975e-05	0.799	-0.0960922	0.24745	0.697846	0.7912	-0.491	0.1342	0.0002524
7	19282573	rs34708739	C	G		0.038	-0.52995	0.33548	0.114304	0.052	1.82443	0.447856	4.95505e-05	0.043	0.3163	0.2685	0.2388
7	19317210	rs35977775	C	T		0.963	0.418328	0.340627	0.219518	0.947	-1.79565	0.446474	6.16326e-05	0.9571	-0.3962	0.2708	0.1434
7	20212351	rs10085691	C	T	MACC1	0.875	0.746606	0.189931	8.68407e-05	0.875	0.663891	0.296766	0.0254781	0.875	0.7226	0.16	6.277e-06
7	21756055	rs75602313	A	G	DNAH11	0.877	0.616853	0.194307	0.00151793	0.891	0.837925	0.318757	0.00868845	0.8808	0.6767	0.1659	4.524e-05
7	22720089	rs34775303	A	G		0.232	-0.545551	0.151488	0.00032264	0.22	-0.610815	0.238091	0.0104336	0.2285	-0.5644	0.1278	1.007e-05
7	22722002	rs397764552	G	GGGA		0.769	0.519369	0.151889	0.00063734	0.781	0.603388	0.23833	0.0114867	0.7725	0.5436	0.1281	2.193e-05
7	22722537	rs6969856	A	G		0.231	-0.519369	0.151889	0.00063734	0.219	-0.603388	0.23833	0.0114867	0.2275	-0.5436	0.1281	2.193e-05
7	22722925	rs13225099	A	G		0.231	-0.519369	0.151889	0.00063734	0.219	-0.603388	0.23833	0.0114867	0.2275	-0.5436	0.1281	2.193e-05
7	22723960	rs35610974	A	G		0.228	-0.513936	0.152686	0.000773928	0.216	-0.659103	0.237333	0.00557629	0.2245	-0.5564	0.1284	1.469e-05
7	22724533	rs6980465	C	T		0.772	0.489777	0.152587	0.00134443	0.785	0.650337	0.237552	0.00628629	0.7758	0.5367	0.1284	2.912e-05
7	22724643	rs6942567	A	C		0.227	-0.494471	0.152563	0.00120586	0.215	-0.650337	0.237552	0.00628629	0.2235	-0.54	0.1284	2.593e-05
7	22724644	rs6942430	A	G		0.773	0.494471	0.152563	0.00120586	0.785	0.650337	0.237552	0.00628629	0.7765	0.54	0.1284	2.593e-05
7	22728272	rs34929064	C	T		0.237	-0.541204	0.150152	0.000318816	0.221	-0.480076	0.233156	0.0397234	0.2323	-0.5233	0.1262	3.395e-05
7	26023090	rs6947773	A	G		0.233	-0.0976633	0.156405	0.532403	0.25	0.959053	0.230302	3.3639e-05	0.2384	0.2359	0.1294	0.0683
7	26026149	rs6964512	G	T		0.232	-0.103495	0.156692	0.508993	0.25	0.984844	0.23081	2.15046e-05	0.2377	0.2399	0.1296	0.06429
7	26026776	rs6978844	A	G		0.768	0.0984411	0.156295	0.528855	0.75	-0.984844	0.23081	2.15046e-05	0.7623	-0.2421	0.1294	0.06135
7	26030166	rs766838	C	T		0.766	0.104709	0.156055	0.502294	0.75	-0.981799	0.230741	2.26622e-05	0.761	-0.2363	0.1293	0.06756
7	26033817	rs6461903	A	G		0.235	-0.16594	0.155372	0.285613	0.25	0.993166	0.230752	1.82453e-05	0.2397	0.1956	0.1289	0.129
7	26034599	rs2893234	G	T		0.767	0.102936	0.156128	0.509757	0.751	-0.996663	0.230713	1.69999e-05	0.762	-0.2425	0.1293	0.06078
7	27178790	rs17471520	C	T	HOXA3	0.309	0.144405	0.139851	0.301903	0.289	-0.879526	0.217072	5.43558e-05	0.3031	-0.1559	0.1176	0.1847
7	28244331	rs57688230	G	T		0.745	-0.576606	0.147917	9.93904e-05	0.766	0.00211384	0.23895	0.992943	0.7508	-0.4163	0.1258	0.0009335
7	29823830	rs78749932	C	T		0.977	1.88841	0.429253	1.13005e-05	0.978	-0.158302	0.689083	0.818345	0.9773	1.3162	0.3643	0.0003031
7	29824999	rs188907492	C	T		0.976	1.7414	0.42239	3.86249e-05	0.977	0.056584	0.675791	0.933286	0.9763	1.2681	0.3582	0.0003995
7	29826263	rs140382187	C	G		0.022	-1.81959	0.436458	3.16024e-05	0.022	0.158302	0.689083	0.818345	0.022	-1.2533	0.3687	0.0006762
7	29863400	rs115991185	C	T	WIPF3	0.043	-1.23774	0.317008	9.68589e-05	0.041	0.254819	0.498795	0.609545	0.0424	-0.8083	0.2675	0.002518
7	29871383	rs79321569	A	T	WIPF3	0.958	1.26625	0.320106	7.83558e-05	0.959	-0.254819	0.498795	0.609545	0.9583	0.8225	0.2694	0.002264
7	29885516	rs78304992	A	G	WIPF3	0.958	1.26211	0.319799	8.13948e-05	0.959	-0.108662	0.495611	0.826497	0.9583	0.8591	0.2687	0.001387
7	29886127	rs145631414	A	G	WIPF3	0.042	-1.26211	0.319799	8.13948e-05	0.041	0.108662	0.495611	0.826497	0.0417	-0.8591	0.2687	0.001387
7	31491404	rs218108	A	T		0.015	-1.99565	0.512408	0.000100837	NA	NA	NA	NA	0.015	-1.9956	0.5124	9.834e-05
7	34543108	rs10271519	A	G		0.138	0.714991	0.183109	9.67512e-05	0.145	-0.161697	0.285933	0.571843	0.14	0.46	0.1542	0.002852
7	35984028	rs17172526	A	G		0.386	0.577642	0.135181	1.99745e-05	0.373	0.104409	0.210367	0.619767	0.3822	0.4393	0.1137	0.0001119
7	38918012	rs2392604	C	T	VPS41	0.174	0.123112	0.173075	0.47695	0.193	1.0081	0.253271	7.32723e-05	0.18	0.4048	0.1429	0.004611
7	38956977	rs6946490	A	G	VPS41	0.804	-0.0749205	0.165562	0.650932	0.792	-0.966304	0.244326	8.13712e-05	0.8002	-0.3554	0.1371	0.009508
7	38957077	rs6946375	C	T	VPS41	0.196	0.0749205	0.165562	0.650932	0.209	0.98426	0.244138	5.9175e-05	0.2001	0.3614	0.137	0.008357
7	38957186	rs6946652	A	C	VPS41	0.804	-0.0749205	0.165562	0.650932	0.791	-0.98426	0.244138	5.9175e-05	0.7999	-0.3614	0.137	0.008357
7	39173488	rs10230421	C	G	POU6F2	0.169	0.67427	0.170575	7.92755e-05	0.166	-0.356566	0.264889	0.178546	0.1681	0.3721	0.1434	0.009468
7	39191427	rs73695675	G	T	POU6F2	0.889	-0.812802	0.203094	6.4552e-05	0.888	0.447863	0.31189	0.151294	0.8887	-0.4374	0.1702	0.01017
7	40333942	rs17171670	G	T	SUGCT	0.21	0.638536	0.160839	7.38209e-05	0.199	0.0313365	0.248486	0.899668	0.2068	0.4593	0.135	0.0006706
7	40334094	rs17171671	A	G	SUGCT	0.79	-0.638536	0.160839	7.38209e-05	0.801	-0.0313365	0.248486	0.899668	0.7932	-0.4593	0.135	0.0006706
7	40342862	rs112588212	A	G	SUGCT	0.79	-0.637241	0.160771	7.58106e-05	0.801	-0.0313365	0.248486	0.899668	0.7932	-0.4584	0.135	0.0006829
7	40347414	rs58458881	A	AT	SUGCT	0.596	0.573094	0.13427	2.04141e-05	0.591	-0.209191	0.202681	0.302239	0.5945	0.3345	0.1119	0.002806
7	40348099	rs10270438	A	G	SUGCT	0.596	0.573094	0.13427	2.04141e-05	0.59	-0.222987	0.202756	0.271665	0.5942	0.3304	0.1119	0.003163
7	40349388	rs61287506	C	CGATGTGTGGTGTGTGAGA	SUGCT	0.608	0.548739	0.135182	5.0689e-05	0.597	-0.251195	0.203178	0.216596	0.6046	0.3033	0.1125	0.007044
7	40358485	rs10231582	A	G	SUGCT	0.591	0.560421	0.13406	3.00714e-05	0.586	-0.20864	0.202859	0.303941	0.5895	0.3266	0.1118	0.003494
7	40359870	rs10265895	A	G	SUGCT	0.408	-0.559853	0.133782	2.94953e-05	0.414	0.195748	0.202881	0.334834	0.4098	-0.3309	0.1117	0.003052
7	48756066	rs10247155	G	T		0.981	-1.87638	0.478073	8.9043e-05	NA	NA	NA	NA	0.981	-1.8764	0.4781	8.678e-05
7	50586401	rs113215119	C	T	DDC	0.983	-2.05473	0.505233	4.90674e-05	0.983	0.959492	0.740736	0.195477	0.983	-1.0977	0.4174	0.008541
7	55087139	rs17335738	G	T	EGFR	0.841	-0.0612917	0.174034	0.72473	0.844	1.06017	0.26922	8.72981e-05	0.8419	0.2692	0.1462	0.06547
7	55456430	rs6962424	A	G	LANCL2	0.037	1.35435	0.343289	8.18483e-05	0.039	0.141644	0.518826	0.784897	0.0376	0.9851	0.2863	0.0005799
7	55458264	rs7788944	A	C	LANCL2	0.962	-1.39434	0.342409	4.79811e-05	0.961	-0.141644	0.518826	0.784897	0.9617	-1.0143	0.2858	0.0003866
7	55462742	rs116099913	A	T	LANCL2	0.962	-1.39434	0.342409	4.79811e-05	0.961	-0.141644	0.518826	0.784897	0.9617	-1.0143	0.2858	0.0003866
7	55463422	rs115657409	A	T	LANCL2	0.962	-1.39434	0.342409	4.79811e-05	0.961	-0.141644	0.518826	0.784897	0.9617	-1.0143	0.2858	0.0003866
7	55464076	rs115015163	C	T	LANCL2	0.962	-1.39434	0.342409	4.79811e-05	0.961	-0.141644	0.518826	0.784897	0.9617	-1.0143	0.2858	0.0003866
7	55464488	rs115016077	G	T	LANCL2	0.962	-1.39434	0.342409	4.79811e-05	0.961	-0.141644	0.518826	0.784897	0.9617	-1.0143	0.2858	0.0003866
7	55469414	rs13225538	A	G	LANCL2	0.037	1.38914	0.343159	5.31585e-05	0.039	0.0570699	0.528053	0.913955	0.0376	0.9936	0.2877	0.000554
7	55482701	rs537598387	A	G	LANCL2	0.962	-1.3275	0.339774	9.58392e-05	0.961	-0.218927	0.516234	0.671585	0.9617	-0.9924	0.2838	0.000471
7	55482733		A	T	LANCL2	0.962	-1.3275	0.339774	9.58392e-05	0.961	-0.218927	0.516234	0.671585	0.9617	-0.9924	0.2838	0.000471
7	55538647	rs185438958	C	T	VOPP1	0.026	1.71369	0.416598	4.0185e-05	0.03	0.302907	0.592091	0.60904	0.0273	1.2465	0.3407	0.0002536
7	55548050	rs7802810	C	T	VOPP1	0.026	1.66443	0.416473	6.60895e-05	NA	NA	NA	NA	0.026	1.6644	0.4165	6.429e-05
7	55585471	rs6975991	A	G	VOPP1	0.974	-1.68995	0.412609	4.33736e-05	NA	NA	NA	NA	0.974	-1.6899	0.4126	4.208e-05
7	55590515	rs139351586	C	T	VOPP1	0.974	-1.68995	0.412609	4.33736e-05	NA	NA	NA	NA	0.974	-1.6899	0.4126	4.208e-05
7	55592314	rs143516618	A	C	VOPP1	0.026	1.68995	0.412609	4.33736e-05	NA	NA	NA	NA	0.026	1.6899	0.4126	4.208e-05
7	55599556	rs145315614	C	T	VOPP1	0.973	-1.71679	0.409707	2.87972e-05	NA	NA	NA	NA	0.973	-1.7168	0.4097	2.786e-05
7	55600353	rs201714906	T	TG	VOPP1	0.027	1.64405	0.411205	6.56383e-05	NA	NA	NA	NA	0.027	1.644	0.4112	6.385e-05
7	69043696	rs182719138	C	T		0.987	-2.43257	0.565519	1.75962e-05	NA	NA	NA	NA	0.987	-2.4326	0.5655	1.697e-05
7	71021468		G	T	WBSCR17	0.835	-0.699807	0.172475	5.10837e-05	0.838	0.0675736	0.266981	0.800236	0.8359	-0.4738	0.1449	0.001072
7	77812483	rs12705320	C	T	MAGI2	0.747	0.577459	0.147858	9.64429e-05	0.724	0.177617	0.221252	0.422272	0.7399	0.454	0.1229	0.0002214
7	80933490	rs115681421	C	T		0.044	-1.23516	0.316106	9.56847e-05	NA	NA	NA	NA	0.044	-1.2352	0.3161	9.329e-05
7	81012809	rs67715543	A	T		0.14	-0.721421	0.183132	8.38702e-05	0.123	0.15598	0.297542	0.600223	0.1353	-0.4804	0.156	0.00207
7	81021962	rs10486822	A	T		0.138	-0.729498	0.186116	9.1007e-05	0.118	0.122525	0.302486	0.68551	0.1325	-0.4955	0.1585	0.001772
7	82392004	rs116294258	A	T	PCLO	0.055	0.824765	0.2825	0.00353598	0.041	1.41904	0.510148	0.00549997	0.0517	0.9642	0.2471	9.556e-05
7	82394712	rs763296	G	T	PCLO	0.356	0.527305	0.133493	8.02267e-05	0.35	0.197104	0.208186	0.343962	0.3543	0.4311	0.1124	0.0001249
7	82396430	rs75066840	A	C	PCLO	0.051	1.00973	0.295239	0.000635869	0.035	1.8558	0.544368	0.000675102	0.0474	1.202	0.2595	3.628e-06
7	82401308	rs78009332	A	G	PCLO	0.944	-0.833925	0.280839	0.00301126	0.957	-1.43847	0.498924	0.00401285	0.9471	-0.9794	0.2447	6.284e-05
7	82404201	rs77161374	A	G	PCLO	0.056	0.833925	0.280839	0.00301126	0.043	1.43847	0.498924	0.00401285	0.0529	0.9794	0.2447	6.284e-05
7	82404313	rs114036361	C	T	PCLO	0.056	0.833925	0.280839	0.00301126	0.043	1.43847	0.498924	0.00401285	0.0529	0.9794	0.2447	6.284e-05
7	82405163	rs115309551	C	T	PCLO	0.944	-0.816677	0.28128	0.00372235	0.957	-1.43847	0.498924	0.00401285	0.9471	-0.9666	0.245	7.977e-05
7	82405576	rs78101798	C	G	PCLO	0.944	-0.812886	0.280812	0.00382623	0.957	-1.43847	0.498924	0.00401285	0.9471	-0.9634	0.2447	8.258e-05
7	82407432	rs116805810	A	G	PCLO	0.055	0.832883	0.284375	0.00343235	0.044	1.37993	0.497002	0.00558676	0.0523	0.9678	0.2468	8.818e-05
7	82407466	rs114949083	C	T	PCLO	0.945	-0.832883	0.284375	0.00343235	0.956	-1.37993	0.497002	0.00558676	0.9477	-0.9678	0.2468	8.818e-05
7	82433922	rs6467913	A	C	PCLO	0.749	0.700571	0.148564	2.53802e-06	0.73	-0.265953	0.227924	0.243521	0.7433	0.4124	0.1245	0.0009219
7	82435381	rs13235048	A	C	PCLO	0.749	0.700571	0.148564	2.53802e-06	0.73	-0.287004	0.227886	0.208144	0.7433	0.406	0.1245	0.001104
7	82444112	rs2214414	C	T	PCLO	0.315	-0.714857	0.138242	2.50608e-07	0.326	0.1437	0.214329	0.5027	0.3182	-0.4626	0.1162	6.83e-05
7	82444372	rs2189246	A	G	PCLO	0.685	0.710833	0.13826	2.93325e-07	0.674	-0.1437	0.214329	0.5027	0.6818	0.4597	0.1162	7.593e-05
7	82444389	rs114032778	G	T	PCLO	0.059	0.8619	0.277134	0.00189096	0.049	1.39528	0.474868	0.00336879	0.0565	0.9974	0.2394	3.085e-05
7	82444418	rs3064840	T	TCTTAAGAA	PCLO	0.315	-0.710833	0.13826	2.93325e-07	0.326	0.1437	0.214329	0.5027	0.3182	-0.4597	0.1162	7.593e-05
7	82448405	rs2715147	C	T	PCLO	0.32	-0.725175	0.137682	1.50091e-07	0.328	0.143182	0.214459	0.504498	0.3223	-0.4717	0.1159	4.67e-05
7	82448801	rs3064870	A	AAAGT	PCLO	0.207	-0.648479	0.158377	4.36038e-05	NA	NA	NA	NA	0.207	-0.6485	0.1584	4.23e-05
7	82450035	rs2715148	A	C	PCLO	0.316	-0.717503	0.138821	2.53943e-07	0.326	0.136994	0.21505	0.524234	0.3189	-0.4662	0.1166	6.417e-05
7	82455305	rs2189248	C	T	PCLO	0.797	0.665578	0.159448	3.08839e-05	NA	NA	NA	NA	0.797	0.6656	0.1594	2.989e-05
7	82456663	rs2715151	C	G	PCLO	0.319	-0.731495	0.137537	1.13584e-07	0.326	0.121796	0.214493	0.570264	0.321	-0.4829	0.1158	3.037e-05
7	82457144	rs17156728	C	T	PCLO	0.941	-0.8619	0.277134	0.00189096	0.952	-1.33752	0.477651	0.00519533	0.9438	-0.9817	0.2397	4.216e-05
7	82457494	rs2371215	A	T	PCLO	0.684	0.734862	0.13813	1.12632e-07	0.674	-0.126306	0.21443	0.555959	0.6811	0.4823	0.1161	3.275e-05
7	82457498	rs397757472	A	AT	PCLO	0.316	-0.734862	0.13813	1.12632e-07	0.326	0.126306	0.21443	0.555959	0.3189	-0.4823	0.1161	3.275e-05
7	82457579	rs116195559	A	T	PCLO	0.059	0.8619	0.277134	0.00189096	0.048	1.33752	0.477651	0.00519533	0.0562	0.9817	0.2397	4.216e-05
7	82457858	rs2715153	C	T	PCLO	0.316	-0.737029	0.138097	1.02695e-07	0.325	0.123331	0.214809	0.565987	0.3186	-0.4854	0.1162	2.93e-05
7	82460866	rs2715154	G	T	PCLO	0.319	-0.723986	0.137536	1.5258e-07	0.327	0.11774	0.215025	0.584099	0.3213	-0.4796	0.1159	3.482e-05
7	82466052	rs78508498	C	T	PCLO	0.942	-0.838103	0.278037	0.00260031	0.951	-1.35761	0.475755	0.00440272	0.9443	-0.9704	0.24	5.292e-05
7	82468374		A	G	PCLO	0.317	-0.719391	0.137984	1.99869e-07	0.324	0.0953789	0.216458	0.659564	0.319	-0.484	0.1164	3.19e-05
7	82469606	rs2715158	C	G	PCLO	0.236	0.636628	0.150319	2.36369e-05	0.242	0.193817	0.232479	0.40463	0.2378	0.5061	0.1262	6.094e-05
7	82471054	rs76542465	C	G	PCLO	0.057	0.871695	0.281126	0.00195131	0.048	1.33752	0.477651	0.00519533	0.0547	0.9915	0.2423	4.266e-05
7	82471408	rs2715159	A	G	PCLO	0.695	-0.564862	0.138351	4.5845e-05	0.699	-0.211915	0.212581	0.319044	0.6962	-0.4598	0.116	7.318e-05
7	82471496	rs2522835	A	T	PCLO	0.684	0.710265	0.137988	2.84161e-07	0.676	-0.0932933	0.216454	0.666546	0.6817	0.4781	0.1164	3.98e-05
7	82472861	rs189324054	A	T	PCLO	0.943	-0.871695	0.281126	0.00195131	0.952	-1.33752	0.477651	0.00519533	0.9453	-0.9915	0.2423	4.266e-05
7	82473231	rs77138154	C	G	PCLO	0.943	-0.871695	0.281126	0.00195131	0.952	-1.33752	0.477651	0.00519533	0.9453	-0.9915	0.2423	4.266e-05
7	82475316	rs397935285	C	CA	PCLO	0.695	-0.555843	0.138228	5.95624e-05	0.699	-0.214683	0.213007	0.313737	0.6962	-0.4547	0.116	8.788e-05
7	82475382	rs2522837	A	G	PCLO	0.762	-0.687946	0.150325	4.95449e-06	0.757	-0.210322	0.233473	0.367868	0.7605	-0.548	0.1264	1.454e-05
7	82475557	rs2522838	A	T	PCLO	0.238	0.687946	0.150325	4.95449e-06	0.243	0.210322	0.233473	0.367868	0.2395	0.548	0.1264	1.454e-05
7	82475786	rs35972711	T	TTA	PCLO	0.238	0.687946	0.150325	4.95449e-06	0.243	0.210322	0.233473	0.367868	0.2395	0.548	0.1264	1.454e-05
7	82476865	rs2887981	C	T	PCLO	0.057	0.83126	0.280105	0.00302816	0.048	1.33752	0.477651	0.00519533	0.0547	0.9608	0.2416	6.995e-05
7	82476936	rs4483093	A	G	PCLO	0.057	0.83126	0.280105	0.00302816	0.048	1.33752	0.477651	0.00519533	0.0547	0.9608	0.2416	6.995e-05
7	82477648	rs2522839	A	G	PCLO	0.762	-0.680883	0.150363	6.21687e-06	0.756	-0.195177	0.233303	0.403008	0.7602	-0.5383	0.1264	2.049e-05
7	82478133	rs75165430	C	T	PCLO	0.943	-0.83126	0.280105	0.00302816	0.952	-1.33752	0.477651	0.00519533	0.9453	-0.9608	0.2416	6.995e-05
7	82478415	rs2522840	G	T	PCLO	0.238	0.687946	0.150325	4.95449e-06	0.244	0.195177	0.233303	0.403008	0.2398	0.5434	0.1264	1.707e-05
7	82478596	rs2107069	C	T	PCLO	0.762	-0.687946	0.150325	4.95449e-06	0.756	-0.195177	0.233303	0.403008	0.7602	-0.5434	0.1264	1.707e-05
7	82479194	rs2522841	G	T	PCLO	0.762	-0.694521	0.150143	3.9166e-06	0.754	-0.252786	0.232464	0.277088	0.7596	-0.5645	0.1261	7.616e-06
7	82479328	rs11330747	A	AT	PCLO	0.058	0.852499	0.279697	0.00232751	0.049	1.27803	0.476068	0.00737049	0.0557	0.9617	0.2412	6.668e-05
7	82479662	rs2522842	G	T	PCLO	0.761	-0.68734	0.150133	4.91182e-06	0.754	-0.252786	0.232464	0.277088	0.7589	-0.5594	0.1261	9.172e-06
7	82479722	rs2522843	A	C	PCLO	0.242	0.670504	0.149398	7.50295e-06	0.249	0.287706	0.232402	0.21599	0.244	0.5586	0.1257	8.801e-06
7	82480092	rs2522844	C	T	PCLO	0.761	-0.68734	0.150133	4.91182e-06	0.754	-0.238869	0.232471	0.304399	0.7589	-0.5553	0.1261	1.066e-05
7	82480209	rs115077220	A	C	PCLO	0.057	0.83126	0.280105	0.00302816	0.048	1.33752	0.477651	0.00519533	0.0547	0.9608	0.2416	6.995e-05
7	82480999	rs79866645	A	G	PCLO	0.943	-0.83126	0.280105	0.00302816	0.952	-1.33752	0.477651	0.00519533	0.9453	-0.9608	0.2416	6.995e-05
7	82481909	rs2522845	G	T	PCLO	0.223	0.665817	0.155222	1.85707e-05	0.232	0.241333	0.237406	0.309592	0.2257	0.5387	0.1299	3.377e-05
7	82482281	rs2715161	C	T	PCLO	0.329	-0.628985	0.136787	4.46542e-06	0.338	0.283225	0.213144	0.184187	0.3316	-0.3629	0.1151	0.00162
7	82509435	rs10250881	C	T	PCLO	0.271	-0.56405	0.143278	8.47718e-05	0.275	0.125147	0.221724	0.572578	0.2722	-0.361	0.1203	0.002698
7	82516530	rs6965423	C	T	PCLO	0.727	0.56166	0.143512	9.32488e-05	0.725	-0.114692	0.221654	0.604954	0.7264	0.3619	0.1205	0.002665
7	82517273	rs58043442	C	T	PCLO	0.731	0.583072	0.143847	5.197e-05	0.73	-0.076866	0.222714	0.730059	0.7307	0.3888	0.1208	0.001292
7	82531183	rs12154481	A	C	PCLO	0.266	-0.583809	0.144501	5.49716e-05	0.266	0.0186888	0.223086	0.933251	0.266	-0.4057	0.1213	0.0008216
7	82532649	rs4618640	C	T	PCLO	0.735	0.572513	0.144907	7.99487e-05	0.733	-0.0287465	0.223201	0.897546	0.7344	0.3942	0.1215	0.00118
7	82533663		A	G	PCLO	0.264	-0.603256	0.144659	3.14397e-05	0.266	0.024523	0.223214	0.912538	0.2646	-0.4176	0.1214	0.0005822
7	82533922	rs11762318	A	C	PCLO	0.734	0.576396	0.144719	6.99746e-05	0.733	-0.0386546	0.222803	0.862296	0.7337	0.3939	0.1214	0.001172
7	82534715	rs10808302	A	C	PCLO	0.736	0.607344	0.144547	2.73911e-05	0.734	-0.024523	0.223214	0.912538	0.7354	0.4207	0.1213	0.0005261
7	82539206	rs2189969	A	C	PCLO	0.268	-0.590862	0.144076	4.24001e-05	0.268	0.0414169	0.222703	0.852499	0.268	-0.4043	0.121	0.0008309
7	82539207	rs2189970	A	T	PCLO	0.732	0.590862	0.144076	4.24001e-05	0.732	-0.0414169	0.222703	0.852499	0.732	0.4043	0.121	0.0008309
7	82555669	rs2107828	A	T	PCLO	0.271	-0.607345	0.144057	2.57221e-05	0.263	0.0770486	0.225324	0.732456	0.2687	-0.4088	0.1214	0.0007574
7	82569657	rs6467917	A	G	PCLO	0.776	0.616463	0.156119	8.06885e-05	0.781	0.029111	0.23872	0.902964	0.7775	0.4405	0.1307	0.0007477
7	82575558	rs2057889	A	T	PCLO	0.783	0.62075	0.158211	8.95301e-05	0.782	0.0554278	0.238984	0.816634	0.7827	0.4485	0.1319	0.0006748
7	82603959	rs17371806	A	G	PCLO	0.546	-0.558581	0.127279	1.18653e-05	0.538	-0.00993889	0.202202	0.960806	0.5437	-0.4029	0.1077	0.0001838
7	82616835	rs7778238	C	G	PCLO	0.544	-0.548021	0.127577	1.80657e-05	0.536	-0.0779133	0.201676	0.699327	0.5417	-0.4137	0.1078	0.0001247
7	83653800	rs60082927	T	TGCAGTGTGCTGAGACC	SEMA3A	0.672	-0.370418	0.134749	0.0060202	0.658	-0.621302	0.210809	0.00327314	0.6679	-0.4432	0.1135	9.481e-05
7	83659124	rs1534074	C	T	SEMA3A	0.63	-0.402637	0.131125	0.00215834	0.62	-0.506885	0.204104	0.0131573	0.6271	-0.4331	0.1103	8.645e-05
7	85110875	rs55804990	A	G		0.761	0.611526	0.151132	5.35608e-05	0.755	-0.324834	0.229828	0.157825	0.7592	0.3289	0.1263	0.009207
7	85112099	rs55662263	C	T		0.761	0.618147	0.151151	4.4535e-05	0.755	-0.324834	0.229828	0.157825	0.7592	0.3334	0.1263	0.008285
7	85116435	rs4728581	C	T		0.448	0.521759	0.127653	4.49714e-05	0.425	-0.164355	0.200293	0.412065	0.4414	0.3236	0.1076	0.002649
7	85117249	rs10269600	G	T		0.452	0.511094	0.127429	6.22299e-05	0.43	-0.179554	0.199873	0.369198	0.4456	0.3115	0.1074	0.003744
7	85117800	rs398047816	A	AT		0.448	0.521759	0.127653	4.49714e-05	0.425	-0.164355	0.200293	0.412065	0.4414	0.3236	0.1076	0.002649
7	85121688	rs10952850	A	G		0.448	0.528504	0.12774	3.62598e-05	0.424	-0.174117	0.200509	0.385377	0.4411	0.3257	0.1077	0.002504
7	85123392	rs4142954	C	T		0.448	0.528504	0.12774	3.62598e-05	0.424	-0.174117	0.200509	0.385377	0.4411	0.3257	0.1077	0.002504
7	85737925	rs115130494	C	T		0.973	-1.56387	0.398562	8.94442e-05	0.972	-0.474679	0.611406	0.437694	0.9727	-1.2391	0.3339	0.0002064
7	85739254	rs115609111	A	T		0.027	1.58103	0.394702	6.35995e-05	0.028	0.474679	0.611406	0.437694	0.0273	1.2556	0.3316	0.0001529
7	85739518	rs79052322	A	G		0.027	1.58103	0.394702	6.35995e-05	0.028	0.474679	0.611406	0.437694	0.0273	1.2556	0.3316	0.0001529
7	85747298	rs116092600	C	G		0.027	1.60275	0.396133	5.36321e-05	0.028	0.474679	0.611406	0.437694	0.0273	1.2692	0.3325	0.0001347
7	85747477	rs116271488	A	G		0.027	1.60275	0.396133	5.36321e-05	0.028	0.474679	0.611406	0.437694	0.0273	1.2692	0.3325	0.0001347
7	85767909	rs549983072	T	TCA		0.974	-1.62331	0.404131	6.06808e-05	0.973	-0.482268	0.616076	0.433908	0.9737	-1.28	0.3379	0.0001519
7	85826031		C	G		0.969	-1.47365	0.374522	8.54816e-05	0.971	-0.577405	0.598128	0.334577	0.9696	-1.2212	0.3174	0.0001195
7	85829840	rs2041512	A	G		0.031	1.47365	0.374522	8.54816e-05	0.029	0.558813	0.598858	0.350955	0.0304	1.2164	0.3175	0.0001277
7	85832136	rs4728624	A	G		0.031	1.47365	0.374522	8.54816e-05	0.029	0.558813	0.598858	0.350955	0.0304	1.2164	0.3175	0.0001277
7	85832173	rs4015948	C	T		0.969	-1.47365	0.374522	8.54816e-05	0.971	-0.558813	0.598858	0.350955	0.9696	-1.2164	0.3175	0.0001277
7	85833025	rs6465044	A	G		0.031	1.47365	0.374522	8.54816e-05	0.029	0.558813	0.598858	0.350955	0.0304	1.2164	0.3175	0.0001277
7	85836558	rs10952873	C	G		0.969	-1.47365	0.374522	8.54816e-05	0.971	-0.558813	0.598858	0.350955	0.9696	-1.2164	0.3175	0.0001277
7	85844581	rs397798305	A	AATTT		0.032	1.46865	0.373448	8.62162e-05	0.029	0.558813	0.598858	0.350955	0.0312	1.2139	0.3169	0.0001277
7	85850329	rs6968531	C	G		0.969	-1.47365	0.374522	8.54816e-05	0.971	-0.558813	0.598858	0.350955	0.9696	-1.2164	0.3175	0.0001277
7	85854902	rs386410645	A	AGG		0.969	-1.47365	0.374522	8.54816e-05	0.971	-0.558813	0.598858	0.350955	0.9696	-1.2164	0.3175	0.0001277
7	85857848		A	C		0.969	-1.47365	0.374522	8.54816e-05	0.971	-0.558813	0.598858	0.350955	0.9696	-1.2164	0.3175	0.0001277
7	85858923	rs10241660	C	T		0.031	1.47365	0.374522	8.54816e-05	0.029	0.558813	0.598858	0.350955	0.0304	1.2164	0.3175	0.0001277
7	85867057	rs10261768	A	C		0.031	1.47365	0.374522	8.54816e-05	0.029	0.558813	0.598858	0.350955	0.0304	1.2164	0.3175	0.0001277
7	85869186	rs2708562	A	C		0.031	1.47365	0.374522	8.54816e-05	0.029	0.558813	0.598858	0.350955	0.0304	1.2164	0.3175	0.0001277
7	85869640	rs2708564	C	T		0.031	1.47365	0.374522	8.54816e-05	0.029	0.558813	0.598858	0.350955	0.0304	1.2164	0.3175	0.0001277
7	85869816	rs2536250	C	G		0.031	1.47365	0.374522	8.54816e-05	0.029	0.558813	0.598858	0.350955	0.0304	1.2164	0.3175	0.0001277
7	85877476	rs1016841	C	T		0.969	-1.47365	0.374522	8.54816e-05	0.971	-0.558813	0.598858	0.350955	0.9696	-1.2164	0.3175	0.0001277
7	85881507	rs981072	A	G		0.969	-1.47365	0.374522	8.54816e-05	0.971	-0.558813	0.598858	0.350955	0.9696	-1.2164	0.3175	0.0001277
7	85961900		C	T		0.962	-1.56358	0.342103	5.09442e-06	0.969	-0.300419	0.582515	0.606147	0.9638	-1.2396	0.295	2.642e-05
7	88574893	rs7785253	C	T	ZNF804B	0.044	0.0581012	0.313832	0.853138	0.046	1.90301	0.466977	4.92447e-05	0.0446	0.6321	0.2605	0.01524
7	94375007	rs6976389	A	G		0.397	-0.513301	0.13162	9.86981e-05	0.404	-0.367442	0.202964	0.0705059	0.3991	-0.4701	0.1104	2.071e-05
7	94377131	rs6959350	G	T		0.435	-0.494279	0.130752	0.000160198	0.44	-0.281261	0.199695	0.159276	0.4365	-0.4304	0.1094	8.348e-05
7	94378595	rs67770164	A	G		0.849	0.77274	0.17849	1.55279e-05	0.859	0.175522	0.280069	0.530977	0.8519	0.6002	0.1505	6.671e-05
7	94379885	rs34199742	T	TA		0.494	0.469746	0.128281	0.000255424	0.498	0.463944	0.198797	0.0197854	0.4952	0.468	0.1078	1.41e-05
7	94392770	rs6973986	A	G		0.425	-0.487986	0.131547	0.00021198	0.434	-0.363764	0.199919	0.0690946	0.4277	-0.4505	0.1099	4.148e-05
7	95559023	rs2888984	G	T	DYNC1I1	0.061	-1.04986	0.269837	0.000102471	NA	NA	NA	NA	0.061	-1.0499	0.2698	9.995e-05
7	96648811	rs1724299	A	G		0.888	-0.785204	0.201368	9.89093e-05	0.885	-0.0628194	0.306003	0.837383	0.8871	-0.5669	0.1682	0.0007512
7	96654349	rs73708843	A	G	DLX5	0.247	0.589812	0.147551	6.58501e-05	0.238	0.105066	0.229595	0.647318	0.2444	0.4481	0.1241	0.000306
7	97192921	rs372703065	C	CT		0.017	1.94721	0.495827	8.81945e-05	NA	NA	NA	NA	0.017	1.9472	0.4958	8.594e-05
7	103988338		T	TA	LHFPL3	0.526	0.157236	0.128785	0.222229	0.536	0.800266	0.198631	5.98374e-05	0.529	0.3475	0.1081	0.001299
7	104117988	rs12333888	A	C	LHFPL3	0.254	-0.580944	0.14503	6.35863e-05	0.262	-0.0469188	0.229835	0.838281	0.2563	-0.4289	0.1227	0.0004713
7	112282100	rs150869232	C	G		0.015	2.04467	0.524609	9.96612e-05	NA	NA	NA	NA	0.015	2.0447	0.5246	9.719e-05
7	112292166	rs143972851	C	T		0.986	-2.14041	0.53472	6.43453e-05	NA	NA	NA	NA	0.986	-2.1404	0.5347	6.258e-05
7	112351265	rs551262867	A	G		0.987	-2.22983	0.562932	7.66271e-05	NA	NA	NA	NA	0.987	-2.2298	0.5629	7.461e-05
7	120759189	rs202203893	C	CT	CPED1	0.744	-0.514946	0.146366	0.000441979	0.716	-0.531825	0.219531	0.0155708	0.7354	-0.5201	0.1218	1.945e-05
7	120761932	rs13245677	A	G	CPED1	0.263	0.463133	0.145547	0.00147989	0.289	0.568919	0.219822	0.00977645	0.2709	0.4954	0.1214	4.466e-05
7	120770437	rs34320754	A	G	CPED1	0.3	0.441446	0.13926	0.00154255	0.323	0.496548	0.211263	0.0189278	0.307	0.4581	0.1163	8.14e-05
7	120772016	rs397712499	G	GT	CPED1	0.705	-0.464545	0.140361	0.000946981	0.681	-0.489882	0.212866	0.0215551	0.6977	-0.4722	0.1172	5.58e-05
7	120774116	rs34249834	A	C	CPED1	0.289	0.487913	0.141311	0.000563789	0.314	0.51223	0.214398	0.0170526	0.2966	0.4953	0.118	2.696e-05
7	120774160	rs7801723	C	T	CPED1	0.751	-0.488392	0.147671	0.000954905	0.726	-0.700337	0.222268	0.00167126	0.7433	-0.5533	0.123	6.847e-06
7	120774941	rs12706318	A	G	CPED1	0.711	-0.487913	0.141311	0.000563789	0.686	-0.51223	0.214398	0.0170526	0.7034	-0.4953	0.118	2.696e-05
7	120775815	rs10953928	A	G	CPED1	0.3	0.44863	0.139242	0.0012891	0.323	0.467009	0.211813	0.0276709	0.3069	0.4542	0.1164	9.484e-05
7	120776281	rs13232048	G	T	CPED1	0.709	-0.496231	0.141074	0.00044313	0.685	-0.518824	0.214005	0.0154939	0.7017	-0.5031	0.1178	1.945e-05
7	120776860	rs35758028	A	G	CPED1	0.3	0.44863	0.139242	0.0012891	0.323	0.467009	0.211813	0.0276709	0.3069	0.4542	0.1164	9.484e-05
7	120777183	rs6947453	G	T	CPED1	0.7	-0.44863	0.139242	0.0012891	0.677	-0.467009	0.211813	0.0276709	0.6931	-0.4542	0.1164	9.484e-05
7	120777717	rs6951990	A	C	CPED1	0.253	0.46128	0.14674	0.00168829	0.276	0.675221	0.222398	0.00245236	0.26	0.5262	0.1225	1.74e-05
7	120779576	rs34770628	C	T	CPED1	0.747	-0.46128	0.14674	0.00168829	0.724	-0.675221	0.222398	0.00245236	0.74	-0.5262	0.1225	1.74e-05
7	120779949	rs872007	C	T	CPED1	0.702	-0.449726	0.139193	0.00124927	0.678	-0.480785	0.21175	0.0233656	0.6948	-0.4591	0.1163	7.911e-05
7	120779990	rs872008	A	G	CPED1	0.298	0.449726	0.139193	0.00124927	0.322	0.480785	0.21175	0.0233656	0.3052	0.4591	0.1163	7.911e-05
7	120780285	rs868053	G	T	CPED1	0.702	-0.454488	0.139181	0.00110725	0.678	-0.480785	0.21175	0.0233656	0.6948	-0.4624	0.1163	7.012e-05
7	120780483	rs884373	G	T	CPED1	0.701	-0.441731	0.139276	0.00153375	0.678	-0.480785	0.21175	0.0233656	0.6941	-0.4535	0.1164	9.718e-05
7	120785064	rs13245690	A	G	CPED1	0.747	-0.46128	0.14674	0.00168829	0.724	-0.675221	0.222398	0.00245236	0.74	-0.5262	0.1225	1.74e-05
7	120789334	rs10712111	A	AC	CPED1	0.288	0.480988	0.141374	0.000678545	0.314	0.526403	0.214341	0.0142046	0.2959	0.4948	0.118	2.761e-05
7	120790287	rs6950680	A	G	CPED1	0.747	-0.46128	0.14674	0.00168829	0.724	-0.675221	0.222398	0.00245236	0.74	-0.5262	0.1225	1.74e-05
7	120795371	rs66871562	A	G	CPED1	0.748	-0.458373	0.14675	0.00180694	0.724	-0.675221	0.222398	0.00245236	0.7407	-0.5241	0.1225	1.875e-05
7	120806196	rs12706319	A	C	CPED1	0.706	-0.475659	0.140827	0.000742042	0.678	-0.552538	0.211964	0.00926259	0.6974	-0.4992	0.1173	2.083e-05
7	120812574	rs1112810	C	T	CPED1	0.282	0.451463	0.142541	0.00155683	0.311	0.600673	0.214316	0.00515475	0.2909	0.4972	0.1187	2.797e-05
7	120813920	rs67991850	C	T	CPED1	0.681	-0.464376	0.137122	0.000718261	0.65	-0.501295	0.208351	0.0162898	0.6716	-0.4755	0.1145	3.301e-05
7	124953792	rs113494934	A	G		0.12	-0.746115	0.200677	0.000205086	0.112	-0.481702	0.314127	0.125446	0.1177	-0.6695	0.1691	7.534e-05
7	124954191	rs6967573	C	T		0.121	-0.743142	0.20029	0.000211362	0.112	-0.461126	0.314718	0.143147	0.1184	-0.6618	0.169	8.971e-05
7	128375858	rs369708676	A	AATTTGACATGAGATTTGGGCGGGG		0.43	-0.107525	0.128811	0.403935	0.42	0.764304	0.195631	9.91274e-05	0.427	0.1561	0.1076	0.1467
7	131748240	rs1514057	A	G		0.359	0.0461606	0.142701	0.746359	0.38	0.840262	0.212882	8.40635e-05	0.3655	0.2924	0.1185	0.01365
7	141766850	rs78792449	A	G	MGAM	0.05	-0.992048	0.290193	0.000639252	0.043	-0.9558	0.482008	0.0476175	0.0481	-0.9824	0.2486	7.765e-05
7	144580310	rs7789135	A	G		0.03	-1.47096	0.368246	6.66403e-05	0.028	-0.169953	0.594618	0.775071	0.0294	-1.1103	0.3131	0.0003904
7	147206369	rs1528512	A	G	CNTNAP2	0.557	0.409613	0.128839	0.00149396	0.574	0.515795	0.199155	0.00972516	0.562	0.4409	0.1082	4.579e-05
7	147809949	rs398006722	G	GT	CNTNAP2	0.954	-0.841237	0.302315	0.00543096	0.943	-1.34559	0.430975	0.0018413	0.9504	-1.0076	0.2475	4.68e-05
7	147813744	rs9640515	A	G	CNTNAP2	0.191	0.415227	0.159851	0.00944156	0.203	0.827336	0.24582	0.00078977	0.1946	0.5377	0.134	6.01e-05
7	154957585	rs62472095	A	G		0.643	0.586666	0.138004	2.20292e-05	NA	NA	NA	NA	0.643	0.5867	0.138	2.127e-05
7	154957589	rs62472096	A	G		0.643	0.583836	0.137877	2.3709e-05	NA	NA	NA	NA	0.643	0.5838	0.1379	2.291e-05
7	154957593	rs6955550	A	G		0.64	0.572475	0.137434	3.20923e-05	NA	NA	NA	NA	0.64	0.5725	0.1374	3.107e-05
7	154963787	rs1657298	A	G		0.188	-0.706197	0.164616	1.85269e-05	NA	NA	NA	NA	0.188	-0.7062	0.1646	1.787e-05
8	609867	rs13262478	A	G	ERICH1	0.287	0.136745	0.140009	0.328815	0.287	0.901808	0.215983	3.20724e-05	0.287	0.3631	0.1175	0.001997
8	609880	rs12675823	C	T	ERICH1	0.711	-0.137366	0.139766	0.325785	0.71	-0.889726	0.215418	3.89477e-05	0.7107	-0.3603	0.1172	0.002122
8	4071327	rs1700069	C	G	CSMD1	0.166	0.701989	0.174992	6.20341e-05	0.151	0.101055	0.268911	0.707141	0.1615	0.5232	0.1467	0.0003607
8	4182801	rs73504698	C	G	CSMD1	0.939	-1.04026	0.266088	9.48813e-05	NA	NA	NA	NA	0.939	-1.0403	0.2661	9.25e-05
8	4182900	rs143818161	A	G	CSMD1	0.011	-2.3491	0.602398	9.88162e-05	NA	NA	NA	NA	0.011	-2.3491	0.6024	9.636e-05
8	4183387	rs148442360	C	G	CSMD1	0.011	-2.3491	0.602398	9.88162e-05	NA	NA	NA	NA	0.011	-2.3491	0.6024	9.636e-05
8	8161901	rs73521251	A	C		0.981	0.812366	0.474183	0.0867975	0.979	2.75419	0.697647	8.38071e-05	0.9804	1.426	0.3922	0.0002768
8	8636096	rs473258	G	T		0.704	0.247133	0.144043	0.0863397	0.707	0.851309	0.215305	8.17163e-05	0.7049	0.4339	0.1197	0.0002894
8	9537427		A	G	TNKS	0.874	-0.533756	0.197565	0.00694421	0.885	-0.923357	0.306383	0.00263888	0.8772	-0.6482	0.166	9.47e-05
8	9836818	rs79314841	A	G		0.027	-0.600143	0.392894	0.126761	0.025	2.65042	0.631911	2.95467e-05	0.0264	0.3061	0.3337	0.3589
8	10533277	rs139721333	C	T	RP1L1	0.967	-1.49493	0.359559	3.31964e-05	NA	NA	NA	NA	0.967	-1.4949	0.3596	3.215e-05
[truncated: 1,439 more rows]
