# Supplementary material for: Genome-wide association study identifies glutamate ionotropic receptor GRIA4 as a risk gene for comorbid nicotine dependence and major depression
Source: Transl Psychiatry. 2018 Oct 4;8:208. doi: 10.1038/s41398-018-0258-8 (PMC6172277; doi:10.1038/s41398-018-0258-8)
Supplement: Supplementary file 7 — Supplemental Figure S2 [file 41398_2018_258_MOESM7_ESM.xlsx]

## Sheet: Sheet1
Supplementary Table 2. Top 100 genes co-expressed with GRIA4.
Order	Gene	Function	Entrez Gene ID	Supportability*	Hsa MR for GRIA4
0	GRIA4	glutamate receptor, ionotropic, AMPA 4	2893	3	0
1	CRB1	crumbs family member 1, photoreceptor morphogenesis associated	23418	2	4.6
2	SLC17A6	solute carrier family 17 (vesicular glutamate transporter), member 6	57084	3	35.2
3	C2orf80	chromosome 2 open reading frame 80	389073	3	40
4	SNAP91	synaptosomal-associated protein, 91kDa	9892	3	42.4
5	RIT2	Ras-like without CAAX 2	6014	3	46.5
6	LPPR5	lipid phosphate phosphatase-related protein type 5	163404	3	49.2
7	CNTN1	contactin 1	1272	3	49.6
8	ZNF135	zinc finger protein 135	7694	1	57.2
9	CLVS1	clavesin 1	157807	1	61.5
10	CDH10	cadherin 10, type 2 (T2-cadherin)	1008	3	68.4
11	NLGN1	neuroligin 1	22871	3	70.9
12	LRRTM4	leucine rich repeat transmembrane neuronal 4	80059	3	85.2
13	KCND2	potassium voltage-gated channel, Shal-related subfamily, member 2	3751	3	89.1
14	CAMK2B	calcium/calmodulin-dependent protein kinase II beta	816	0	101.3
15	NRSN1	neurensin 1	140767	3	105.2
16	DNM1P33	DNM1 pseudogene 33	554175	0	107
17	ACPT	acid phosphatase, testicular	93650	1	108.7
18	NAALAD2	N-acetylated alpha-linked acidic dipeptidase 2	10003	3	108.8
19	ELAVL4	ELAV like neuron-specific RNA binding protein 4	1996	3	110.7
20	CADM2	cell adhesion molecule 2	253559	3	121.3
21	AMER3	APC membrane recruitment protein 3	205147	1	123.5
22	GRM5	glutamate receptor, metabotropic 5	2915	1	125.8
23	CA10	carbonic anhydrase X	56934	3	126
24	NCAM2	neural cell adhesion molecule 2	4685	3	128.9
25	LHFPL3	lipoma HMGIC fusion partner-like 3	375612	3	129
26	NDUFA10	NADH dehydrogenase (ubiquinone) 1 alpha subcomplex, 10, 42kDa	4705	2	131.8
27	OLFM3	olfactomedin 3	118427	3	136.1
28	MYOZ3	myozenin 3	91977	0	150.4
29	BCAN	brevican	63827	2	154.2
30	SUN5	Sad1 and UNC84 domain containing 5	140732	1	161.1
31	MCF2L2	MCF.2 cell line derived transforming sequence-like 2	23101	1	163.7
32	LRRC4C	leucine rich repeat containing 4C	57689	3	169.1
33	ATP6V1G2	ATPase, H+ transporting, lysosomal 13kDa, V1 subunit G2	534	3	169.7
34	SLC24A2	solute carrier family 24 (sodium/potassium/calcium exchanger), member 2	25769	2	169.9
35	MYT1	myelin transcription factor 1	4661	3	171.3
36	MRGPRG-AS1	MRGPRG antisense RNA 1	283303	1	174
37	CDH12	cadherin 12, type 2 (N-cadherin 2)	1010	3	176.6
38	NXPH1	neurexophilin 1	30010	3	178.7
39	TNR	tenascin R	7143	0	180.6
40	STMN4	stathmin-like 4	81551	3	185.9
41	KRTAP10-11	keratin associated protein 10-11	386678	2	189.7
42	LOC100130868		100130868	0	192.1
43	GPR85	G protein-coupled receptor 85	54329	3	206.6
44	GALR3	galanin receptor 3	8484	1	211.3
45	LOC645478		645478	0	216.2
46	C9orf62	chromosome 9 open reading frame 62	157927	1	219.5
47	RTP5	receptor (chemosensory) transporter protein 5 (putative)	285093	1	223.6
48	SPOCK3	sparc/osteonectin, cwcv and kazal-like domains proteoglycan (testican) 3	50859	3	223.7
49	OGFRP1	opioid growth factor receptor pseudogene 1	388906	1	225.3
50	SLITRK1	SLIT and NTRK-like family, member 1	114798	3	228.5
51	TMEM257	transmembrane protein 257	9142	3	228.6
52	GALNT13	polypeptide N-acetylgalactosaminyltransferase 13	114805	3	229.1
53	GABRB1	gamma-aminobutyric acid (GABA) A receptor, beta 1	2560	3	233.8
54	SPAG11A	sperm associated antigen 11A	653423	0	236.6
55	FGF22	fibroblast growth factor 22	27006	0	238.8
56	OPCML	opioid binding protein/cell adhesion molecule-like	4978	3	242.1
57	LOC286178	uncharacterized LOC286178	286178	0	243.5
58	OMG	oligodendrocyte myelin glycoprotein	4974	3	244.6
59	DNAH3	dynein, axonemal, heavy chain 3	55567	3	246.3
60	LOC283713	uncharacterized LOC283713	283713	0	246.9
61	C11orf87	chromosome 11 open reading frame 87	399947	3	253.6
62	NRCAM	neuronal cell adhesion molecule	4897	3	263.7
63	PHYHIPL	phytanoyl-CoA 2-hydroxylase interacting protein-like	84457	3	267.3
64	LOC255654	uncharacterized LOC255654	255654	0	270.6
65	IL12RB1	interleukin 12 receptor, beta 1	3594	3	279.8
66	PCDH9	protocadherin 9	5101	3	282.3
67	LPHN3	latrophilin 3	23284	3	284.1
68	GPR17	G protein-coupled receptor 17	2840	3	286.1
69	ADAMTS13	ADAM metallopeptidase with thrombospondin type 1 motif, 13	11093	1	288.4
70	BRINP3	bone morphogenetic protein/retinoic acid inducible neural-specific 3	339479	3	288.6
71	MAPT-AS1	MAPT antisense RNA 1	100128977	0	292.5
72	MAP4	microtubule-associated protein 4	4134	3	292.9
73	PRDM12	PR domain containing 12	59335	1	296.3
74	LRRTM2	leucine rich repeat transmembrane neuronal 2	26045	3	298.9
75	SGSM1	small G protein signaling modulator 1	129049	1	299.6
76	ADCYAP1R1	adenylate cyclase activating polypeptide 1 (pituitary) receptor type I	117	2	303.1
77	DACH2	dachshund family transcription factor 2	117154	2	303.9
78	AVPR1B	arginine vasopressin receptor 1B	553	1	307.3
79	LOC100130426		100130426	0	311.7
80	SORCS3	sortilin-related VPS10 domain containing receptor 3	22986	3	318.1
81	EVC2	Ellis van Creveld syndrome 2	132884	0	320.6
82	CSMD3	CUB and Sushi multiple domains 3	114788	3	322.1
83	OR7E104P	olfactory receptor, family 7, subfamily E, member 104 pseudogene	81137	0	328.8
84	KCNIP1	Kv channel interacting protein 1	30820	2	329.1
85	NUP214	nucleoporin 214kDa	8021	0	332.6
86	ACSL6	acyl-CoA synthetase long-chain family member 6	23305	1	336.1
87	ADSSL1	adenylosuccinate synthase like 1	122622	0	339.3
88	GAP43	growth associated protein 43	2596	3	341.2
89	PIEZO2	piezo-type mechanosensitive ion channel component 2	63895	0	341.4
90	LOC157503	uncharacterized LOC157503	157503	0	342.4
91	AHDC1	AT hook, DNA binding motif, containing 1	27245	0	344.3
92	OR13C4	olfactory receptor, family 13, subfamily C, member 4	138804	1	356
93	ATP2B2	ATPase, Ca++ transporting, plasma membrane 2	491	1	358.8
94	LOC284939	uncharacterized LOC284939	284939	0	359.4
95	OLIG2	oligodendrocyte lineage transcription factor 2	10215	3	364.2
96	NCAN	neurocan	1463	3	367.4
97	NCAM1	neural cell adhesion molecule 1	4684	1	367.5
98	SLC29A2	solute carrier family 29 (equilibrative nucleoside transporter), member 2	3177	0	368.1
99	OR2L13	olfactory receptor, family 2, subfamily L, member 13	284521	1	374.3
100	SH3GL2	SH3-domain GRB2-like 2	6456	3	379.3
* supportability:
	3, < e-32
	2, < e-16
	1, < e-04
	0, >= e-04
