# Supplementary material for: Genome-wide association study identifies glutamate ionotropic receptor GRIA4 as a risk gene for comorbid nicotine dependence and major depression
Source: Transl Psychiatry. 2018 Oct 4;8:208. doi: 10.1038/s41398-018-0258-8 (PMC6172277; doi:10.1038/s41398-018-0258-8)
Supplement: Supplementary file 8 — Supplemental Figure S3 [file 41398_2018_258_MOESM8_ESM.xlsx]

## Sheet: Sheet1
Supplementary Table 3. Enriched PharmGKB diseases of the co-expressed genes with GRIA4.
PharmGKB disease	C	O	E	R	PValue	FDR	Genes
PA447208~Mental Disorders	679	16	2.67323	5.98527	6.48769e-09	1.69848e-05	CDH10,OLIG2,SLITRK1,ADCYAP1R1,NCAN,NLGN1,ACSL6,GABRB1,GRIA4,GRM5,NXPH1,NCAM1,NRCAM,AVPR1B,SLC17A6,GALR3
PA447278~Depression	229	10	0.901575	11.0917	2.11864e-08	2.7733e-05	ADCYAP1R1,NLGN1,GRIA4,GRM5,NXPH1,NCAM1,AVPR1B,SLC17A6,PIEZO2,GALR3
PA447199~Bipolar Disorder	423	12	1.66535	7.20567	8.80015e-08	7.6796e-05	SLITRK1,NCAN,NLGN1,GABRB1,GRIA4,GRM5,OGFRP1,NCAM1,AVPR1B,SLC17A6,GALR3,SNAP91
PA447198~Autistic Disorder	230	9	0.905512	9.93913	2.87964e-07	0.000188473	CDH10,NLGN1,GABRB1,GRM5,KCND2,LHFPL3,NRCAM,ATP2B2,CAMK2B
PA447196~Anxiety Disorders	189	8	0.744094	10.7513	7.63265e-07	0.000399645	SLITRK1,ADCYAP1R1,NLGN1,GRM5,NXPH1,NRCAM,AVPR1B,GALR3
PA447209~Mood Disorders	208	8	0.818898	9.76923	1.5695e-06	0.000684823	NLGN1,GRIA4,GRM5,NXPH1,NCAM1,AVPR1B,SLC17A6,GALR3
PA447216~Schizophrenia	471	10	1.85433	5.39278	1.49861e-05	0.00560481	OLIG2,NCAN,ACSL6,GABRB1,GRIA4,GRM5,NCAM1,GPR85,SLC17A6,TNR
PA443275~Adhesion	717	12	2.82283	4.25105	2.13177e-05	0.0069762	CDH10,CDH12,ADAMTS13,CNTN1,NCAN,NLGN1,CADM2,NCAM1,NCAM2,NRCAM,OPCML,TNR
C: number of reference genes in the category
O: observed number of genes
E: expected number of genes
R: ratio of enrichment
