# Supplementary material for: Genome-wide association study identifies glutamate ionotropic receptor GRIA4 as a risk gene for comorbid nicotine dependence and major depression
Source: Transl Psychiatry. 2018 Oct 4;8:208. doi: 10.1038/s41398-018-0258-8 (PMC6172277; doi:10.1038/s41398-018-0258-8)
Supplement: Supplementary file 9 — Supplemental Figure S4 [file 41398_2018_258_MOESM9_ESM.xlsx]

## Sheet: Sheet1
Supplementary Table 4. Enriched PharmGKB diseases of the genes mapped to top SNVs (P < 1 x 10-4).
PharmGKB disease	C	O	E	R	PValue	FDR	Genes
PA447208~Mental Disorders	679	28	6.64594	4.2131	1.10999e-10	2.90595e-07	CDH9,TMEM132D,CRHR1,MACROD2,DAO,DRD3,NAALADL2,GABRB1,NALCN,CNTNAP2,CNTN6,PCLO,SLC9A9,GRIA4,GRM7,LUZP2,NGF,PLXNA2,RBFOX1,PTPRD,ROBO2,RORA,CSMD1,TDO2,FAM155A,TUSC3,COL25A1,NOS1AP
PA447199~Bipolar Disorder	423	19	4.14026	4.58909	3.6304e-08	4.75219e-05	CIT,CRHR1,DAO,DRD3,GABRB1,NALCN,CNTNAP2,CNTN6,PCLO,GRIA4,GRM7,RERE,NGF,RBFOX1,PTPRG,RORA,CSMD1,FAM155A,NOS1AP
PA443687~Chagas Cardiomyopathy	130	11	1.27242	8.64495	6.1527e-08	5.36925e-05	PTGES3L-AARSD1,DYNC1I1,CAMTA1,CNTN6,SLC9A9,GRIA4,NELL1,ZFYVE28,PTPRD,CSMD1,DLGAP1
PA446882~Genetic Predisposition to Disease	958	26	9.37675	2.77282	2.28239e-06	0.00149382	BTN2A1,TMEM132D,SLC15A4,CRHR1,MACROD2,DAO,DRD3,NALCN,CNTNAP2,CNTN6,PCLO,SLC9A9,MSR1,PARK2,PLXNA2,RBFOX1,ACOXL,ZFAT,PTPRD,RORA,CSMD1,TGFBR3,FTO,ZNF385D,DNAH11,NOS1AP
PA446743~Parasitemia	135	9	1.32136	6.81117	7.3185e-06	0.00383196	PTGES3L-AARSD1,DYNC1I1,CAMTA1,CNTN6,SLC9A9,GRIA4,NELL1,ZFYVE28,DLGAP1
PA447196~Anxiety Disorders	189	10	1.8499	5.40569	1.74509e-05	0.0076144	TMEM132D,CRHR1,DRD3,CNTNAP2,CNTN6,GRM7,NGF,PLXNA2,PTPRD,DLGAP1
PA166048724~Attention Deficit and Disruptive Behavior Disorders	134	8	1.31157	6.09956	5.2598e-05	0.0196717	CDH13,DRD3,CNTNAP2,SLC9A9,GRM7,RBFOX1,ROBO2,FAM155A
PA443919~Disease Susceptibility	975	23	9.54314	2.41011	8.26991e-05	0.0241048	BTN2A1,TMEM132D,SLC15A4,CRHR1,MACROD2,DAO,DRD3,NALCN,CNTNAP2,CNTN6,SLC9A9,MSR1,PARK2,PLXNA2,RBFOX1,ACOXL,ZFAT,PTPRD,RORA,CSMD1,TGFBR3,FTO,NOS1AP
PA447278~Depression	229	10	2.24142	4.46147	8.88113e-05	0.0241048	CRHR1,DRD3,NAALADL2,PCLO,GRIA4,GRID2,GRM7,NGF,RORA,FAM155A
PA447198~Autistic Disorder	230	10	2.2512	4.44207	9.20733e-05	0.0241048	CDH9,MACROD2,DAO,GABRB1,CNTNAP2,SLC9A9,ATP2B2,RBFOX1,ROBO2,TDO2
PA447197~Attention Deficit Disorder with Hyperactivity	156	8	1.5269	5.23936	0.000152528	0.0363016	CDH13,DRD3,CNTNAP2,SLC9A9,GRM7,NGF,RBFOX1,FAM155A
PA447213~Personality Disorders	84	6	0.822178	7.29769	0.000174685	0.0381104	CRHR1,DAO,DRD3,PTPRD,ROBO2,FAM155A
PA445691~Smallpox	126	7	1.23327	5.67598	0.000242847	0.0489056	PLXNC1,DYNC1I1,THEMIS,TENM2,GREM2,CSMD1,PCDH15
PA153906318~Autism Spectrum Disorder	215	9	2.10439	4.27678	0.000274309	0.0495438	CDH9,MACROD2,DAO,DRD3,CADM1,CNTNAP2,GRM7,RBFOX1,HDAC4
PA446876~Substance-Related Disorders	216	9	2.11417	4.25698	0.000283865	0.0495438	CDH13,CRHR1,DRD3,GABRB1,CNTNAP2,GRM7,NGF,PTPRD,COL25A1
C: number of reference genes in the category
O: observed number of genes
E: expected number of genes
R: ratio of enrichment
